1  
2  
3  
4  
5  
6  
7  
8  
9  
10  
11  
12  
13  
14  
15  
16  
17  
18  
19  
20  
21  
22  
23  
24  
25  
26  
27  
28  
29  
30  
31  
32  
33  
34  
35  
36  
37  
38  
39  
40  
41

## Many si/shRNAs can kill cancer cells by targeting multiple survival genes through an off-target mechanism

William Putzbach<sup>1,6</sup>, Quan Q. Gao<sup>1,6</sup>, Monal Patel<sup>1,6</sup>, Stijn van Dongen<sup>4</sup>, Ashley Haluck-Kangas<sup>1</sup>, Aishe A. Sarshad<sup>5</sup>, Elizabeth Bartom<sup>2</sup>, Kwang-Youn A. Kim<sup>3</sup>, Denise M. Scholtens<sup>3</sup>, Markus Hafner<sup>5</sup>, Jonathan C. Zhao<sup>1</sup>, Andrea E. Murmann<sup>1</sup> and Marcus E. Peter<sup>1,2,\*</sup>

<sup>1</sup>Department of Medicine/Division Hematology/Oncology and <sup>2</sup>Department of Biochemistry and Molecular Genetics, <sup>3</sup>Department of Preventive Medicine, Feinberg School of Medicine, Northwestern University, Chicago, IL 60611, USA; <sup>4</sup>European Bioinformatics Institute (EMBL-EBI), Hinxton, Cambridge CB10 1SD, UK; <sup>5</sup>Laboratory of Muscle Stem Cells and Gene Regulation, NIAMS, NIH, Bethesda, MD 20892, USA.

Corresponding author: Marcus Peter, E-mail: m-peter@northwestern.edu, phone: 312-503-1291; FAX: 312-503-0189.

<sup>6</sup> Shared first authorship

Keywords:

RNAi, Fas, cancer, CRISPR, cell death, DISE, OTE

### Abstract

Over 80% of multiple tested siRNAs and shRNAs targeting CD95 or CD95 ligand (CD95L) induce a form of cell death characterized by simultaneous activation of multiple cell death pathways preferentially killing transformed and cancer stem cells. We now show these si/shRNAs kill cancer cells through canonical RNAi by targeting the 3'UTR of critical survival genes in a unique form of off-target effect we call DISE (death induced by survival gene elimination). Drosha and Dicer deficient cells, devoid of most miRNAs, are hypersensitive to DISE, suggesting cellular miRNAs protect cells from this form of cell death. By testing 4666 shRNAs derived from the CD95 and CD95L mRNA sequences and an unrelated control gene, Venus, we have identified many toxic sequences - most of them located in the open reading frame of CD95L. We propose that using specific toxic RNAi-active sequences present in the genome can kill cancer cells.

## 42 **Introduction**

43 One of the most popular methods utilized to reduce gene expression in cells is RNA  
44 interference (RNAi). RNAi has been used in several studies to identify genes critical for the  
45 survival of human cancer cell lines (Cowley et al., 2014; Hadji et al., 2014; Hart, Brown,  
46 Sircoulomb, Rottapel, & Moffat, 2014; Morgens, Deans, Li, & Bassik, 2016; Wang et al., 2015).  
47 During RNAi, gene expression is inhibited by small interfering (si)RNAs, small hairpin  
48 (sh)RNAs or micro (mi)RNAs. miRNAs are generated as primary transcripts in the nucleus  
49 where they undergo processing to pre-miRNAs by the Drosha-DGCR8 complex before being  
50 exported to the cytosol by exportin 5 (Ha & Kim, 2014; Krol, Loedige, & Filipowicz, 2010).  
51 Once in the cytosol, pre-miRNAs and shRNAs are cleaved by Dicer, a type III RNase that  
52 functions in complex with TRBP, generating 21-23 nucleotide long fragments of double-stranded  
53 RNA (dsRNA) that have two nucleotide 3' overhangs (Zamore, Tuschl, Sharp, & Bartel, 2000).  
54 DsRNA fragments or chemically synthesized double stranded siRNAs are loaded into the RNA-  
55 induced silencing complex (RISC) as single stranded RNAs (the guide RNA) (Siomi & Siomi,  
56 2009). A near-perfect complementarity between the guide strand of the si/miRNA and the target  
57 mRNA sequence results in cleavage of the mRNA (Pratt & MacRae, 2009). Incomplete  
58 complementarity results in inhibition of protein translation and contributes to mRNA degradation  
59 (Guo, Ingolia, Weissman, & Bartel, 2010). mRNA targeting is mostly determined by the seed  
60 sequence, positions 2-7/8 of the guide strand, which is fully complementary to the seed match in  
61 the 3'UTR of targeted mRNAs. Similar to miRNAs, although not fully explored, siRNAs and  
62 shRNAs also target multiple mRNAs besides the mRNAs they were designed to silence—a  
63 phenomenon commonly referred to as off-target effect (OTE)—that is generally sought to be  
64 avoided (Birmingham et al., 2006; Jackson et al., 2006; Lin et al., 2005).

65 The death receptor CD95 (Fas/APO-1) mediates induction of apoptosis when bound by its  
66 cognate CD95L, most prominently in the context of the immune system (Krammer, 2000).  
67 However, more recently, it has become apparent that the CD95/CD95L system has multiple  
68 tumor-promoting activities (Peter et al., 2007). CD95 signaling promotes cell growth (Chen et  
69 al., 2010), increases motility and invasiveness of cancer cells (Barnhart et al., 2004; Kleber et al.,  
70 2008), and promotes cancer stemness (Ceppi et al., 2014; Drachsler et al., 2016; Qadir et al.,  
71 2017). In fact, we reported tumors barely grew *in vivo* when the CD95 gene was deleted (Chen et  
72 al., 2010; Hadji et al., 2014). Therefore, it appeared consistent that multiple shRNAs and siRNAs  
73 targeting either CD95 or CD95L slowed down cancer cell growth (Chen et al., 2010) and

74 engaged a distinct form of cell death characterized by the activation of multiple cell death  
75 pathways (Hadji et al., 2014). This unique form of cell death cannot be inhibited by conventional  
76 cell death or signaling pathway inhibitors or by knockdown of any single gene in the human  
77 genome (Hadji et al., 2014); it preferentially affects transformed cells (Hadji et al., 2014)  
78 including cancer stem cells (Ceppi et al., 2014). Here we report that loading of CD95 and  
79 CD95L derived sequences (si/shRNAs targeting CD95 or CD95L) into the RISC elicits a distinct  
80 form of cell death that results from the targeting of multiple survival genes in a unique form of  
81 OTE.

82

## 83 **Results**

### 84 **si/shRNAs kill cells in the absence of the targeted site**

85 More than 80% of multiple tested shRNAs or siRNAs designed to target either CD95 or CD95L  
86 were toxic to multiple cancer cells (Hadji et al., 2014). We have now extended this analysis to  
87 Dicer substrate 27mer DsiRNAs designed to target CD95L (*Figure 1 - figure supplement 1A*,  
88 (D. H. Kim et al., 2005)). All five DsiRNAs displayed toxicity when introduced into HeyA8 cells  
89 at 5 nM (*Figure 1 - figure supplement 1B*) reinforcing our previous observation that the  
90 majority of CD95 and CD95L targeting si/shRNAs are toxic to cancer cells. We also analyzed a  
91 data set of a genome-wide analysis of 216 cells infected with a pooled library of the TRC  
92 shRNAs (Cowley et al., 2014). Most of the shRNAs we have tested were found to be depleted in  
93 the infected cell lines included, in this study. The following shRNAs were found to be depleted  
94 in the listed percentage of the 216 cell lines tested: shL4 (99.5%), shL1 (96.8%), shR6 (88.9%),  
95 shR7 (75%), shL2 (67.1%), shR5 (38.4%), shL5 (26.4%), and shR8 (21.3%) (*Figure 1 - figure*  
96 *supplement 1C*). Consistent with our data, shL1 and shR6 were found to be two of the most toxic  
97 shRNAs. Again in this independent analysis, the majority of tested shRNAs (67%) targeting  
98 either CD95 or CD95L killed more than half of all tested cancer cell lines.

99 Interestingly, a more recent RNAi screen did not report toxicity after expressing shRNAs  
100 against CD95 or CD95L (Morgens et al., 2016). The authors of this study used a second-  
101 generation shRNA platform based on a miR-30 backbone. To determine the source of the  
102 discrepancy in the data, we generated miR-30 based Tet-inducible versions of some of our most  
103 toxic shRNAs (shL1, shL3, shL4, shR5, shR6, and shR7, *Figure 1- figure supplement 2A*) and  
104 found none of them to be highly toxic to HeyA8 cells (*Figure 1- figure supplement 2B*). To  
105 determine their knockdown efficiency, we induced their expression in cells carrying sensor

106 plasmids in which the fluorophore Venus was linked to either the CD95L or CD95 open  
107 reading frame (ORF). Expression of most of these miR-30-based shRNAs also did not efficiently  
108 silence Venus expression (**Figure 1- figure supplement 2C**). In contrast, two of our most toxic  
109 shRNAs shL3 and shR6 when expressed in the Tet inducible pTIP vector not only killed HeyA8  
110 cells, but also very efficiently suppressed Venus fluorescence in cells expressing the targeted  
111 Venus sensor (**Figure 1- figure supplement 2D**). These data suggest that the levels of shRNAs  
112 produced from the miR-30 based vector may not be sufficient to be toxic to the cancer cells.  
113 Because expression levels of shRNAs are difficult to titer, we used siRNAs to determine the  
114 concentration of the toxic CD95L-derived siL3 required to kill HeyA8 cells (**Figure 1- figure**  
115 **supplement 2E**). Growth was effectively blocked (and cells died, data not shown) when siL3 was  
116 transfected at 1 nM—a concentration well below the commonly used and recommended siRNA  
117 concentration of 5-50 nM—but not at 0.1 nM. These data suggest this form of toxicity does not  
118 require high amounts of si- or shRNAs; however, that the low expression we achieved from the  
119 miR-30 based shRNA vectors was not enough to effectively induce the toxicity. Because these  
120 miR-30 based shRNA vectors were developed to reduce off-target effects, the toxicity of CD95  
121 and CD95L targeting si/shRNAs described by us and others could be due to an OTE. While this  
122 was a plausible explanation, the high percentage of toxic si/shRNAs derived from CD95 and  
123 CD95L seemed to exclude a standard OTE and pointed at a survival activity of CD95 and  
124 CD95L.

125 We therefore tested whether exogenously added recombinant CD95L protein could protect  
126 cells from the toxicity of CD95L-derived shRNAs. When NB7 cells were incubated with  
127 different concentrations of a soluble form of CD95L (S2), toxicity exerted by shL1 was not  
128 affected (**Figure 1A, left panel**). NB7 neuroblastoma cells were chosen for these experiments  
129 because they lack expression of caspase-8 (Teitz et al., 2000) and hence are completely resistant  
130 to the apoptosis inducing effects of CD95L. An ostensible moderate and dose-dependent  
131 protection was detected when cells were treated with a highly active leucine-zipper tagged  
132 CD95L (LzCD95L) (**Figure 1A, center panel**). However, this effect is likely due to the growth-  
133 promoting activities of soluble CD95L, which also significantly affected the growth of the cells  
134 expressing a scrambled control shRNA (seen for both S2 and LzCD95L). The recombinant  
135 LzCD95L protein was active, as demonstrated by its apoptosis-inducing capacity in CD95  
136 apoptosis sensitive MCF-7 cells (**Figure 1A, right panel**).

137 To test whether CD95L or CD95 proteins could protect cancer cells from death, we  
138 introduced silent mutations into the targeted sites of three very toxic shRNAs: shL1 and shL3  
139 (both targeting CD95L) and shR6 (targeting CD95). We first introduced eight silent mutations  
140 into the sites targeted by either shL1 or shL3 (**Figure 1B**) and expressed these proteins in NB7  
141 cells (**Figure 1C**). Both mutant constructs were highly resistant to knockdown by their cognate  
142 shRNA but still sensitive to knockdown by the other targeting shRNA (**Figure 1C**).  
143 Overexpression of these shRNA-resistant versions of the CD95L ORF did not protect the cells  
144 from shL1 or shL3, respectively (**Figure 1D**). Interestingly, expression of full length CD95L  
145 slowed down the growth of the NB7 cells right after infection with the lentivirus despite the  
146 absence of caspase-8 (data not shown). Infection with shRNAs was therefore performed 9 days  
147 after introducing CD95L when the cells had recovered and expressed significant CD95L protein  
148 levels (**Figure 1C**). We then mutated the CD95 mRNA in the targeted site of shR6 (**Figure 1E**).  
149 Neither expression of wild-type (wt) nor mutated (MUT) CD95 in MCF-7 cells (**Figure 1F**)  
150 reduced the toxicity when cells were infected with the pLKO-shR6 or another toxic lentiviral  
151 shRNA, pLKO-shR7 (**Figure 1G**). These data suggested that neither exogenously added  
152 recombinant CD95L or exogenously expressed CD95L or CD95 protein can protect cells from  
153 toxic shRNAs derived from these genes.

154 To determine whether we could prevent cancer cells from dying by this form of cell death by  
155 deleting the endogenous targeted sites, we used CRISPR/Cas9 gene-editing to excise sites  
156 targeted by different shRNAs and siRNAs in both alleles of the CD95 and CD95L genes. We  
157 first deleted a 41 nt piece of the CD95L gene in 293T cells, that contained the target site for shL3  
158 (**Figure 2A, 2C**). While internal primers could not detect CD95L mRNA in three tested clones,  
159 primers outside of the deleted area did detect CD95L mRNA (**Figure 2D**, and data not shown).  
160 Three clones with this shL3  $\Delta$ 41 deletion were pooled and tested for toxicity by shL3 expressed  
161 from a Tet-inducible plasmid (pTIP-shL3). Compared to a pool of control cells transfected only  
162 with the Cas9 plasmid, the 293T shL3  $\Delta$ 41 cells were equally sensitive to the toxic shRNA  
163 (**Figure 2G**). This was also observed when the clones were tested individually (data not shown).

164 To exclude the possibility that shL3 was inducing cell death due to a unique activity of shL3  
165 and/or 293T cells, we deleted the same 41 nt in CD95L in the ovarian cancer cell line HeyA8;  
166 We also generated HeyA8 clones in which we either removed a 64 nt region containing the target  
167 site for the siRNA siL3 in the CD95L coding sequence or a 227 nt region containing the target  
168 site for shR6 in CD95 (**Figure 2A, 2B** and **Figure 2 - figure supplement 1**). In all cases,

169 homozygous deletions were generated (**Figure 2E**). To confirm the deletion of the shR6 target  
170 site, we infected HeyA8 cells treated with the Cas9 plasmid only and HeyA8 with a homozygous  
171 deletion of the shR6 site with shR6 and, as positive controls, with shR2 (targeting the CD95  
172 ORF) and shR6' (targeting the CD95 3'UTR). Five days after infection, CD95 mRNA was  
173 quantified by real time PCR using a primer located outside the 227bp deletion (**Figure 2F**). The  
174 mutated CD95 mRNA was still detectable in the shR6  $\Delta$ 227 cells. While shR2 and shR6' (both  
175 targeting outside the deleted region) caused knockdown of CD95 mRNA in both the Cas9  
176 expressing control and the shR6  $\Delta$ 227 cells, shR6 could only reduce mRNA expression in the  
177 Cas9 control cells. These data document that HeyA8 CD95 shR6  $\Delta$ 227 cells no longer harbor the  
178 sequence targeted by shR6.

179 Now having HeyA8 cells lacking one of three RNAi-targeted sites in either CD95 or CD95L,  
180 we could test the role of the CD95 and CD95L gene products in protecting HeyA8 cells from the  
181 death induced by either shRNA (shL3 and shR6, two different vectors: pLKO or the Tet  
182 inducible pTIP) or the siRNA siL3. In all cases, the shRNA or siRNA that targeted the deleted  
183 region was still fully toxic to the target-site deleted cells (**Figure 2H** and **2I**). We saw efficient  
184 growth reduction and cell death in siL3 site deleted cells transfected with as little as 1 nM siL3  
185 (**Figure 2I**, and data not shown). These data firmly establish that cells were not dying due to the  
186 knockdown of either CD95 or CD95L.

187

### 188 **Involvement of canonical RNAi**

189 shRNAs and early generation naked siRNAs showed general toxicity when introduced in large  
190 amounts, presumably by eliciting an interferon (IFN) response (Marques & Williams, 2005) or  
191 by saturating the RISC (Grimm et al., 2006). However, both chemically modified siRNAs at very  
192 low concentrations and lentiviral shRNAs at an MOI<1 were still toxic (data not shown). We  
193 therefore decided to test whether the observed toxicity involved canonical RNAi and activity of  
194 the RISC. To test shRNAs or siRNAs targeting CD95L, we introduced the Venus-CD95L sensor  
195 (inset in **Figure 3A**, right panel) into HeyA8 CD95 protein k.o. cells we had generated in the  
196 process of deleting the shR6 site (**Figure 2 - figure supplement 1**, clone # 2 was used for the  
197 following studies; see figure legend for strategy and characterization of the clones). While  
198 double-stranded (ds)-siL3 effectively silenced Venus expression and induced toxicity, neither the  
199 sense nor the antisense single-stranded (ss)RNAs significantly decreased Venus expression or  
200 induced toxicity (**Figure 3A**). In addition, no activity was found when ds-siL3, synthesized as

201 deoxyribo-oligonucleotides, was transfected into the cells (**Figure 3B**). Using this type of  
202 analysis, we tested a number of modified siRNAs for RNAi activity and toxicity. For siRNAs to  
203 be fully active they require 3' overhangs on both strands (Bernstein, Caudy, Hammond, &  
204 Hannon, 2001). Converting siL3 to a blunt-ended duplex resulted in substantial loss of RNAi  
205 activity and toxicity (**Figure 3C**). Due to the topology of the RISC, siRNA activity is decreased  
206 by modification of the 5' end of the antisense/guide strand (Chiu & Rana, 2003). To test whether  
207 cell death induced by siL3 would be affected by a bulky modification, we placed a Cy5 moiety at  
208 any of the four possible ends of the siL3 duplex. Only when the siL3 duplex carried a 5'  
209 modification in the guide strand did it prevent RNAi activity and toxicity; modifications in the  
210 three other positions had no effect (**Figure 3C**). This was confirmed for another siRNA, siL2. To  
211 test whether the toxicity of siL3 required association with a macromolecular complex, which  
212 would be consistent with RISC involvement, we performed a competition experiment. HeyA8  
213 cells were transfected with 10 nM of siL3, and a mutated nontoxic oligonucleotide, siL3MUT,  
214 was titrated in (**Figure 3D**). siL3MUT reduced the growth inhibitory activity of siL3 in a dose-  
215 dependent fashion suggesting that siL3 and siL3MUT compete for the same binding site in the  
216 cells, pointing at involvement of the RISC.

217 To determine involvement of RNAi pathway components in the toxicity of CD95 and  
218 CD95L-derived sequences, we tested HCT116 cells deficient for either Drosha or Dicer (Y. K.  
219 Kim, Kim, & Kim, 2016). Growth of parental HCT116 cells was impaired after infection with  
220 shL3 or shR6 viruses (**Figure 3E**, left panel). Consistent with the requirement of Dicer to  
221 process shRNAs, Dicer<sup>-/-</sup> cells were completely resistant to the toxic shRNAs (**Figure 3E**, center  
222 panel). This was also supported by the inability of shR6 to silence CD95 protein expression in  
223 these cells (**Figure 3F**). Dicer<sup>-/-</sup> cells were not resistant to toxic siRNAs as these cells died when  
224 transfected with siL3, which is consistent with mature siRNAs not needing further processing by  
225 Dicer (**Figure 3G**, center panel). Interestingly, Drosha<sup>-/-</sup> cells were hypersensitive to the two  
226 toxic shRNAs (**Figure 3E**, right panel,  $p < 0.0001$ , according to a polynomial fitting model), and  
227 shR6 efficiently knocked down CD95 expression in Drosha<sup>-/-</sup> cells (**Figure 3F**). Both Drosha<sup>-/-</sup>  
228 and Dicer<sup>-/-</sup> cells were much more susceptible to the toxicity induced by siL3 than parental cells  
229 (**Figure 3G**, center and right panel,  $p < 0.0001$ , according to a polynomial fitting model). The  
230 hypersensitivity of the Drosha<sup>-/-</sup> cells to toxic si/shRNAs and of Dicer<sup>-/-</sup> cells to toxic siRNAs can  
231 be explained by Drosha<sup>-/-</sup> and Dicer<sup>-/-</sup> cells allowing much more efficient uptake of mature toxic

232 RNAi-active species into the RISC because they are almost completely devoid of competing  
233 endogenous miRNAs (Y. K. Kim et al., 2016).

234 To determine the contribution of the siRNA seed sequence to their toxicity, we generated a  
235 set of chimeric siRNAs in which we systematically replaced nucleotides of the toxic siL3 siRNA  
236 with nucleotides of a nontoxic scrambled siRNA. We did this starting either from the seed end or  
237 from the opposite end (**Figure 3H**). HeyA8 cells expressing both the Venus-CD95L sensor (to  
238 monitor level of knockdown) and a Nuc-Red plasmid to fluorescently label nuclei (to monitor the  
239 effects on cell growth) were transfected with 5 nM of the chimeric siRNAs; total green  
240 fluorescence and the number of red fluorescent nuclei were quantified over time. The siL3  
241 control transfected cells showed an almost complete suppression of the green fluorescence and  
242 high toxicity. In the top panel of **Figure 3H**, the data are summarized in which siL3 nucleotides  
243 were stepwise replaced with siScr nucleotides from the seed sequence end. Both RNAi and  
244 toxicity were profoundly reduced when three of the terminal siL3 nucleotides were replaced with  
245 the siScr nucleotides in those positions, suggesting the seed region (6mer highlighted in blue) is  
246 critical for both activities. Consistently, as shown in the bottom panel of **Figure 3H**, when siL3  
247 nucleotides were replaced with siScr nucleotides from the non-seed end, neither RNAi nor the  
248 toxicity was diminished until replacements affected residues in the seed region. These data  
249 suggest the 6mer seed sequence of siL3 was critical for both RNAi activity and its toxicity.

250

### 251 **Toxic si/shRNAs cause downregulation of survival genes**

252 A general OTE by RNAi has been reported (Birmingham et al., 2006; Jackson et al., 2006; Lin et  
253 al., 2005). However, this was been found to cause toxicity in most cases, and the targeted  
254 mRNAs were difficult to predict (Birmingham et al., 2006). The fact that 22 of the tested CD95  
255 and CD95L-targeting sh- and si/DsiRNAs were toxic to many cancer cells evoking similar  
256 morphological and biological responses (Hadjji et al., 2014) generated a conundrum: Could an  
257 OTE trigger a specific biology? To test this, we expressed two toxic shRNAs - one targeting  
258 CD95L (shL3) and one targeting CD95 (shR6) - in cells lacking their respective target sequences  
259 and subjected the RNA isolated from these cells to an RNA-Seq analysis. In order to detect  
260 effects that were independent of cell type, delivery method of the shRNA, or targeted gene, we  
261 expressed shL3 in 293T ( $\Delta$ shL3) cells using the Tet-inducible vector pTIP and shR6 in HeyA8  
262 ( $\Delta$ shR6) cells using the pLKO vector. In each case, changes in RNA abundance were compared  
263 to cells in which expressing a non-targeting shRNA in matching vectors. Total RNA was



264 harvested in all cases at either the 50-hour time point (before the onset of cell death) or at the  
265 100-hour time point (during cell death) (**Figure 4A**). To achieve high stringency, the data were  
266 then analyzed in two ways: first, using a conventional alignment-based analysis to identify genes  
267 for which the mRNA changed more than 1.5-fold (and an adjusted p-value of less than 0.05) and  
268 second, by a read-based method, in which we first identified all reads that changed >1.5-fold and  
269 then subjected each read to a BLAST search to identify the gene it was derived from. Only  
270 RNAs that were detected by both methods were considered (**Supplementary File 1**). The  
271 combination of the analyses resulted in one mRNA that was upregulated and 11 mRNAs that  
272 were downregulated (**Figure 4B**). Using an arrayed qPCR approach, most of these detected  
273 mRNA changes were validated for both cell lines (**Figure 4 - figure supplement 1A**).  
274 Interestingly, for nine of the eleven genes, published data suggest they are either highly  
275 upregulated in cancer and/or critical for the survival of cancer cells, as their inhibition or  
276 knockdown resulted in either growth reduction or induction of various forms of cell death (see  
277 legend of **Figure 4 - figure supplement 1** for details). Significantly, six of these eleven  
278 downregulated genes were recently identified in two independent genome-wide RNAi lethality  
279 screens to be critical for cancer cell survival (Blomen et al., 2015; Wang et al., 2015) (**Figure 4B**  
280 and **Figure 4 - figure supplement 1B**) (**Supplementary File 2**). Considering these two screens  
281 only identified 6.6% of human genes to be critical for cell survival, we found a significant  
282 enrichment (54.5%, p-value =  $3 \times 10^{-6}$  according to binomial distribution) of these survival genes  
283 among the genes downregulated during the cell death induced by either shL3 or shR6. All six  
284 survival genes are either highly amplified or mutated in human cancers (**Figure 4 - figure**  
285 **supplement 2A**). In addition to these six genes, GNB1 and HIST1H1C were reported to be  
286 required fitness genes in a recent high-resolution CRISPR-based screen (Hart et al., 2015). A  
287 kinetic analysis showed most of the deregulated mRNAs were downregulated early with a  
288 significant effect already at 14 hours, more than two days before the onset of cell death (**Figure 4**  
289 **- figure supplement 1C** and data not shown). This suggested the cells were dying because of the  
290 silencing of multiple critical survival genes, providing an explanation for why multiple cell death  
291 pathways were activated. We therefore call this type of cell death DISE (for Death Induced by  
292 Survival gene Elimination).

293 To confirm some of the downregulated genes were also critical survival genes for HeyA8  
294 cells, we transfected HeyA8 cells with siRNA SmartPools targeting each of the eleven genes.  
295 Individual knockdown of seven of the targeted genes resulted in reduced cell growth when

296 compared to cells transfected with a pool of scrambled siRNAs (**Figure 4C**). To mimic the  
297 effect of the CD95 and CD95L-derived shRNAs, we treated HeyA8 cells with a combination of  
298 siRNA pools targeting these seven genes. Remarkably, 1 nM of this siRNA mixture (35.7 pM of  
299 each individual siRNA) was sufficient to effectively reduce growth of the cells (**Figure 4 -**  
300 **figure supplement 2B**) and also cause substantial cell death (**Figure 4 - figure supplement 2C**),  
301 suggesting it is possible to kill cancer cells with very small amounts of siRNAs targeting a  
302 network of these survival genes.

303 To test the generality of this phenomenon, we inducibly expressed another CD95L derived  
304 shRNA, shL1, in 293T cells using the pTIP vector, and transfected HeyA8 cells with 25 nM  
305 siL3. We subjected the cells to RNA-Seq analysis 100 hours and 48 hours after addition of Dox  
306 or after transfection, respectively. To determine whether survival genes were downregulated in  
307 all cases of sh/siRNA induced cell death, we used a list of 1883 survival genes and 423 genes not  
308 required for survival (nonsurvival genes) recently identified in a CRISPR lethality screen  
309 (**Supplementary File 2**). We subjected the four ranked RNA-Seq data sets to a gene set  
310 enrichment analysis using the two gene sets (**Figure 4D**). In all cases, survival genes were  
311 significantly enriched towards the top of the ranked lists (most downregulated). In contrast,  
312 nonsurvival genes were not enriched. One interesting feature of DISE that emerged was the  
313 substantial loss of histones. Of the 16 genes that were significantly downregulated in cells treated  
314 with any of the four sh/siRNAs, 12 were histones (**Figure 4E**). While it might be expected that  
315 dying cells would downregulate highly expressed genes such as histones, we believe that losing  
316 histones is a specific aspect of DISE because a detailed analysis revealed the downregulated  
317 histones were not the most highly expressed genes in these cells (**Figure 4 - figure supplement**  
318 **3**). In addition, almost as many genes with similarly high expression were found to be  
319 upregulated in cells after DISE induction.

320 A Metascape analysis revealed genes involved in mitotic cell cycle, DNA conformation  
321 change, and macromolecular complex assembly were among the most significantly  
322 downregulated across all cells in which DISE was induced by any of the four sh/siRNAs (**Figure**  
323 **4F**). These GO clusters are consistent with DISE being a form of mitotic catastrophe with cells  
324 unable to survive cell division (Hadji et al., 2014) and suggest a general degradation of  
325 macromolecular complexes.

326

327 **Toxic si/shRNAs target survival genes in their 3'UTR**

328 To test whether the toxic shRNAs directly targeted genes through canonical RNAi, we  
329 subjected the two gene lists obtained from the RNA-Seq analysis (the cell lines treated with  
330 either shL3 or shR6 at the 50 hour time point) to a Sylamer analysis (van Dongen, Abreu-  
331 Goodger, & Enright, 2008) designed to find an enrichment of miRNA/siRNA targeted sites in  
332 the 3'UTR of a list of genes ranked according to fold downregulation (**Figure 5A**). This analysis  
333 identified a strong enrichment of the cognate seed match for shL3 and shR6 in cells treated with  
334 either of these two shRNAs. The analyses with cells treated with shRNAs for 100 hours looked  
335 similar but less significant, suggesting early targeting by the shRNAs followed by secondary  
336 events (data not shown). Enrichment in 6mers and 8mers were both detected (only 8mers shown)  
337 in the 3'UTRs but not the ORF of the ranked genes (data not shown).

338 Interestingly, the seed matches detected by the Sylamer analysis were shifted by one  
339 nucleotide from the expected seed match based on the 21mer coded by the lentivirus. RNA-Seq  
340 analysis performed for the small RNA fraction confirmed in all cases (shScr and shL3 in pTIP,  
341 and shScr and shR6 in pLKO), the shRNAs in the cells were cleaved in a way resulting in the  
342 predominant formation of an siRNA shifted one nucleotide away from the shRNA loop region  
343 (black arrow heads in **Figure 5 - figure supplement 1A**). This allowed us to design toxic mature  
344 siRNAs based on the sequences of shL3 and shR6. These shRNA-to-siRNA converts were toxic  
345 to HeyA8 cells (**Figure 5 - figure supplement 1B**) confirming that the observed toxicity was not  
346 limited to the TRC shRNA platform, but based on a sequence-specific activity of the si/shRNAs.

347 The generalizability of the Sylamer results for shL3 and shR6 was tested with cells treated  
348 with either shL1 or siL3. In both cases, when the ranked RNA Seq data were subjected to a  
349 Sylamer analysis, the seed matches of the si/shRNA introduced were again significantly enriched  
350 in the 3'UTR of downregulated RNAs (**Figure 5 - figure supplement 2**). In none of the Sylamer  
351 analyses of the four data sets, did we see enrichment of seed matches in the 3'UTRs of  
352 downregulated RNAs that matched the passenger strand. In all cases, the only significantly  
353 enriched sequences matched the seed sequences in the guide strand of the si/shRNAs we  
354 introduced.

355 Our data suggested that DISE inducing si/shRNAs caused an early loss of survival genes, and  
356 at the same time downregulated RNAs through canonical RNAi targeting their 3'UTR. However,  
357 it was not clear whether the most highly downregulated survival genes were targeted in their  
358 3'UTR by RNAi-active sequences. We determined as little as 6 nucleotides dictated whether an  
359 siRNA killed cancer cells (see **Figure 3H**). 10 of the 11 targeted genes identified in the RNA-

360 Seq analysis described in **Figure 4A and 4B** contained multiple 6mer seed matches for either  
361 shL3 and/or shR6 (**Figure 5B**). It is therefore likely the two shRNAs, shL3 and shR6, killed cells  
362 by targeting a network of genes enriched in critical survival genes through RNAi. The only gene  
363 without an shL3 or shR6 seed match was HIST1H1C. Interestingly, only four of the histones  
364 downregulated in cells after treatment with any of the four tested sh/siRNAs had a 3'UTR  
365 (underlined in **Figure 4E**) suggesting that most histones were not directly targeted by the  
366 sh/siRNAs.

367 Using multiplex qPCR, we tested whether other toxic shRNAs targeting either CD95 or  
368 CD95L also caused downregulation of some of the 11 genes silenced by shL3 and shR6. HeyA8  
369 cells were transfected with the toxic siRNA siL3 (RNA harvested at 80 hours) or the toxic  
370 shRNAs shL1, shL3 or shR7 (RNA harvested at 100 hrs.). While shL1 did not have much of an  
371 effect on the expression of these genes, shR7 caused downregulation of 7 of 11 of the same  
372 genes targeted by shL3 even though the 6mer seed matches of the two shRNAs are very different  
373 (CTTTGT for shL3 and GGAGGA for shR7) (**Figure 4 - figure supplement 1D**).

374 To determine whether preferential targeting of survival genes was responsible for the death  
375 of the cells, we tested whether there was an association between the presence or absence of a  
376 predicted seed match in the 3'UTR for the si/shRNA introduced and whether a gene would be  
377 downregulated ( $>1.5$  fold downregulated,  $p < 0.05$ ) among survival genes using the Fisher's Exact  
378 test (**Figure 5C**). In almost all cases, this analysis revealed that survival genes containing a  
379 predicted seed match in their 3'UTR were statistically more likely to be downregulated than  
380 survival genes without such a motif. The analysis with shL1 treated cells did not reach statistical  
381 significance, likely due to the fact that this shRNA was found to be very toxic and the 100 hour  
382 time point may have been too late to observe evidence of significant targeting. This  
383 interpretation is supported by the observation that the significance for both shL3 and shR6 to  
384 target survival genes was higher at 50 hours when compared to the 100 hour time points (**Figure**  
385 **5C**) and that the Sylamer analysis of the shL1 treated cells was less significant after 100 hours of  
386 treatment than any of the other Sylamer analyses (**Figure 5 - figure supplement 2**).

387 Now that we had established that the toxicity of the studied shRNAs involved targeting of  
388 survival genes rather than CD95 or CD95L we had to assume that when studying a larger set of  
389 shRNAs that the level of knockdown of the targeted genes and the toxicity were not strictly  
390 correlated. This was confirmed for the TRC shRNAs targeting the ORF or 3'UTR of CD95 in  
391 CD95 high expressing HeyA8 cells (**Figure 5 - figure supplement 3**). While some of the toxic

392 shRNAs efficiently silenced CD95 (i.e. shR6 and shR2) others did not (i.e. shR5). In  
393 summary, our analyses suggest that cells die by DISE due to an early and selective silencing of  
394 survival genes through targeting seed matches in their 3'UTR followed by the downregulation of  
395 histones.

396

### 397 **Identification of toxic shRNAs in the CD95L and CD95 mRNAs**

398 The majority of commercially available si- Dsi-, and shRNAs targeting either CD95 or CD95L  
399 were highly toxic to cancer cells. We therefore asked whether these two genes contained  
400 additional sequences with similar activity. To test all shRNAs derived from either CD95L or  
401 CD95, we synthesized all possible shRNAs, 21 nucleotides long, present in the ORF or the  
402 3'UTR of either CD95L or CD95 starting with the first 21 nucleotides after the start codon, and  
403 then shifting the sequence by one nucleotide along the entire ORF and 3'UTR (**Figure 6A**). We  
404 also included shRNAs from a gene not expressed in mammalian cells and not expected to  
405 contain toxic sequences, Venus. All 4666 oligonucleotides (700 Venus, 825 CD95L ORF, 837  
406 CD95L 3'UTR, 987 CD95 ORF, and 1317 CD95 3'UTR shRNAs) were cloned into the Tet-  
407 inducible pTIP vector (**Figure 6B**) as five individual pools. We first tested the activity of each  
408 individual pool to be toxic and to target the Venus sensor protein (fused to either the ORF of  
409 CD95 or CD95L). NB7 cells were again used because of their resistance to the Venus-CD95L  
410 sensor which was found to be slightly toxic to CD95 apoptosis competent cells. NB7-Venus-  
411 CD95L cells infected with the Venus-targeting shRNA pool showed some reduction in  
412 fluorescence when Dox was added, however, the shRNA pool derived from the CD95L ORF was  
413 much more active in knocking down Venus (**Figure 6 - figure supplement 1A**). No significant  
414 green fluorescence reduction was detected in cells after infection with the shRNA pool derived  
415 from the CD95L 3'UTR since the targeted sequences were not part of the sensor. Similar results  
416 were obtained when NB7-Venus-CD95 cells were infected with the Venus, CD95 ORF, and  
417 CD95 3'UTR targeting shRNA pools. To determine their ability to reduce cell growth (as a  
418 surrogate marker for toxicity), we infected NB7 parental cells with each of the five pools  
419 (parental cells were used for this experiment to avoid a possible sponge effect by expressing  
420 either CD95L or CD95 sequences that were part of the Venus sensors). Interestingly, the pool of  
421 700 shRNAs derived from Venus did not cause any toxicity (**Figure 6 - figure supplement 1B**).  
422 In contrast, the pool of the shRNAs derived from CD95L significantly slowed down growth,  
423 while no toxicity was observed when cells were infected with the pool of shRNAs derived from

424 the CD95L 3'UTR. In the case of CD95, both the shRNAs derived from the ORF and the  
425 3'UTR showed some toxicity. However, the shRNAs derived from the 3'UTR caused greater  
426 toxicity compared to those derived from the ORF. The data suggests that overall the shRNAs  
427 derived from the CD95L ORF and the CD95 3'UTR contain the most toxic sequences.

428 To determine the toxicity of each of the shRNAs in the pools, NB7 cells were infected with  
429 the libraries of shRNA viruses (MOI<1), and after puromycin selection cells were pooled 1:1:1  
430 (Venus ORF/CD95L ORF/CD95L 3'UTR pools or Venus ORF/CD95 ORF/CD95 3'UTR pools)  
431 to allow for competition between shRNAs when Dox was added (**Figure 6B**). Cells were  
432 cultured for 9 days with and without Dox to allow for cell death to occur. To identify depleted  
433 shRNAs, shRNA barcodes were detected through next generation sequencing of PCR products to  
434 determine the relative abundance of each shRNA in three pools: 1) the cloned plasmid libraries,  
435 2) cells after infection and culture for 9 days without Dox, and 3) cells infected and cultured with  
436 Dox for 9 days. A total of 71,168,032 reads were detected containing a complete sequence of one  
437 of the cloned shRNAs. Virtually all shRNAs were substantially represented in the cloned  
438 plasmids (**Supplementary File 3**). The shRNAs in the CD95L pool (comprised of the Venus,  
439 CD95L ORF, and CD95L 3'UTR subpools) and the CD95 pool (comprised of the Venus, CD95  
440 ORF, and CD95 3'UTR subpools) were ranked from highest (most toxic) to lowest  
441 underrepresentation. During this and subsequent analyses, we noticed in many cases, Dox  
442 addition did cause a reduction of shRNAs, indicating an increase in toxicity; however, in other  
443 instances, infection alone and without the addition of Dox was toxic. This effect was likely due  
444 to the well-described leakiness of the Tet-on system (Pham, Moretti, Goodall, & Pitson, 2008),  
445 which we confirmed for shR6 in NB7 cells (**Figure 6 - figure supplement 2A**). To capture all  
446 toxic shRNAs, we therefore decided to split the analysis into two halves: 1) the changes in  
447 abundance after infection compared to the composition in the plasmid pool (infection -Dox) and  
448 2) the changes in abundance after Dox addition compared to the infected -Dox cells (infection  
449 +Dox). In subsequent analyses shRNAs underrepresented after infection are either boxed  
450 (**Figure 6C**) or shown (**Figure 6D, 7B** and **Figure 7 - figure supplement 1B**) in blue and the  
451 ones underrepresented after Dox addition are either boxed or shown in orange. The results for all  
452 shRNAs are shown in **Figure 6 - figure supplement 2B**. Grey dots represent all shRNAs and red  
453 dots represent only the ones that were significantly underrepresented at least 5-fold.  
454 Interestingly, the highest abundance of downregulated shRNAs was found in the CD95L ORF  
455 and the CD95 3'UTR pools of shRNAs, which is consistent with the increased toxicity observed

456 when NB7 cells were infected with either of these two pools individually (see **Figure 6 -**  
457 **figure supplement 1B**). The shRNAs of these two toxic pools were highly enriched in the  
458 underrepresented shRNAs in the two pooled experiments (CD95L and CD95). Their toxicity was  
459 also evident when all shRNAs in each pool (2362 shRNAs in the CD95L and 3004 shRNAs in  
460 the CD95 pool) were ranked according to the highest fold downregulation (**Figure 6C**). The  
461 three subpools in each experiment are shown separately. Thus, again this analysis identified the  
462 ORF of CD95L and the 3'UTR of CD95 as the subpool in each analysis with the highest  
463 enrichment of underrepresented shRNAs (**Figure 6C**).

464 This analysis allowed us to describe the toxicity landscape of CD95L and CD95 ORFs and  
465 their 3'UTRs (**Figure 6D**). All shRNAs significantly underrepresented at least five-fold (red dots  
466 in **Figure 6 - figure supplement 2B**) are shown along the CD95L pool (**Figure 6D**, left) and the  
467 CD95 pool (**Figure 6D**, right) sequences. For both CD95L and CD95, toxic shRNAs localized  
468 into distinct clusters. The highest density of toxic sequences was found in the stretch of RNA  
469 that codes for the intracellular domain of CD95L (underlined in green in **Figure 6D**).

470

#### 471 **Predicting shRNA toxicity - the toxicity index (TI) and GC content**

472 Our data suggest toxic shRNAs derived from either CD95L or CD95 kill cancer cells by  
473 targeting a network of genes critical for survival through canonical RNAi. Therefore, we  
474 wondered how many 8mer seed sequences derived from these toxic shRNAs would have  
475 corresponding seed matches in the 3'UTR of critical survival genes in the human genome. Would  
476 it be possible to predict with some certainty in an *in silico* analysis what shRNAs would be toxic  
477 to cells? To calculate such a hypothetical toxicity index, we used the ranked CRISPR data set  
478 (Wang et al., 2015) with 1883 survival genes (SGs) and 423 nonSGs. Based on our RNA-Seq  
479 analyses, we hypothesized the survival genes contained more putative seed matches for toxic  
480 shRNAs in their 3'UTRs than the nonsurvival genes (**Figure 7A**, left) and that the number of  
481 seed matches in the 3'UTRs of survival genes divided by the number of seed matches in the  
482 3'UTR of nonsurvival genes would, to some extent, predict toxicity of an si/shRNA (**Figure 7A**,  
483 right).

484 To establish a Toxicity Index (TI) for each shRNA, we first gathered 3'UTR sequences for  
485 1846 of the survival genes and 416 of the nonsurvival genes. We then generated a list containing  
486 a normalized ratio of occurrences of every possible 8mer seed match in the 3'UTRs of the  
487 survival and non-survival gene groups. This resulted in a ratio for each of the 65,536 possible

488 8mer combinations (**Supplementary File 4**), the TI. We then assigned to each of the 4666  
489 shRNAs in our screen its TI, and ranked each pool within the two experiments of our screen  
490 according to the highest TI (red stippled lines in **Figure 7B**). We then further separated the  
491 shRNAs into two groups: those that were toxic just after infection and those toxic after addition  
492 of Dox (**Figure 7B, Supplementary File 5**). In each ranked list, we could now assess whether the  
493 experimentally determined toxicity of shRNAs correlated with the *in silico* predicted TI.  
494 Remarkably, the highest enrichment of toxic shRNAs was found amongst those with higher TI  
495 for the subpool of shRNAs targeting the CD95L ORF followed by shRNAs in the subpool  
496 targeting the CD95 3'UTR. To confirm the significance of this finding, we repeated the analysis  
497 10,000 times by randomly assigning 8mers and their associated TIs to the two shRNA pools and  
498 again sorted the data from highest to lowest TI. The reported p-values were calculated based on  
499 these permuted datasets using Mann-Whitney U tests.

500 We noticed that survival genes tend to be more highly expressed than nonsurvival genes  
501 (data not shown). To address the question whether toxic si/shRNAs only target survival genes or  
502 all genes that are highly expressed, we recalculated the TI based on a set of 850 highly expressed  
503 and expression matched survival and nonsurvival genes (**Figure 7 - figure supplement 1A**). This  
504 alternative TI tracked slightly less well with the toxic shRNAs we identified, but the enrichment  
505 of toxic shRNAs towards the top of the list ranked according to the new TI was still statistically  
506 significant (**Figure 7 - figure supplement 1B**). This analysis demonstrates survival genes contain  
507 more seed matches for toxic shRNAs in their 3'UTR than nonsurvival genes regardless of the  
508 expression level. This suggests, to a certain extent, it is possible to predict the experimental  
509 toxicity of shRNAs based on the *in silico* calculated TI.

510 Our data suggest DISE results from a sequence-specific off-target activity that depends on  
511 the presence of certain seed matches in the 3'UTR of survival genes. Thus, DISE inducing RISC  
512 associated small RNAs behave in manner similar to miRNAs. This raised the question whether  
513 these seed matches have special properties. While we did not find a sequence motif that was  
514 present in all toxic si/shRNAs, we did find that sequence composition, specifically GC content,  
515 which has been reported to affect the specificity of shRNAs (Gu et al., 2014; Ui-Tei et al., 2004),  
516 correlated with the toxicity of shRNAs. When the GC content of the 6mer seed sequences of all  
517 underrepresented shRNAs detected in the shRNA screen across the CD95L ORF was plotted we  
518 found a significant correlation between the GC content and higher toxicity (indicated by  
519 underrepresentation) (**Figure 7C and 7D**). This correlation was even more pronounced when



520 plotting GC content versus the 6mer toxicity index (*Supplementary File 4*) (*Figure 7E*).  
521 While not an absolute requirement, higher GC content made shRNAs more toxic, consistent  
522 with reports demonstrating that shRNAs with high GC content in the seed region showed  
523 decreased on-target and increased off-target activity (Gu et al., 2014; Ui-Tei et al., 2004). In  
524 summary, our data suggest that si- and/or shRNAs with certain seed sequences are toxic to  
525 cancer cells by targeting critical survival genes through an RNAi mechanism independent of  
526 both Drosha and Dicer. Furthermore, the data suggest high miRNA content, presumably through  
527 competing for occupancy in the RISC, might render cells less sensitive to DISE.  
528

529 **Discussion**

530 Most current uses of RNAi are aimed toward highly specific silencing with little OTE. In fact,  
531 OTEs represent one of the largest impediments to the use of RNAi in phenotypic screening  
532 applications. We now demonstrate DISE is a unique form of OTE that results in the simultaneous  
533 activation of multiple cell death pathways in cancer cells. The discovery that DISE involves loss  
534 of multiple survival genes now provides an explanation for the unique properties we described  
535 for this form of cell death, especially the observation that cancer cells have a hard time  
536 developing resistance to this cell death mechanism (Hadji et al., 2014; Murmann et al., 2017).

537

538 **DISE represents a specific form of RNAi OTE**

539 There are a number of rules that have been elucidated for designing si/shRNAs (Bramsen et al.,  
540 2009) to avoid undesired effects such as OTE (Petri & Meister, 2013), general toxicity due to the  
541 presence of toxic sequence motifs (Fedorov et al., 2006; Petri & Meister, 2013),  
542 poisoning/saturating of the RISC (Grimm et al., 2006), or evocation of an IFN response  
543 (Marques & Williams, 2005). The following arguments and evidence support our prediction that  
544 DISE is a manifestation of a novel, functionally important, conserved mechanism of genome  
545 regulation, and not the result of one of the above-mentioned effects:

546 1) The sheer number of toxic shRNAs embedded in CD95L or CD95. A number of genome-wide  
547 shRNA and siRNA lethality screens have revealed that 2-5% of shRNAs targeting human  
548 genes are toxic to cells. We recently reported in 12 independent arrayed shRNA lethality  
549 screens the identification of 651 genes out of about 18,000 targeted genes that are critical for  
550 the survival of 8 different cancer cell lines (Hadji et al., 2014). Many of the genes targeted by  
551 these shRNAs were actually established survival genes (as discussed in (Hadji et al., 2014)).  
552 That means that the number of shRNAs that are toxic due to a possible OTE or general  
553 toxicity would be expected to be very small. In contrast, we found that >80% of the shRNAs  
554 and siRNAs that were designed to target either CD95 or CD95L exhibited toxicity in multiple  
555 cell lines. Consistent with our data analysis a parallel genome-scale loss of function screen  
556 confirmed that the majority of the tested shRNAs derived from either CD95L and CD95 were  
557 toxic to a majority of the tested 216 cell lines when used as a pooled library (Cowley et al.,  
558 2014). These also included a number of hematopoietic cell lines suggesting that the DISE  
559 effect is not limited to solid cancers. Interestingly, in this study the authors did not consider  
560 the data on most of the CD95L and CD95 targeting shRNAs to be significant as they received

561 a low consistency score. A high consistency score predicts the observed phenotype (cell  
562 death or growth reduction in this case) is caused by knocking down the targeted gene (Shao et  
563 al., 2013). However, we have demonstrated here that the toxicity of an shRNA is solely  
564 dependent on its seed and the transcriptome of the treated cells. Therefore, the results of every  
565 shRNA should be considered individually as far as the DISE inducing effect is concerned.

566 2) High concentrations of siRNAs can saturate the RISC, preventing the access of crucial  
567 endogenous miRNAs (Khan et al., 2009). We have demonstrated that, in general, 5 nM of  
568 CD95L-derived siRNAs are sufficient to kill cancer cells. We have even seen very efficient  
569 cell death with as little as 1 nM of siRNA (see *Figure 2I and Figure 1 - figure supplement*  
570 *2E*). It is therefore unlikely we are poisoning the RISC. It has been reported that in siRNA  
571 overexpression experiments, changes in mRNA expression can be caused by blocked access  
572 of endogenous miRNAs to the RISC, such as the highly expressed miRNA family, let-7  
573 (Khan et al., 2009). However, we can exclude such an effect in our analysis, as there was no  
574 significant enrichment (or depletion) of the let-7 seed match motif (or that of any other  
575 miRNA) in our analyses (black lines in *Figure 5A*).

576 3) No IFN response was observed. We have performed multiple RNA-Seq and gene array  
577 analyses of cells in which DISE was induced by multiple si/shRNAs targeting CD95 or  
578 CD95L. In none of these analyses did we detect an increase in any of the known IFN response  
579 genes (Schoggins et al., 2011) (data not shown). In addition, we demonstrated the latest  
580 generation of Dicer optimized 27mer DsiRNAs that do not elicit an IFN response (D. H. Kim  
581 et al., 2005) and the shRNAs expressed from within the cells shown to have low IFN  
582 triggering activity (Robbins et al., 2006) have the same toxic activities as the standard 21mer  
583 siRNAs (see *Figure 1 - figure supplement 1A and 1B*).

584 4) Mutation of just one position destroys activity. A major argument against DISE toxicity being  
585 caused by overloading the RISC, an IFN response or the presence of known toxic sequences,  
586 lies in the analysis of the chimeras we generated between siL3 and a non-toxic scrambled  
587 oligonucleotide (see *Figure 3H*). This analysis demonstrated that the seed match positions of  
588 siL3 are critical for its toxicity. In fact, just replacing one nucleotide in a critical position in  
589 the center of the seed match almost completely abolished toxicity of the siRNA.

590

591 **What are the requirements for an si/shRNA to induce DISE?**

592 Our data provide strong evidence that the toxicity observed is a sequence-specific event  
593 caused by seed matches present in the targets of the toxic si/shRNAs rather than by a toxic motif  
594 enriched in all toxic si/shRNAs (i.e. the UGGC motif described before (Fedorov et al., 2006)).  
595 We did find a correlation between the toxicity of shRNAs (both predicted by the TI and  
596 experimentally determined in the shRNA screen) and the GC content in their seed region. While  
597 this correlation was significant, it was not a requirement as some of the most toxic si- and  
598 shRNAs had a low 8mer seed GC content (shL3, 25%; shR6, 25%; siL3, 37.5%). Our data  
599 suggests that survival genes may contain different types of seed matches (based on base  
600 composition or sequence) when compared to nonsurvival genes. Such a distinction has indeed  
601 been described before (Stark, Brennecke, Bushati, Russell, & Cohen, 2005). In a study in  
602 *Drosophila*, it was determined that survival genes are depleted of seed matches targeted by  
603 highly expressed miRNAs. These authors concluded that evolution must have selected against  
604 the presence of seed matches for highly expressed miRNAs in the 3'UTR of survival genes. It is  
605 therefore not surprising that a gene ontology (GO) analysis of all miRNA targets (the "targets")  
606 in this study described these genes as being involved in development and differentiation (Stark et  
607 al., 2005). In contrast, genes not targeted by miRNAs (the "antitargets") grouped in GO clusters  
608 that were consistent with cell survival (Stark et al., 2005). A similar phenomenon was also  
609 shown in mammalian cells; genes with fewer miRNA target sites, as predicted by Targetscan,  
610 contained distinct enriched GO terms from those enriched in genes with many predicted target  
611 sites. The genes with fewer sites were enriched in GO terms like ribosomal subunits and  
612 respiratory chain, whereas target-heavy genes were more enriched in regulatory-related GO  
613 terms (Zare, Khodursky, & Sartorelli, 2014). It is possible the DISE inducing si/shRNAs carry  
614 seed sequences that preferentially target seed matches present in the 3'UTRs of the "anti-  
615 targets". However, as our data on the miR-30 based shRNAs suggest, DISE-inducing shRNAs  
616 must be expressed at a certain level to be toxic.

617

### 618 **DISE is caused by loading of the guide strand of toxic si/shRNAs into the RISC**

619 Part of our data was generated using a widely used first generation stem loop shRNA platform,  
620 the TRC library. The TRC shRNAs have recently been found to be prone to cause OTE. Gu *et al.*  
621 showed that the loop design of this system results in imprecise Dicer cleavage and, consequently,  
622 the production of different mature small-RNA species that increase passenger loading, one major  
623 source of OTE (Gu et al., 2012). More recently it was reported that most guide RNAs derived

624 from the TRC hairpin were shifted by 4 nt 3' of the expected 5' start site (Watanabe, Cuellar,  
625 & Haley, 2016). While we did see a shift in processing of these stem loop shRNAs, we did not  
626 see such a high level of imprecision in the cleavage of our toxic shRNAs. In fact, 99.4% of the  
627 shR6 guide RNAs started at the same nucleotide position (**Figure 5 - figure supplement 1A**).  
628 The majority of the processing of both our pTIP and pLKO-based shRNAs was shifted by one  
629 nucleotide (**Figure 5 - figure supplement 1A**). This shift was consistent with the defined seed  
630 matches that were detected in the Sylamer analyses. In general, one major seed match was  
631 detected with one other minor species (this was less obvious for shL1, **Figure 5 - figure**  
632 **supplement 2**). Furthermore, all four Sylamer analyses only detected enrichments in the 3'UTR  
633 of downregulated mRNAs that were consistent with only the guide strand targeting the mRNA  
634 and not the passenger strand. In all cases, including in cells transfected with the siRNA siL3, the  
635 primary enriched sequence motifs were either 7, or 8mers present in the 3'UTR of the targeted  
636 mRNAs.

637

### 638 **DISE has features of the RNAi OTE previously reported**

639 Our data on DISE are consistent with a number of properties of RNAi OTE that have previously  
640 been reported. Similar to DISE, OTE mediated silencing requires a 6/7nt seed sequence of  
641 complementarity (Birmingham et al., 2006; Jackson et al., 2006; Lin et al., 2005) and it targets  
642 mRNAs in the 3'UTR (Birmingham et al., 2006). Our data on shRNAs, siRNAs, and DsiRNAs  
643 suggest that DISE is not limited to one platform and requires sequence specific targeting. This  
644 conclusion is also consistent with a previous report that suggested that sequence-dependent off-  
645 target transcript regulation is independent of the delivery method (Jackson et al., 2006). The  
646 authors found the same enrichment of 6mers and 7mers in 3'UTRs of targeted mRNAs for  
647 siRNAs and shRNAs (Jackson et al., 2006).

648

### 649 **The role of Dicer in DISE**

650 We previously reported that Dicer<sup>Exo5<sup>-/-</sup></sup> HCT116 cells (with deleted Exon 5) were at least as  
651 sensitive to induction of DISE (by either shL3 or shR6) than wt cells suggesting that Dicer  
652 deficient cells could be killed by DISE (Hadji et al., 2014). It has been reported that these  
653 Dicer deficient cells are hypomorphs (Ting et al., 2008) and indeed, we detected low residual  
654 Dicer expression by Western blotting (Hadji et al., 2014). We have now revisited this issue with  
655 HCT116 cells rendered completely deficient for Dicer using CRISPR/Cas9 gene editing (Y. K.

656 Kim et al., 2016). The fact that these Dicer<sup>-/-</sup> cells were now completely resistant to the toxic  
657 effects of shL3 or shR6 demonstrates the complete absence of Dicer protein and activity. Similar  
658 to the Drosha<sup>-/-</sup> cells, in the absence of mature miRNAs, which seem to attenuate DISE, Dicer<sup>-/-</sup>  
659 cells are hypersensitive to DISE induced by siRNAs.

660

### 661 **Open questions regarding the relevance of DISE**

662 We are proposing an entirely new concept of killing cancer cells that is based on the toxicity of  
663 CD95 and CD95L derived small RNAs. Naturally, there are many open questions such as:

664 1) Is DISE part of an anti-cancer mechanism? We are proposing that DISE kills cancer cells  
665 in a way that they usually cannot escape from. We have not found a way to block cancer cells  
666 from dying by DISE. We provide strong evidence to suggest this is due to the simultaneous  
667 targeting of multiple survival genes that result in the activation of multiple cell death pathways.  
668 It will be difficult to prove cells are dying due to the preferential targeting of survival genes. It  
669 may never be possible to express multiple siRNA resistant survival genes at the same time at  
670 physiological levels to render cancer cells resistant to the action of countless small RNAs. This  
671 prediction alone makes DISE a promising new strategy to kill cancer cells.

672 2) Does CD95L induce DISE *in vivo*? We recently found that overexpression of the CD95L  
673 ORF is toxic to cancer cells and that this kills cancer cells in a manner very similar to DISE  
674 induction (unpublished data). We and others have noticed upregulation of CD95L in multiple  
675 stress related conditions such as treatment with chemotherapy ((Friesen, Fulda, & Debatin, 1999)  
676 and data not shown). While the amount of CD95L RNA and the level of upregulation alone may  
677 not be enough to induce DISE, it could result from the combined expression of multiple RNAs  
678 that when generated kill cells by DISE. We view CD95L as just one of many RNAs that have  
679 this activity.

680 3) Are there other genes in the human genome containing toxic seed sequences? We recently  
681 identified other genes in the genome that contain DISE inducing shRNAs (Patel & Peter, 2017).  
682 It is therefore possible that when cells are subjected to genotoxic or oncogenic stress that they  
683 generate numerous small RNAs that can be taken up by the RISC and in combination execute  
684 DISE. Hence, our analysis of CD95/CD95L will likely be applicable to other genes.

685

### 686 **A model for why DISE preferentially kills cancer cells**

687 We interpret the hypersensitivity of both Drosha<sup>-/-</sup> and Dicer<sup>-/-</sup> cells to DISE in the following

688 way: Most of the small RNAs in the cells that are loaded into the RISC are miRNAs. Using  
689 AGO pull-down experiments we determined 98.4% of AGO associated RNAs in HCT116 cells  
690 to be miRNAs (99.3% in HeyA8 cells, data not shown). It was recently reported that *Drosha*<sup>-/-</sup>  
691 cells showed a reduction of miRNA content from roughly 70-80% to 5-6%, and *Dicer*<sup>-/-</sup> cells  
692 showed a reduction down to 14-21% (Y. K. Kim et al., 2016). Since neither *Drosha*<sup>-/-</sup> nor *Dicer*<sup>-/-</sup>  
693 cells express reduced AGO2 protein levels (see subset **Figure 3E**), it is reasonable to assume that  
694 their RISC can take up many more of the toxic DISE inducing RNAs than the RISC in wt cells  
695 explaining the super toxicity of both DISE inducing si/shRNAs and CD95L mRNAs in these  
696 cells.

697 We previously showed expression of either shL3 and shR6 induced DISE in immortalized  
698 normal ovarian fibroblasts much more efficiently than in matching nonimmortalized cells (Hadji  
699 et al., 2014), suggesting that this form of cell death preferentially affects transformed cells. Our  
700 data now provide an interesting model to explain the higher sensitivity of cancer cells to DISE  
701 when compared to normal cells. It is well documented that cancer cells in general have global  
702 downregulation of miRNAs when compared to normal tissues (Lu et al., 2005). This might free  
703 up the RISC for DISE inducing RNAs and would imply that miRNAs may protect normal cells  
704 from DISE.

705 Overall our data allow us to predict that any small RNA with DISE inducing RNAi activity  
706 that does not require Dicer processing can kill cancer cells regardless of Dicer or *Drosha* status.  
707 In fact, in an accompanying manuscript we demonstrate that DISE can be triggered *in vivo* to  
708 treat ovarian cancer in mouse xenografts by delivering CD95L-derived siRNAs using  
709 nanoparticles (Murmann et al., 2017). No toxicity was observed in the treated mice. These data  
710 suggest that it might be possible to develop a novel form of cancer therapy based on the DISE  
711 OTE mechanism.

712

## 713 **Materials and methods**

### 714 **Key Resource Table**

| <b>Reagent type (species) or resource</b> | <b>Designation</b> | <b>Source or reference</b> | <b>Identifiers</b> | <b>Additional information</b> |
|-------------------------------------------|--------------------|----------------------------|--------------------|-------------------------------|
| Gene (Homo sapiens)                       | CD95L              | NA                         | NM_000639          |                               |

|                          |                     |                               |                                                                          |                                                                                                                                                                                                            |
|--------------------------|---------------------|-------------------------------|--------------------------------------------------------------------------|------------------------------------------------------------------------------------------------------------------------------------------------------------------------------------------------------------|
| Gene (H. sapiens)        | CD95                | NA                            | NM_000043                                                                |                                                                                                                                                                                                            |
| Cell line (Homo sapiens) | NB7                 | PMID: 10802708                | BRENDA Tissue and Enzyme Source<br>Ontology: BTO_0003439; RRID:CVCL_8824 | Human neuroblastoma derived from autonomic ganglia; carries a deletion in both alleles of CASP8                                                                                                            |
| Cell line (H. sapiens)   | HeyA8               | PMID: 4016745; PMID: 25984343 | RRID: CVCL_8878; RRID:CVCL_8878                                          | Human high grade ovarian serous adenocarcinoma; derived from parent Hey cells (RRID: CVCL_0297)                                                                                                            |
| Cell line (H. sapiens)   | HeyA8 $\Delta$ shL3 | this paper                    | NA                                                                       | Pool of three HeyA8 cell clones with homozygous 41 nucleotide deletion of the shL3 target site (chr1:172,665,726-172,655,766; Human Dec. 2013 GRCh38/hg38 assembly) produced using CRISPR/Cas9 technology. |
| Cell line (H. sapiens)   | HeyA8 $\Delta$ siL3 | this paper                    | NA                                                                       | Pool of three HeyA8 cell clones with homozygous 64 nucleotide deletion of the siL3 target site (chr1:172,669,178-172,659,241; Human Dec. 2013 GRCh38/hg38 assembly) produced using CRISPR/Cas9 technology. |



|                        |                                          |            |    |                                                                                                                                                                                                                                                                                                                  |
|------------------------|------------------------------------------|------------|----|------------------------------------------------------------------------------------------------------------------------------------------------------------------------------------------------------------------------------------------------------------------------------------------------------------------|
| Cell line (H. sapiens) | HeyA8 $\Delta$ shR6; shR6 k.o. clone #11 | this paper | NA | HeyA8 cell clone #11 with homozygous 227 nucleotide deletion of the shR6 target site (chr10:89,008,920-89,009,146; Human Dec. 2013 GRCh38/hg38 assembly) produced using CRISPR/Cas9 technology; verified homozygous CD95 protein knockout                                                                        |
| Cell line (H. sapiens) | HeyA8 shR6 k.o. clone #1                 | this paper | NA | HeyA8 cell clone #1 with a small deletion and the 227 nucleotide deletion of the shR6 target site and an insertion of the pMJ920 plasmid fragment in CD95 produced using CRISPR/Cas9 technology; verified homozygous CD95 protein knockout                                                                       |
| Cell line (H. sapiens) | HeyA8 shR6 k.o. clone #2                 | this paper | NA | HeyA8 cell clone #2 with a 227 nucleotide deletion of the shR6 target site (chr10:89,008,920-89,009,146; Human Dec. 2013 GRCh38/hg38 assembly) in one allele and an insertion of the pSCB plasmid fragment in the other in CD95 produced using CRISPR/Cas9 technology; verified homozygous CD95 protein knockout |

|                        |                                                         |                                                               |                                                        |                                                                                                                                                                                                                                   |
|------------------------|---------------------------------------------------------|---------------------------------------------------------------|--------------------------------------------------------|-----------------------------------------------------------------------------------------------------------------------------------------------------------------------------------------------------------------------------------|
| Cell line (H. sapiens) | MCF-7                                                   | ATCC                                                          | ATCC: HTB-22;<br>RRID:CVCL_0031                        | Human adenocarcinoma of the mammary gland, breast; derived from metastatic site: pleural effusion                                                                                                                                 |
| Cell line (H. sapiens) | HCT116                                                  | Korean Collection for Type Cultures (KCTC)                    | KCTC: cat#HC19023;<br>ATCC: CCL_247;<br>RRID:CVCL_0291 | Human colorectal carcinoma                                                                                                                                                                                                        |
| Cell line (H. sapiens) | Drosha <sup>-/-</sup> ; Drosha <sup>-/-</sup> clone #40 | Korean Collection for Type Cultures (KCTC);<br>PMID: 26976605 | KCTC: cat#HC19020                                      | HCT116 clone #40 with homozygous protein knockout of Drosha; knockout achieved using CRISPR/Cas9 which resulted in a single nucleotide insertion in one allele and a 26 nucleotide deletion in the other                          |
| Cell line (H. sapiens) | Dicer <sup>-/-</sup> ; Dicer <sup>-/-</sup> clone #43   | Korean Collection for Type Cultures (KCTC);<br>PMID: 26976606 | KCTC: cat#HC19023                                      | HCT116 clone #43 with homozygous protein knockout of Dicer; knockout achieved using CRISPR/Cas9 which resulted in a three nucleotide insertion and 14 nucleotide deletion in one allele and a 35 nucleotide deletion in the other |
| Cell line (H. sapiens) | Dicer <sup>-/-</sup> ; Dicer <sup>-/-</sup> clone #45   | Korean Collection for Type Cultures (KCTC);<br>PMID: 26976607 | KCTC: cat#HC19024                                      | HCT116 clone #45 with homozygous protein knockout of Dicer; knockout achieved using CRISPR/Cas9 which resulted in a 53 nucleotide deletion in one allele and a 28 nucleotide deletion in the other                                |

|                        |                                                  |                |                                               |                                                                                                                                                                                                           |
|------------------------|--------------------------------------------------|----------------|-----------------------------------------------|-----------------------------------------------------------------------------------------------------------------------------------------------------------------------------------------------------------|
| Cell line (H. sapiens) | 293T                                             | ATCC           | ATCC: CRL-3216;<br>RRID:CVCL_0063             | Derived from HEK293 cells (ATCC: CRL-1573); express large T antigen; used for packaging viruses                                                                                                           |
| Cell line (H. sapiens) | 293T $\Delta$ shL3                               | this paper     | NA                                            | Pool of three 293T cell clones with homozygous 41 nucleotide deletion of the shL3 target site (chr1:172,665,726-172,655,766; Human Dec. 2013 GRCh38/hg38 assembly) produced using CRISPR/Cas9 technology. |
| Cell line (H. sapiens) | Phoenix-AMPHO                                    | ATCC           | ATCC: CRL-3213;<br>RRID:CVCL_H716             | Second generation retrovirus producer cell line                                                                                                                                                           |
| Antibody               | anti- $\beta$ -actin antibody (mouse monoclonal) | Santa Cruz     | Santa Cruz: cat#sc-47778;<br>RRID:AB_626632   | 1:2000; for western blot; primary Ab                                                                                                                                                                      |
| Antibody               | anti-human CD95L (Mouse IgG1 monoclonal)         | BD Biosciences | BD Biosciences: cat#556387;<br>RRID:AB_396402 | 1:500; for western blot; primary Ab                                                                                                                                                                       |
| Antibody               | anti-human CD95 (rabbit polyclonal)              | Santa Cruz     | Santa Cruz: cat#sc-715;<br>RRID:AB_2100386    | 1:1000; for western blot; primary Ab                                                                                                                                                                      |
| Antibody               | anti-human AGO2 (rabbit monoclonal)              | Abcam          | Abcam: cat#AB186733;<br>RRID:AB_2713978       | 1:2000; for western blot; primary Ab                                                                                                                                                                      |
| Antibody               | anti-human Drosha (rabbit monoclonal)            | Cell Signaling | Cell Signaling: cat#3364;<br>RRID:AB_10828827 | 1:1000; for western blot; primary Ab                                                                                                                                                                      |
| Antibody               | anti-human Dicer (rabbit polyclonal)             | Cell Signaling | Cell Signaling: cat#3363;<br>RRID:AB_2093073  | 1:1000; for western blot; primary Ab                                                                                                                                                                      |

|                             |                                           |                  |                                                   |                                                                        |
|-----------------------------|-------------------------------------------|------------------|---------------------------------------------------|------------------------------------------------------------------------|
| Antibody                    | Goat anti-rabbit, IgG-HRP                 | Southern Biotech | Southern Biotech: cat#SB-4030-05; RRID:AB_2687483 | 1:5000; for western blot; secondary Ab                                 |
| Antibody                    | Goat anti-rabbit, IgG-HRP                 | Cell Signaling   | Cell Signaling: cat#7074; RRID:AB_2099233         | 1:2000; for western blot; secondary Ab                                 |
| Antibody                    | Goat anti-mouse; IgG1-HRP                 | Southern Biotech | Southern BioTech: cat#1070-05; RRID:AB_2650509    | 1:5000; for western blot; secondary Ab                                 |
| Isotype control             | FITC-mouse IgG1, $\kappa$ isotype control | BD Biosciences   | BD Biosciences: cat#551954; RRID:AB_394297        | 4uL used for $1 \times 10^6$ cells; for flow cytometry                 |
| Antibody                    | FITC-mouse anti-Human CD95                | BD Biosciences   | BD Biosciences: cat#556640; RRID:AB_396506        | 4uL used for $1 \times 10^6$ cells; for flow cytometry                 |
| Recombinant protein reagent | sCD95L (S2)                               | PMID: 14504390   | NA                                                | Soluble form of human CD95L (amino acids 137–281); recombinant protein |
| Recombinant protein reagent | LzCD95L                                   | PMID: 14504390   | NA                                                | Leucine zipper tagged CD95L; recombinant protein                       |
| Chemical compound           | propidium iodide                          | Sigma-Aldrich    | Sigma-Aldrich: cat#P4864                          | Used for subG1 flow cytometry analysis                                 |
| Chemical compound           | puromycin                                 | Sigma-Aldrich    | Sigma-Aldrich: cat#P9620                          | Used for selection of cells expressing puromycin resistance cassettes  |
| Chemical compound           | G418                                      | Affymetrix       | Affymetrix: cat#11379                             | Used for selection of cells expressing G418 resistance cassette        |
| Chemical compound           | zVAD-fmk                                  | Sigma-Aldrich    | Sigma-Aldrich: cat#V116                           | Used at 20uM; pan caspase inhibitor                                    |

|                         |                                            |               |                         |                                                                                                                                                                                                                                 |
|-------------------------|--------------------------------------------|---------------|-------------------------|---------------------------------------------------------------------------------------------------------------------------------------------------------------------------------------------------------------------------------|
| Chemical compound       | doxycycline; DOX                           | Sigma-Aldrich | Sigma-Aldrich: cat#9891 | Used at 100ng/mL; used to induce expression from doxycycline-inducible promoters                                                                                                                                                |
| Recombinant DNA reagent | venus-CD95L sensor (plasmid)               | this paper    | NA                      | Modified CD510B-1 lentiviral vector (PMID: 25366259) was used as backbone; vector expresses a venus-human CD95L conjugate mRNA that can be used to monitor RNAi activity of si/shRNAs targeting CD95L using venus fluorescence. |
| Recombinant DNA reagent | venus-CD95 sensor (plasmid)                | this paper    | NA                      | Modified CD510B-1 lentiviral vector (PMID: 25366259) was used as backbone; vector expresses a venus-human CD95 conjugate mRNA that can be used to monitor RNAi activity of si/shRNAs targeting CD95 using venus fluorescence.   |
| Recombinant DNA reagent | pLenti-GIII-CMV-RFP-2A-Puro vector; pLenti | ABM Inc       | NA                      | pLenti control empty lentiviral vector; carries an RFP-2a-puromycin resistance cassette                                                                                                                                         |
| Recombinant DNA reagent | pLNCX2                                     | Clontech      | Clontech: cat#631503    | pLNCX2 control empty retroviral vector; carries a neomycin resistance cassette                                                                                                                                                  |

|                         |                    |                   |    |                                                                                                                                                                                                                                                                                   |
|-------------------------|--------------------|-------------------|----|-----------------------------------------------------------------------------------------------------------------------------------------------------------------------------------------------------------------------------------------------------------------------------------|
| Recombinant DNA reagent | pTIP               | PMID:<br>24656822 | NA | Lentivirus used for doxycycline-induced expression of shRNAs; contains puromycin resistance cassette; modified from the original backbone which contained a GFP cassette instead of a puromycin cassette (PMID: 17311008); original backbone from the Rossi lab.                  |
| Recombinant DNA reagent | pLenti-CD95L-WT    | this paper        | NA | pLenti-GIII-CMV-RFP-2A-Puro vector that expresses human wild type CD95L cDNA (NM_000639.2); used to express wt human CD95L upon infection with lentiviral particles                                                                                                               |
| Recombinant DNA reagent | pLenti-CD95L-L1MUT | this paper        | NA | pLenti-GIII-CMV-RFP-2A-Puro vector that expresses human CD95L cDNA (NM_000639.2) with 8 silent mutations overlapping the shL1 target site (GCATCATCTTTGGA GAAGCAA -> GCCTCGTCCCTAGA AAAACAG); used to express shL1-resistant human CD95L upon infection with lentiviral particles |

|                         |                    |            |    |                                                                                                                                                                                                                                                                                     |
|-------------------------|--------------------|------------|----|-------------------------------------------------------------------------------------------------------------------------------------------------------------------------------------------------------------------------------------------------------------------------------------|
| Recombinant DNA reagent | pLenti-CD95L-L3MUT | this paper | NA | pLenti-GIII-CMV-RFP-2A-Puro vector that expresses human CD95L cDNA (NM_000639.2) with 8 silent mutations overlapping the shL3 target site (ACTGGGCTGTA CTT TGTATAT -> ACCGGATTATAT TTC GTGTAC); used to express shL3-resistant human CD95L upon infection with lentiviral particles |
| Recombinant DNA reagent | pLNCX2-CD95-WT     | this paper | NA | pLNCX2 vector that expresses human CD95 cDNA (BC012479.1); used to express wild type CD95 upon infection with lentiviral particles                                                                                                                                                  |
| Recombinant DNA reagent | pLNCX2-CD95-R6MUT  | this paper | NA | pLNCX2 vector that expresses mutant human CD95 cDNA (BC012479.1) which contains 8 silent mutations overlapping the shR6 site (GTGTCGCTGTAAAC CAAACTT -> ATGTCGCTGCAAGC CCAATTT); used to express shR6-resistant CD95 upon infection with lentiviral particles                       |

|                                    |                                              |                               |                                          |                                                                                                                                                                                                                                                                                                                                                                                    |
|------------------------------------|----------------------------------------------|-------------------------------|------------------------------------------|------------------------------------------------------------------------------------------------------------------------------------------------------------------------------------------------------------------------------------------------------------------------------------------------------------------------------------------------------------------------------------|
| Transfected construct              | gRNA scaffold                                | PMID:<br>23287722             | IDT: synthesized as gene block           | 455 nucleotide CRISPR/Cas9 gRNA scaffold synthesized as a gene block; contains promoter, gRNA scaffold, target sequence, and termination sequence; scaffold transcribes gRNAs that target Cas9 endonuclease to cut at target sites; target sequences consist of 19 nucleotides that are complementary to the target site of choice; co-transfected with Cas9 to catalyze cleavage. |
| Transfected construct              | pMJ920 Cas9 plasmid                          | Addgene;<br>PMID:<br>23386978 | Addgene:<br>cat#42234                    | Plasmid that expresses a human codon-optimized Cas9 tagged with GFP and HA; used to express Cas9 for CRISPR-mediated deletions.                                                                                                                                                                                                                                                    |
| Chemical compound                  | Lipofectamine 2000                           | ThermoFisher Scientific       | ThermoFisher Scientific:<br>cat#11668019 | Transfection reagent                                                                                                                                                                                                                                                                                                                                                               |
| Chemical compound                  | Lipofectamine RNAiMAX                        | ThermoFisher Scientific       | ThermoFisher Scientific:<br>cat#13778150 | Transfection reagent; used for transfection of small RNAs such as siRNAs                                                                                                                                                                                                                                                                                                           |
| Commercial assay or kit            | StrataClone Blunt PCR Cloning Kit            | Agilent Technologies          | Agilent Technologies:<br>cat#240207      | Used to blunt-end clone the gRNA scaffolds into the pSC-B plasmid                                                                                                                                                                                                                                                                                                                  |
| Commercial assay or kit            | High-Capacity cDNA reverse transcription kit | Applied Biosystems            | 4368814                                  |                                                                                                                                                                                                                                                                                                                                                                                    |
| Array cards preloaded with primers | 384-well TLDA cards                          | Applied Biosystems            | 43422489                                 |                                                                                                                                                                                                                                                                                                                                                                                    |



|                        |                                   |                         |                       |                                                                                                                |
|------------------------|-----------------------------------|-------------------------|-----------------------|----------------------------------------------------------------------------------------------------------------|
| Genetic reagent        | Taqman Gene expression master mix | ThermoFisher Scientific | 4369016               |                                                                                                                |
| Sequence-based reagent | shL3 flanking Fr primer           | IDT                     | IDT: custom DNA oligo | Fr primer that flanks shL3 site; used to detect 41 nt shL3 deletion; 5'-TCTGGAATGGGAAGACACCT-3'                |
| Sequence-based reagent | shL3 flanking Rev primer          | IDT                     | IDT: custom DNA oligo | Rev primer that flanks shL3 site; used to detect 41 nt shL3 deletion; 5'-CCTCCATCATCACCA GATCC-3'              |
| Sequence-based reagent | shL3 internal Rev primer          | IDT                     | IDT: custom DNA oligo | Rev primer that overlaps with the shL3 site; used to detect 41 nt shL3 deletion; 5'-ATATACAAAGTACAG CCCAGT-3'  |
| Sequence-based reagent | shR6 flanking Fr primer           | IDT                     | IDT: custom DNA oligo | Fr primer that flanks shR6 site; used to detect 227 nt shR6 deletion; 5'-GGTGTCATGCTGTG ACTGTTG-3'             |
| Sequence-based reagent | shR6 flanking Rev primer          | IDT                     | IDT: custom DNA oligo | Rev primer that flanks shR6 site; used to detect 227 nt shR6 deletion; 5'-TTTAGCTTAAGTGGC CAGCAA-3'            |
| Sequence-based reagent | shR6 internal Rev primer          | IDT                     | IDT: custom DNA oligo | Rev primer that overlaps with the shR6 site; used to detect 227 nt shR6 deletion; 5'-AAGTTGGTTTACATC TGACAC-3' |

|                        |                          |                |                           |                                                                                                                 |
|------------------------|--------------------------|----------------|---------------------------|-----------------------------------------------------------------------------------------------------------------|
| Sequence-based reagent | siL3 flanking Fr primer  | IDT            | IDT: custom DNA oligo     | Fr primer that flanks siL3 site; used to detect 64 nt siL3 deletion; 5'-CTTGAGCAGTCAGC AACAGG-3'                |
| Sequence-based reagent | siL3 flanking Rev primer | IDT            | IDT: custom DNA oligo     | Rev primer that flanks siL3 site; used to detect 64 nt siL3 deletion; 5'-CAGAGGTTGGACAG GGAAGA-3'               |
| Sequence-based reagent | siL3 internal Rev primer | IDT            | IDT: custom DNA oligo     | Rev primer that is internal to the siL3 site; used to detect 64 nt siL3 deletion; 5'-ATATGGGTAATTGAA GGGCTG-3'. |
| Sequence-based reagent | siScr                    | IDT; Dharmacon | Dharmacon #D-001810-02-05 | sense: UGGUUUACAUGUUG UGUGA                                                                                     |
| Sequence-based reagent | siL1; siL2; siL3; siL4   | Dharmacon      | L-011130-00-0005          | sense: UACCAGUGCUGAUC AUUUA                                                                                     |
| Sequence-based reagent | siL1                     | IDT            | customer synthesis        | sense: UACCAGUGCUGAUC AUUUA                                                                                     |
| Sequence-based reagent | siL2                     | IDT            | customer synthesis        | sense: CAACGUAUCUGAGC UCUCU                                                                                     |
| Sequence-based reagent | siL3                     | IDT            | customer synthesis        | sense: GCCCUUCAUUACC CAUUA                                                                                      |
| Sequence-based reagent | siL3MUT                  | IDT            | IDT #51-01-14-03          | sense: GGACUUCAACUAGA CAUCU                                                                                     |
| Sequence-based reagent | siL4                     | IDT            | customer synthesis        | sense: GGAAAGUGGCCCAU UUAAC                                                                                     |

|                        |                                  |           |                    |                                                                                     |
|------------------------|----------------------------------|-----------|--------------------|-------------------------------------------------------------------------------------|
| Sequence-based reagent | shL3=>siL3                       | IDT       | customer synthesis | sense:<br>GACUGGGCUGUACU<br>UUGUAdTdA<br>antisense:<br>UACAAAGUACAGCC<br>CAGUUdTdT  |
| Sequence-based reagent | shR6=>siR6                       | IDT       | customer synthesis | sense:<br>GGGUGCAGAUGUAA<br>ACCAAdCdT;<br>antisense:<br>UUUGGUUUACAUCU<br>GCACUdTdT |
| Sequence-based reagent | Dsi-13.2                         | IDT       | customer synthesis | sense:<br>AUCUU<br>ACCAGUGCUGAUCA<br>UUUAdTdA                                       |
| Sequence-based reagent | Dsi-13.3                         | IDT       | customer synthesis | sense:<br>AAAGUAUACUCCG<br>GGGUCAAUCdTdT                                            |
| Sequence-based reagent | Dsi-13.9                         | IDT       | customer synthesis | sense:<br>CUUCCGGGGUCAAU<br>CUUGCAACAdAdC                                           |
| Sequence-based reagent | Dsi-13.x                         | IDT       | customer synthesis | sense:<br>CAGGACUGAGAAGA<br>AGUAAAACCdGdT                                           |
| Sequence-based reagent | DsiL3                            | IDT       | customer synthesis | sense:<br>CAGCCCUUCAUUA<br>CCCAUAUCCdCdC                                            |
| Sequence-based reagent | siScr pool                       | Dharmacon | D-001810-10        |                                                                                     |
| Sequence-based reagent | smartpool siRNA targeting NUCKS1 | Dharmacon | L-014208-02        |                                                                                     |
| Sequence-based reagent | smartpool siRNA targeting CAPZA1 | Dharmacon | L-012212-00        |                                                                                     |
| Sequence-based reagent | smartpool siRNA targeting CCT3   | Dharmacon | L-018339-00        |                                                                                     |

|                                |                                    |                         |               |  |
|--------------------------------|------------------------------------|-------------------------|---------------|--|
| Sequence-based reagent         | smartpool siRNA targeting FSTL1    | Dharmacon               | L-013615-00   |  |
| Sequence-based reagent         | smartpool siRNA targeting FUBP1    | Dharmacon               | L-011548-00   |  |
| Sequence-based reagent         | smartpool siRNA targeting GNB1     | Dharmacon               | L-017242-00   |  |
| Sequence-based reagent         | smartpool siRNA targeting NAA50    | Dharmacon               | L-014597-01   |  |
| Sequence-based reagent         | smartpool siRNA targeting PRELID3B | Dharmacon               | L-020893-01   |  |
| Sequence-based reagent         | smartpool siRNA targeting SNRPE    | Dharmacon               | L-019719-02   |  |
| Sequence-based reagent         | smartpool siRNA targeting TFRC     | Dharmacon               | L-003941-00   |  |
| Sequence-based reagent         | smartpool siRNA targeting HIST1H1C | Dharmacon               | L-006630-00   |  |
| Sequence based reagent (human) | GAPDH primer                       | Thermofisher Scientific | Hs00266705_g1 |  |

|                                |                                  |                         |                                 |                                                                                                                                                       |
|--------------------------------|----------------------------------|-------------------------|---------------------------------|-------------------------------------------------------------------------------------------------------------------------------------------------------|
| Sequence based reagent (human) | CD95 primer                      | Thermofisher Scientific | custom probe                    | Fr primer:<br>GGCTAACCCCACTC<br>TATGAATCAAT Rev<br>primer:<br>GGCCTGCCTGTTCA<br>GTA<br>ACT<br>Probe:<br>CCTTTTGCTGAAATA<br>TC                         |
| Sequence based reagent (human) | CD95 primer (Fig 5-supplement 3) | Thermofisher Scientific | Hs00163653_m1                   |                                                                                                                                                       |
| Sequence based reagent (human) | CD95L primers                    | Thermofisher Scientific | Hs00181226_g1;<br>Hs00181225_m1 |                                                                                                                                                       |
| Sequence based reagent (human) | shL3 target site in CD95L        | Thermofisher Scientific | custom probe                    | Fr primer:<br><i>GGTGGCCTTGTGAT<br/>CAATGAAA</i><br>Rev primer:<br><i>GCAAGATTGACCCC<br/>GGAAGTATA</i><br>Probe:<br><i>CTGGGCTGTACTTTG<br/>TATATT</i> |
| Sequence based reagent (human) | downstream of shL3 site          | Thermofisher Scientific | custom probe                    | Fr primer:<br><i>CCCCAGGATCTGGT<br/>GATGATG</i> Rev<br>primer:<br><i>ACTGCCCCCAGGTA<br/>GCT</i> Probe:<br><i>CCCACATCTGCCCA<br/>GTAGT</i>             |
| Sequence based reagent (human) | GAPDH primer (TLDA card)         | Thermofisher Scientific | Hs99999905_m1                   |                                                                                                                                                       |
| Sequence based reagent (human) | ATP13A3 primer (TLDA card)       | Thermofisher Scientific | Hs00225950_m1                   |                                                                                                                                                       |
| Sequence based reagent         | CAPZA1 primer (TLDA card)        | Thermofisher Scientific | Hs00855355_g1                   |                                                                                                                                                       |

|                                |                             |                         |               |                 |
|--------------------------------|-----------------------------|-------------------------|---------------|-----------------|
| (human)                        |                             |                         |               |                 |
| Sequence based reagent (human) | CCT3 primer (TLDA card)     | Thermofisher Scientific | Hs00195623_m1 |                 |
| Sequence based reagent (human) | FSTL1 primer (TLDA card)    | Thermofisher Scientific | Hs00907496_m1 |                 |
| Sequence based reagent (human) | FUPB1 primer (TLDA card)    | Thermofisher Scientific | Hs00900762_m1 |                 |
| Sequence based reagent (human) | GNB1 primer (TLDA card)     | Thermofisher Scientific | Hs00929799_m1 |                 |
| Sequence based reagent (human) | HIST1H1C primer (TLDA card) | Thermofisher Scientific | Hs00271185_s1 |                 |
| Sequence based reagent (human) | NAA50 primer (TLDA card)    | Thermofisher Scientific | Hs00363889_m1 |                 |
| Sequence based reagent (human) | NUCKS1 primer (TLDA card)   | Thermofisher Scientific | Hs01068059_g1 |                 |
| Sequence based reagent (human) | PRELID3B primer (TLDA card) | Thermofisher Scientific | Hs00429845_m1 |                 |
| Sequence based reagent (human) | SNRPE primer (TLDA card)    | Thermofisher Scientific | Hs01635040_s1 |                 |
| Sequence based reagent (human) | TFRC primer (TLDA card)     | Thermofisher Scientific | Hs00951083_m1 |                 |
| Software                       | Stata 14                    | Stata                   |               | RRID:SCR_012763 |
| Software                       | Rstudio (R3.3.1)            | Rstudio                 |               | RRID:SCR_000432 |

|                                |       |       |                |                                                    |
|--------------------------------|-------|-------|----------------|----------------------------------------------------|
| sequence based reagent         | shScr | Sigma | SHC002V        | Non-targeting shRNA control transduction particles |
| sequence based reagent (human) | shL1  | Sigma | TRCN0000058998 | GCATCATCTTTGGAG AAGCAA                             |
| sequence based reagent (human) | shL2  | Sigma | TRCN0000058999 | CCCATTAAACAGGCA AGTCCA                             |
| sequence based reagent (human) | shL3  | Sigma | TRCN0000059000 | ACTGGGCTGTACTTT GTATAT                             |
| sequence based reagent (human) | shL4  | Sigma | TRCN0000059001 | GCAGTGTTCAATCTT ACCAGT                             |
| sequence based reagent (human) | shL5  | Sigma | TRCN0000059002 | CTGTGTCTCCTTG TG ATGTTT                            |
| sequence based reagent (human) | shL6  | Sigma | TRCN0000372231 | TGAGCTCTCTCTGGT CAATTT                             |
| sequence based reagent (human) | shL2' | Sigma | TRCN0000372232 | TAGCTCCTCAACTCA CCTAAT                             |
| sequence based reagent (human) | shL5' | Sigma | TRCN0000372175 | GACTAGAGGCTTGC ATAATAA                             |
| sequence based reagent (human) | shR2  | Sigma | TRCN0000218492 | CTATCATCCTCAAGG ACATTA                             |

|                                |        |       |                    |                            |
|--------------------------------|--------|-------|--------------------|----------------------------|
| sequence based reagent (human) | shR5   | Sigma | TRCN00000386<br>95 | GTTGCTAGATTATCG<br>TCCAAA  |
| sequence based reagent (human) | shR6   | Sigma | TRCN00000386<br>96 | GTGCAGATGTAAAC<br>CAAACCTT |
| sequence based reagent (human) | shR7   | Sigma | TRCN00000386<br>97 | CCTGAAACAGTGGC<br>AATAAAT  |
| sequence based reagent (human) | shR8   | Sigma | TRCN00000386<br>98 | GCAAAGAGGAAGGA<br>TCCAGAT  |
| sequence based reagent (human) | shR27' | Sigma | TRCN00002656<br>27 | TTTTACTGGGTACAT<br>TTTATC  |
| sequence based reagent (human) | shR7'  | Sigma | TRCN00002554<br>07 | TTAAATTATAATGTTT<br>GACTA  |
| sequence based reagent (human) | shR8'  | Sigma | TRCN00002554<br>08 | ATATCTTTGAAAGTT<br>TGTATT  |
| sequence based reagent (human) | shR6'  | Sigma | TRCN00002554<br>06 | CCCTTGTGTTTGGAA<br>TTATAA  |

715

716

717 **Reagents and antibodies**



718 Primary antibodies for Western blot: anti- $\beta$ -actin antibody (Santa Cruz #sc-47778,  
719 RRID:AB\_626632), anti-human CD95L (BD Biosciences #556387, RRID:AB\_396402), and  
720 anti-human CD95 (Santa Cruz #sc-715, RRID:AB\_2100386), anti-human AGO2 (Abcam  
721 #AB186733, RRID:AB\_2713978), anti-human Drosha (Cell Signaling #3364,  
722 RRID:AB\_10828827), and anti-Dicer (Cell Signaling #3363, RRID:AB\_2093073). Secondary  
723 antibodies for Western blot: Goat anti-rabbit; IgG-HRP (Southern Biotech #SB-4030-05,  
724 RRID:AB\_2687483 and Cell Signaling #7074, RRID:AB\_2099233) and Goat anti-mouse; IgG1-  
725 HRP; (Southern BioTech #1070-05, RRID:AB\_2650509). Conjugated antibody isotype control  
726 for CD95 surface staining were FITC-mouse anti-human CD95 (BD Biosciences #556640,  
727 RRID:AB\_396506) and FITC-mouse IgG1,  $\kappa$  isotype control (BD Biosciences #551954,  
728 RRID:AB\_394297). Recombinant soluble S2 CD95L and leucine-zipper tagged (Lz)CD95L  
729 were described before (Algeciras-Schimmich et al., 2003). Reagents used: propidium iodide  
730 (Sigma-Aldrich #P4864), puromycin (Sigma-Aldrich #P9620), G418 (Affymetrix #11379),  
731 zVAD-fmk (Sigma-Aldrich #V116, used at 20  $\mu$ M), doxycycline (Dox) (Sigma-Aldrich #9891),  
732 Lipofectamine 2000 (ThermoFisher Scientific #11668027), and Lipofectamine RNAiMAX  
733 (ThermoFisher Scientific #13778150).

734

### 735 **Cell lines**

736 The ovarian cancer cell line HeyA8 (RRID:CVCL\_8878), the neuroblastoma cell line NB7  
737 (RRID:CVCL\_8824), and the breast cancer cell line MCF-7 (RRID:CVCL\_0031) were grown in  
738 RPMI 1640 medium (Cellgro #10-040-CM), 10% heat-inactivated FBS (Sigma-Aldrich), 1% L-  
739 glutamine (Mediatech Inc), and 1% penicillin/streptomycin (Mediatech Inc). The human  
740 embryonic kidney cell line 293T (RRID:CVCL\_0063) and Phoenix AMPHO  
741 (RRID:CVCL\_H716) cells were cultured in DMEM (Cellgro #10-013-CM), 10% heat-  
742 inactivated FBS, 1% L-Glutamine, and 1% penicillin/streptomycin.

743 HCT116 Drosha<sup>-/-</sup> and Dicer<sup>-/-</sup> cells were generated by Narry Kim (Y. K. Kim et al., 2016).  
744 HCT116 parental (cat#HC19023, RRID:CVCL\_0291), a Drosha<sup>-/-</sup> clone (clone #40,  
745 cat#HC19020) and two Dicer<sup>-/-</sup> clones (clone #43, cat#HC19023 and clone #45, cat#HC19024)  
746 were purchased from Korean Collection for Type Cultures (KCTC). All HCT116 cells were  
747 cultured in McCoy's medium (ATCC, cat#30-2007), 10% heat-inactivated FBS, 1% L-  
748 Glutamine, and 1% penicillin/ streptomycin. All cell lines were authenticated using STR  
749 profiling and tested monthly for mycoplasma using Plasmotest (Invitrogen).

750 All lentiviruses were generated in 293T cells using pCMV-dR8.9 and pMD.G packaging  
751 plasmids. Retroviruses were generated in Phoenix AMPHO cells using the VSVg packaging  
752 plasmid.

753 NB7 cells overexpressing wild type and mutant CD95L cDNAs used in *Figure 1C and D*  
754 were generated by infecting cells seeded at 50,000 to 100,000 cells per well on a 6-well plate  
755 with empty pLenti, pLenti-CD95L-WT, pLenti-CD95L-L1MUT, and pLenti-CD95L-L3MUT  
756 (described below) with 8 µg/ml polybrene. Selection was done with 3 µg/ml puromycin for at  
757 least 48 hours.

758 MCF-7 cells overexpressing CD95 cDNAs used in *Figure 1F* were generated by seeding  
759 cells at 50,000 per well in a 6-well plate followed by infection with pLNCX2-CD95 or pLNCX2-  
760 CD95R6MUT (described below) in the presence of 8 µg/ml polybrene. Selection was done with  
761 200 µg/ml G418 48 hours after infection for 2 weeks.

762 The HeyA8 cells used in *Figure 3D* carried a lentiviral Venus-siL3 sensor vector (Murmman  
763 et al., 2017) and were infected with NuLight Red lentivirus (Essen Bioscience #4476) with 8  
764 µg/ml polybrene and selected with 3 µg/ml puromycin and sorted for high Venus expression 48  
765 hours later. HeyA8 ΔshR6 clone #2 sensor cells used in *Figure 3A to 3C* were infected with  
766 lentiviruses generated from the Venus-CD95L sensor vector (described below) to over-express  
767 the Venus-CD95L chimeric transcript. Cells were sorted for high Venus expression 48 hours  
768 later. NB7 cells over-expressing either the Venus-CD95L sensor or the Venus-CD95 sensor  
769 (described below) used in *Figure 6 – figure supplement 1A* were similarly generated.

770

### 771 **Plasmids and constructs**

772 The Venus-CD95L ORF and Venus-CD95 ORF (full length) sensor vectors were created by sub-  
773 cloning the Venus-CD95L or the Venus-CD95 inserts (synthesized as a minigene by IDT with  
774 flanking XbaI RE site on the 5' end and EcoRI RE site at the 3' end in the pIDTblue vector),  
775 which are composed of the Venus ORF followed by either the CD95L ORF (accession number  
776 NM\_000639.2) or the CD95 ORF (accession number BC012479.1) as an artificial 3'UTR (both  
777 lacking the A in the start codon), respectively, into the modified CD510B vector (Ceppi et al.,  
778 2014) using XbaI and EcoRI. Ligation was done with T4 DNA ligase.

779 The pLNCX2-CD95R6MUT vector was synthesized by replacing a 403bp fragment of the  
780 CD95 ORF insert from the pLNCX2-CD95-WT vector (Hadji et al., 2014) with a corresponding  
781 403bp fragment that had 8 silent mutation substitutions at the shR6 site (5'-

782 *GTGTCGCTGTAAACCAA ACTT* -> 5'-*ATGTCGCTGCAAGCCCAATTT*-3') using BstXI  
783 (NEB #R0113) and BamHI (NEB #R3136) restriction enzymes (mutant insert was synthesized in  
784 a pIDTblue vector with 5' end BstXI site and 3' end BamHI RE site).

785 Dox-inducible vectors expressing shRNAs were constructed by subcloning an annealed  
786 double-stranded DNA insert containing the sequence encoding the shRNA hairpin (sense strand:  
787 5'-*TGGCTTTATATATCTCCCTATCAGTGATAGAGATCGNNNNNNNNNNNNNNNNNNNNNNNNNNNNNNNN*  
788 *CTCGAGnnnnnnnnnnnnnnnnnnnnnnnnnnnnnnTTTTTGTACCGAGCTCGGATCCACTAGTCCAGTGTGGG*  
789 *CATGCTGCGTTGACATTGATT*-3') into the pTIP-shR6 vector (Hadji et al., 2014). BsaBI (NEB  
790 #R0537) and SphI-HF (NEB #R3182) were used to digest both the pTIP-shR6 vector (to excise  
791 the shR6 insert) and the double-stranded shRNA DNA cassette insert followed by ligation with  
792 T4 DNA ligase. The template oligos were purchased from IDT. The poly-N represents the two  
793 21bp sequences that transcribe for the sense (*N*) and antisense (*n*) shRNA.

794 miR-30 based shRNAs were generated by The Gene Editing & Screening Core, at Memorial  
795 Sloan Kettering, NY, by converting the 21mers expressed in the pLKO and pTIP vectors into  
796 22mers followed by cloning into the Dox-inducible LT3REPIR vector as described (Dow et al.,  
797 2012). A vector expressing an shRNA against Renilla luciferase was used as control (Dow et al.,  
798 2012).

799

### 800 **CRISPR deletions**

801 We identified two gRNAs that target upstream and downstream of the site to be deleted. These  
802 gRNAs were expected to result in the deletion of a DNA piece just large enough to remove the  
803 target site. The CRISPR gRNA scaffold gene blocks were from IDT and consisted of the DNA

804 sequence 5'-*TGTACAAAAAGCAGGCTTTAAAGGAACCAATTCAGTCGACTGGATCCGGTA*  
805 *CCAAGGTCGGGCAGGAAGAGGGCCTATTTCCCATGATTCCTTCATATTTGCATATACGA*  
806 *TACAAGGCTGTTAGAGAGATAATTAGAATTAATTTGACTGTAAACACAAAGATATTAGTACA*  
807 *AAATACGTGACGTAGAAAGTAATAATTTCTTGGGTAGTTTGCAGTTTTAAATTTATGTTTTAA*  
808 *AATGGACTATCATATGCTTACCGTAACTTGAAAGTATTTTCGATTTCTTGGCTTTATATATCTT*  
809 *GTGGAAAGGACGAAACACCGNNNNNNNNNNNNNNNNNNNNNNNGTTTTAGAGCTAGAAATAGC*  
810 *AAGTTAAATAAGGCTAGTCCGTTATCAACTTGAAAAAGTGGCACCGAGTCGGTGCTTTTTT*  
811 *TCTAGACCCAGCTTTCTTGTACAAAGTTGGCATT*-3' (Mali et al., 2013); The poly-  
812 *NNNNNNNNNNNNNNNNNNNNNNNNNNNNNN* represents the 19nt target sequence. The two 19nt target  
813 sequences for excision of the shL3 site ( $\Delta$ 41 deletion) were 5'-*CCTTGATCAATGAAACT*-3'

814 (gRNA #1) and 5'-*GTTGTTGCAAGATTGACCC*-3' (gRNA #2). The two target sequences for  
815 the  $\Delta 227$  deletion of the shR6 site were 5'-*GCACTTGGTATTCTGGGGTC*-3' and 5'-  
816 *TGTTTGCTCATTTAAACAC*-3'. The two target sequences for  $\Delta 64$  deletion of the siL3 site were  
817 5'-*TAAAACCGTTTGCTGGGGC*-3' and 5'-*TATCCCAGATCTACTGGG*-3'. Target sequences  
818 were identified using the CRISPR gRNA algorithm found at <http://crispr.mit.edu/>; only gRNAs  
819 with scores over 50 were used. These 6 gene blocks were sub-cloned into the pSC-B-amp/kan  
820 plasmid using the StrataClone Blunt PCR Cloning kit (Agilent Technologies #240207).

821 The target sites of siL3, shL3, and shR6 were homozygously deleted from target cells by co-  
822 transfecting Cas9 plasmid with each corresponding pair of pSC-B-gRNA plasmids. Briefly,  
823 400,000 cells were seeded per well on a 6-well plate the day prior to transfection. Each well was  
824 transfected with 940 ng of Cas9-GFP plasmid (pMJ920) (Jinek et al., 2013) and 450 ng of each  
825 pSC-B-gRNA plasmid using Lipofectamine 2000. Media was replaced next day. One to two  
826 days later, cells were sorted for the top 50% population with the highest green fluorescence.  
827 Those cells were cultured for an additional week to let them recover. The cells were then sorted  
828 by FACS (BD FACSAria SORP system) directly into 96-well plates containing a 1:1 ratio of  
829 fresh media:conditioned media for single cell cloning. Approximately two to three weeks later,  
830 single cell clones were expanded and subjected to genotyping. PCR using both a primer pair that  
831 flanked the region to be deleted and another pair containing one flanking primer and one internal  
832 primer was used to screen clones for homozygous deletion. For detection of the  $\Delta 41$  deletion of  
833 the shL3 site, the flanking external primers were 5'-*TCTGGAATGGGAAGACACCT*-3' (Fr  
834 primer) and 5'-*CCTCCATCATCACCAGATCC*-3' (Rev primer), and the internal Rev primer was  
835 5'-*ATATACAAAGTACAGCCCAGT*-3'. For detection of the  $\Delta 227$  deletion of the shR6 site, the  
836 flanking external primers were 5'-*GGTGTCATGCTGTGACTGTTG*-3' (Fr primer) and 5'-  
837 *TTAGCTTAAGTGGCCAGCAA*-3' (Rev primer), and the internal Rev primer was 5'-  
838 *AAGTTGGTTTACATCTGCAC*-3'. For detection of the  $\Delta 64$  deletion of the siL3 site, the flanking  
839 external primers were 5'-*CTGAGCAGTCAGCAACAGG*-3' (Fr primer) and 5'-  
840 *CAGAGGTTGGACAGGGAAGA*-3' (Rev primer), and the internal Rev primer was 5'-  
841 *ATATGGGTAATTGAAGGGCTG*-3'. After screening the clones, Sanger sequencing was  
842 performed to confirm that the proper deletion had occurred. Three clones were pooled for each  
843 si/shRNA target site deletion except for HeyA8  $\Delta$ shR6 for which only clone #11 showed  
844 homozygous deletion of the shR6 site; clones #1 and 2 were not complete shR6 deletion mutants,

845 but frame-shift mutations did occur in each allele (as in clone #11) making them CD95  
846 knockout clones as depicted in **Figure 2 - figure supplement 1A and B**.

847

#### 848 **Knockdown with pLKO lentiviruses**

849 Cells were infected with the following pLKO.2 MISSION Lentiviral Transduction Particles  
850 (Sigma): pLKO.2-puro non-targeting (scramble) shRNA particles (#SHC002V), 8 non-  
851 overlapping shRNAs against human CD95L mRNA (accession number #NM\_000639),  
852 TRCN0000058998 (shL1: GCATCATCTTTGGAGAAGCAA), TRCN0000058999 (shL2:  
853 CCCATTTAACAGGCAAGTCCA), TRCN0000059000 (shL3:  
854 ACTGGGCTGTACTTTGTATAT), TRCN0000059001 (shL4:  
855 GCAGTGTCAATCTTACCAGT), TRCN0000059002 (shL5:  
856 CTGTGTCTCCTTGTGATGTTT), TRCN0000372231 (shL6:  
857 TGAGCTCTCTCTGGTCAATTT), TRCN0000372232 (shL2': TAGCTCCTCAACTC  
858 ACCTAAT), and TRCN0000372175 (shL5': GACTAGAGGCTTGCATAATAA), and 9 non-  
859 overlapping shRNAs against human CD95 mRNA (accession number NM\_000043),  
860 TRCN0000218492 (shR2: CTATCATCCTCAAGGACATTA), TRCN0000038695 (shR5:  
861 GTTGCTAGATTATCGTCCAAA), TRCN0000038696 (shR6: GTGCAGA  
862 TGTAACCAAACCTT), TRCN0000038697 (shR7: CCTGAAACAGTGGCAATAAAT),  
863 TRCN0000038698 (shR8: GCAAAGAGGAAGGATCCAGAT), TRCN0000265627 (shR27':  
864 TTTTACTGGGTACATTTTATC), TRCN0000255406 (shR6': CCCTTGTGTTT  
865 GGAATTATAA), TRCN0000255407 (shR7': TTAAATTATAATGTTTACTA), and  
866 TRCN0000255408 (shR8': ATATCTTTGAAAGTTTGTATT). Infection was carried out  
867 according to the manufacturer's protocol. In brief, 50,000 to 100,000 cells seeded the day before  
868 in a 6-well plate were infected with each lentivirus at an M.O.I of 3 in the presence of 8 µg/ml  
869 polybrene overnight. Media change was done the next day, followed by selection with 3 µg/ml  
870 puromycin 24 hours later. Selection was done for at least 48 hours until puromycin killed the  
871 non-infected control cells. For infection of NB7 cells over-expressing pLenti-CD95L cDNAs  
872 with pLKO lentiviral particles as in **Figure 1C and D**, cells were seeded at 5,000 per well on a  
873 24-well plate and infected with an M.O.I. of 20 to ensure complete infection. For infection of  
874 MCF-7 cells over-expressing pLNCX2-CD95 cDNAs with pLKO lentiviruses as in **Figure 1G**,  
875 cells were seeded at 7,000 per well on a 24-well plate and infected at an M.O.I. of three. 3 µg/ml  
876 puromycin was added 48 hours after infection. For infection of HCT116, Drosha<sup>-/-</sup>, and Dicer<sup>-/-</sup>

877 cells in **Figure 3E**, cells were seeded at 100,000 per well in a 24-well plate and infected at an  
878 M.O.I of three. 3 µg/ml puromycin was added 48 hours after infection.

879

#### 880 **Knockdown with pTIP-shRNA viruses**

881 Cells were plated at 50,000 to 100,000 cells per well in a 6-well plate. Cells were infected with  
882 lentivirus generated in 293T cells from the desired pTIP-shRNA vector in the presence of 8  
883 µg/ml Polybrene. Media was replaced 24 hours later. Selection was done 48 hours after infection  
884 with 3 µg/ml puromycin. Induction of shRNA expression was achieved by adding 100 ng/ml  
885 Dox to the media. For infection with the LT3REPIR-shRNA viruses cells were plated and  
886 infected as described above for pTIP-shRNA viruses. After selection with 3 µg/ml puromycin  
887 was complete, they were plated in 96-well plates and the shRNA expression was induced by  
888 adding Dox (100 ng/ml) to the media. The cell confluency over time was measured using  
889 Incucyte.

890

#### 891 **Transfection with short oligonucleotides**

892 siRNAs were either purchased from Dharmacon (**Figures 2I** and **4D**, **Figure 1 - figure**  
893 **supplement 1A**, **Figure 5 - supplement 2**) or synthesized by IDT (**Figure 3A**) as sense and  
894 antisense RNA (or DNA for **Figure 3B**, **Figure 5 - supplement 1B**,) oligos and annealed. The  
895 sense RNA oligonucleotides had 3' 2 deoxy-T overhangs. The antisense RNA oligos were  
896 phosphorylated at the 5' end and had 3' 2 deoxy-A overhangs. siRNAs targeting CD95L (and  
897 controls) were as follows: siRNA (Scr, sense: UGGUUUACAUGUUGUGUGA), siL1 (sense:  
898 UACCAGUGCUGAUCAUUUA), siL2 (sense: CAACGUAUCUGAGCUCUCU), siL3 (sense:  
899 GCCCUUCAAUUACCCAUAU), siL4 (sense: GGAAAGUGGCCCAUUUAAC), and  
900 siL3MUT (sense: GGACUUCAACUAGACAUCU). The siL3 DNA oligos (sense:  
901 GCCCTTCAATTACCCATAT) and Scr DNA oligos (sense: TGGTTTACATGTTGTGTGA)  
902 were used in **Figure 3B**. Blunt siL3 and siScr RNA oligos without the deoxynucleotide  
903 overhangs as well as siL2 and siL3 RNA oligos with Cy5-labelled 5' or 3' ends (IDT) were used  
904 in **Figure 3C**. DsiRNA used in **Figure 1 - figure supplement 1** were Dsi13.X (sense RNA oligo:  
905 CAGGACUGAG AAGAAGUAAAACcdGdT, antisense RNA oligo:  
906 ACGGUUUUACUUCUUCUCAGUCCUGUA), DsiL3 (sense RNA oligo:  
907 CAGCCCUUCAAUUACCCAUAUCCdCdC, antisense RNA oligo:  
908 GGGGAUAUGGGUAAUUGAAGGGCUGCU), Dsi-13.2 (sense RNA oligo: AUCUU

909 ACCAGUGCUGAUCAUUUAdTdA, antisense RNA oligo:  
910 UAUAAAUGAUCAGCACUGGUAAGAUUG), Dsi-13.3 (sense RNA oligo:  
911 AAAGUAUACUCCGGGGUCAAUcTdT, antisense RNA oligo:  
912 AAGAUUGACCCCGGAAGUAUACUUUGG), Dsi-13.9 (sense RNA oligo:  
913 CUUCCGGGGUCAAUUCUUGCAACAdAdC, antisense RNA oligo: GUUGUUGC  
914 AAGAUUGACCCCGGAAGUA), and a non-targeting DsiRNA control Dsi-NC1 (Sense:5'-  
915 CGUUAUUCGCGUAUAAUACGCGUdAdT, antisense:5'-  
916 AUACGCGUAUUAUACGCGAUUAACGAC, IDT #51-01-14-03). Predesigned siRNA  
917 SmartPools targeting the 11 downregulated genes were obtained from Dharmacon and used in  
918 **Figure 4C** and **Figure 4 - figure supplement 2B and 2C**. Each siRNA SmartPool consisted of 4  
919 siRNAs with On-Target<sup>plus</sup> modification. The following SmartPools were used: L-014208-02  
920 (NUCKS1); L-012212-00 (CAPZA1); L-018339-00 (CCT3); L-013615-00 (FSTL1); L-011548-  
921 00 (FUBP1); L-017242-00 (GNB1); L-014597-01 (NAA50); L-020893-01 (PRELID3B); L-  
922 019719-02 (SNRPE); L-003941-00 (TFRC); L-006630-00 (HIST1H1C). On-Target<sup>plus</sup> non-  
923 targeting control pool (D-001810-10) was used as negative control. Transfection efficiency was  
924 assessed by transfecting cells with siGLO Red (Dharmacon) followed by FACS analysis.

925 HeyA8 cells (and modified cells derived from parental HeyA8 cells) were seeded at 750 cells  
926 per well on a 96-well plate one day before transfection. Cells were transfected using 0.1 µl of  
927 Lipofectamine RNAiMAX reagent per well. HCT116 cells (and modified cells derived from  
928 parental HCT116 cells) were seeded at 4000 cells per well on a 96-well plate one day before  
929 transfection. 0.2 µl of Lipofectamine RNAiMAX was used for transfection. Media was changed  
930 the day after transfection.

931

### 932 **Soluble CD95L protein rescue experiments**

933 NB7 cells were seeded at 500 cells per well in a 96-well plate. Next day, cells were infected with  
934 the scrambled pLKO lentiviruses or pLKO-shL1 lentiviruses at an M.O.I. of 20 (to achieve  
935 100% transduction efficiency under conditions omitting the puromycin selection step) in the  
936 presence of 8 µg/ml polybrene and 100 ng/ml of S2 CD95L or LzCD95L for 16 hrs. Media was  
937 replaced the next day with media containing varying concentrations of recombinant CD95L.

938

### 939 **Real-time PCR**

940 Total RNA was extracted and purified using QIAzol Lysis reagent (QIAGEN) and the  
941 miRNeasy kit (QIAGEN). 200 ng of total RNA was used to generate cDNA using the High-  
942 Capacity cDNA reverse Transcription kit (Applied Biosystems #4368814). cDNA was quantified  
943 using Taqman Gene expression master mix (ThermoFisher Scientific #4369016) with specific  
944 primers from ThermoFisher Scientific for GAPDH (Hs00266705\_g1), human CD95 for **Figure 5**  
945 **-supplement 3** (Hs00163653\_m1), human CD95 3'UTR in **Figure 2F** (custom probe, Fr primer:  
946 *GGCTAACCCCACTCTATGAATCAAT*, Rev primer: *GGCCTGCCTGTTTCAGTAACT*, Probe:  
947 *CCTTTTGCTGAAATATC*), human CD95L (Hs00181226\_g1 and Hs00181225\_m1), the shL3  
948 target site in CD95L in **Figure 2D** (custom probe, Fr primer: *GGTGGCCTTGTGATCAATGAAA*,  
949 Rev primer: *GCAAGATTGACCCCGGAAG TATA*, Probe: *CTGGGCTGTACTTTGTATATT*), and  
950 downstream of the shL3 site in **Figure 2D** (custom probe, Fr primer:  
951 *CCCCAGGATCTGGTGATGATG*, Rev primer: *ACTGCCCCCAGGTAGCT*, Probe:  
952 *CCCACATCTGCCAGTAGT*).

953 To perform arrayed real-time PCR (**Figure 4 - figure supplement 1**), total RNA was  
954 extracted and used to make cDNA as described for standard real-time PCR. For Taqman Low  
955 Density Array (TLDA) profiling, custom-designed 384-well TLDA cards (Applied Biosystems  
956 #43422489) were used and processed according to the manufacturer's instructions. Briefly, 50 µl  
957 cDNA from each sample (200 ng total input RNA) was combined with 50 µl TaqMan Universal  
958 PCR Master Mix (Applied Biosystems) and hence a total volume of 100 µl of each sample was  
959 loaded into each of the 8 sample loading ports on the TLDA cards that were preloaded with  
960 assays from ThermoFisher Scientific for human GAPDH control (Hs99999905\_m1) and for  
961 detection of ATP13A3 (Hs00225950\_m1), CAPZA1 (Hs00855355\_g1), CCT3  
962 (Hs00195623\_m1), FSTL1 (Hs00907496\_m1), FUPB1 (Hs00900762\_m1), GNB1  
963 (Hs00929799\_m1), HISTH1C (Hs00271185\_s1), NAA50 (Hs00363889\_m1), NUCKS1  
964 (Hs01068059\_g1), PRELID3B (Hs00429845\_m1), SNRPE (Hs01635040\_s1), and TFRC  
965 (Hs00951083\_m1) after the cards reached room temperature. The PCR reactions were performed  
966 using Quantstudio 7 (ThermoFisher Scientific). Since each of the port loads each sample in  
967 duplicates on the TLDA card and because two biological replicates of each sample were loaded  
968 onto two separate ports, quadruplicate Ct values were obtained for each sample. Statistical  
969 analysis was performed using Student's t test. Cells were plated at 600,000 per 15 mm dish  
970 (Greiner CELLSTAR, cat#P7237, Sigma) after one day of puromycin selection. Total RNA was  
971 harvested at 50 hours after plating for RNAseq analysis.



972

973 **Western blot analysis**

974 Protein extracts were collected by lysing cells with RIPA lysis buffer (1% SDS, 1% Triton X-  
975 100, 1% deoxycholic acid). Protein concentration was quantified using the DC Protein Assay kit  
976 (Bio-Rad). 30 µg of protein were resolved on 8-12% SDS-PAGE gels and transferred to  
977 nitrocellulose membranes (Protran, Whatman) overnight at 25 mA. Membranes were incubated  
978 with blocking buffer (5% non-fat milk in 0.1% TBS/Tween-20) for 1 hour at room temperature.  
979 Membranes were then incubated with the primary antibody diluted in blocking buffer over night  
980 at 4°C. Membranes were washed 3 times with 0.1% TBS/Tween-20. Secondary antibodies were  
981 diluted in blocking buffer and applied to membranes for 1 hour at room temperature. After 3  
982 more additional washes, detection was performed using the ECL reagent (Amersham Pharmacia  
983 Biotech) and visualized with the chemiluminescence imager G:BOX Chemi XT4 (Synoptics).

984

985 **CD95 surface staining**

986 Cell pellets of about 300,00 cells were resuspended in about 100 µl of PBS on ice. After  
987 resuspension, 5 µl of either anti-CD95 primary antibody (BD #556640) conjugated with  
988 fluorescein isothiocyanate (FitC), or the matching Isotype control (BD #551954), Mouse IgG1 κ  
989 conjugated with FitC, were added. Cells were incubated on ice at 4°C, in the dark, for 25  
990 minutes, washed twice with PBS, and percent green cells were determined by flow cytometry  
991 (Becton, Dickinson).

992

993 **Cell death quantification (DNA fragmentation)**

994 A cell pellet (500,000 cells) was resuspended in 0.1% sodium citrate, pH 7.4, 0.05% Triton X-  
995 100, and 50 µg/ml propidium iodide. After resuspension, cells were incubated 2 to 4 hours in the  
996 dark at 4°C. The percent of subG1 nuclei (fragmented DNA) was determined by flow cytometry.

997

998 **Cell growth and fluorescence over time**

999 After treatment/infection, cells were seeded at 500 to 4,000 per well in a 96-well plate at least in  
1000 triplicate. Images were captured at indicated time points using the IncuCyte ZOOM live cell  
1001 imaging system (Essen BioScience) with a 10x objective lens. Percent confluence, red object  
1002 count, and the green object integrated intensity were calculated using the IncuCyte ZOOM  
1003 software (version 2015A).

1004

1005 **RNA-Seq analysis**

1006 The following describes the culture conditions used to produce samples for RNA-Seq in *Figure*  
1007 *4*. HeyA8  $\Delta$ shR6 clone #11 cells were infected with pLKO-shScr or pLKO-shR6. A pool of three  
1008 293T  $\Delta$ shL3 clones was infected with either pTIP-shScr or pTIP-shL3. After selection with  
1009 puromycin for 2 days, the pTIP-infected 293T cells were plated with Dox in duplicate at 500,000  
1010 cells per T175 flask. The pLKO-infected HeyA8 cells were plated at 500,000 cells per flask.  
1011 Total RNA was harvested 50 hours and 100 hours after plating. In addition, 293T cells were  
1012 infected with either pLKO-shScr or pLKO-shL1 and RNA was isolated (100 hrs after plating) as  
1013 described above for the infection with shR6. Finally, HeyA8 cells were transfected with  
1014 RNAiMAX in 6-wells with siScr (NT2) or siL3 oligonucleotides (Dharmacon) at 25 nM. The  
1015 transfection mix was removed after 9 hours.

1016 Total RNA was isolated 48 hours after initial transfection using the miRNeasy Mini Kit  
1017 (Qiagen, Cat.No. 74004) following the manufacturer's instructions. An on-column digestion  
1018 step using the RNase-free DNase Set (Qiagen, Cat.No.: 79254) was included for all RNA-Seq  
1019 samples.

1020 RNA libraries were generated and sequenced (Genomics Core facility at the University of  
1021 Chicago). The quality and quantity of the RNA samples were checked using an Agilent bio-  
1022 analyzer. Paired end RNA-SEQ libraries were generated using Illumina TruSEQ TotalRNA kits  
1023 using the Illumina provided protocol (including a RiboZero rRNA removal step). Small RNA-  
1024 SEQ libraries were generated using Illumina small RNA SEQ kits using the Illumina provided  
1025 protocol. Two types of small RNA-SEQ sub-libraries were generated: one containing library  
1026 fragments 140-150 bp in size and one containing library fragments 150-200 bp in size (both  
1027 including the sequencing adaptor of about 130bp). All three types of libraries (one RNA-SEQ  
1028 and two small RNA-SEQ) were sequenced on an Illumina HiSEQ4000 using Illumina provided  
1029 reagents and protocols. Adaptor sequences were removed from sequenced reads using  
1030 TrimGalore ([https://www.bioinformatics.babraham.ac.uk/projects/trim\\_galore](https://www.bioinformatics.babraham.ac.uk/projects/trim_galore)), and the trimmed  
1031 reads were mapped to the hg38 assembly of the human genome with Tophat and bowtie2. Raw  
1032 read counts were then assigned to genes using HTSeq. Differential gene expression was analyzed  
1033 with the R Bioconductor DESeq2 package (Love, Huber, & Anders, 2014) using shrinkage  
1034 estimation for dispersions and fold changes to improve stability and interpretability of estimates.  
1035 P values and adjusted P values were calculated using the DESeq2 package.

1036 To identify differentially abundant RNAs in cells expressing either shL3 or shR6, using a  
1037 method unbiased by genome annotation, we also analyzed the raw 100 bp reads for differential  
1038 abundance. First, the second end in each paired end read was reverse complemented, so that both  
1039 reads were on the same strand. Reads were then sorted and counted using the core UNIX utilities  
1040 sort and uniq. Reads with fewer than 128 counts across all 16 samples were discarded. A table  
1041 with all of the remaining reads was then compiled, summing counts from each sequence file  
1042 corresponding to the same sample. This table contained a little over 100,000 reads. The R  
1043 package edgeR (<http://bioinformatics.oxfordjournals.org/content/26/1/139>) was used to identify  
1044 differentially abundant reads, and then these reads were mapped to the human genome using blat  
1045 (<http://genome.cshlp.org/content/12/4/656.abstract>) to determine chromosomal location  
1046 whenever possible. Homer (<http://homer.salk.edu/homer/>) was used to annotate chromosomal  
1047 locations with overlapping genomic elements (such as genes). Raw read counts in each sequence  
1048 file were normalized by the total number of unique reads in the file.

1049 To identify the most significant changes in expression of RNAs both methods of RNAs-Seq  
1050 analyses (alignment and read based) were used to reach high stringency. All samples were  
1051 prepared in duplicate and for each RNA the average of the two duplicates was used for further  
1052 analysis. In the alignment-based analysis, only RNAs that had a base mean of >2000 reads and  
1053 were significantly deregulated between the groups (adjusted p-value <0.05) were considered for  
1054 further analysis. RNAs were scored as deregulated when they were more than 1.5 fold changed  
1055 in the shL3 expressing cells at both time points and in the shR6 expressing cells at either time  
1056 points (each compared to shScr expressing cells) (**Supplementary File 1**). This was done because  
1057 we found that the pLKO driven expression of shR6 was a lot lower than the pTIP driven  
1058 expression of shL3 (see the quantification of the two shRNAs in **Figure 5 - figure supplement**  
1059 **1A**). This likely was a result of the reduced cellular responses in the shR6 expressing cells. In the  
1060 read based analysis, reads were only considered if they had both normalized read numbers of >10  
1061 across the samples in each treatment, as well as less than 2 fold variation between duplicates and  
1062 >1.5 fold change between treatment groups at both time points and both cell lines  
1063 (**Supplementary File 1**). After filtering, reads were mapped to the genome and associated with  
1064 genes based on chromosomal localization. Finally, All RNAs were counted that showed  
1065 deregulation in the same direction with both methods. This resulted in the identification of 11  
1066 RNAs that were down and 1 that was upregulated in cells exposed to the shRNAs shL3 and  
1067 shR6. To determine the number of seed matches in the 3'UTR of downregulated genes, the

1068 3'UTRs of the 11 mRNAs were extracted from the Homo sapiens gene (GRCh38.p7) dataset  
1069 of the Ensembl 86 database using the Ensembl Biomart data mining tool. For each gene, only the  
1070 longest deposited 3'UTR was considered. Seed matches were counted in all 3'UTRs using in-  
1071 house Perl scripts.

1072 GSEA used in **Figure 4D** was performed using the GSEA v2.2.4 software from the Broad  
1073 Institute ([www.http://software.broadinstitute.org/gsea](http://software.broadinstitute.org/gsea)); 1000 permutations were used. The  
1074 Sabatini gene lists (**Supplementary File 2**) were set as custom gene sets to determine enrichment  
1075 of survival genes versus the nonsurvival control genes in downregulated genes from the RNA  
1076 seq data; Adjusted p-values below 0.05 were considered significantly enriched. The GO  
1077 enrichment analysis shown in **Figure 4F** was performed using all genes that after alignment and  
1078 normalization were found to be at least 1.5 fold downregulated with an adjusted p values of  
1079 <0.05, using the software available on [www.Metaspape.org](http://www.Metaspape.org) and default running parameters.

1080

#### 1081 **Conversion of shL3 and shR6 to siRNAs**

1082 From the RNA-Seq analysis with HeyA8  $\Delta$ shR6 infected with pLKO-shR6 and 293T  $\Delta$ shL3  
1083 clones infected pTIP-shL3, we analyzed the mature double-stranded RNAs derived from pLKO-  
1084 shR6 and pTIP-shL3 and found that the most abundant RNA forms were both shifted by one  
1085 nucleotide. Based on these most abundant species observed after cellular processing, we  
1086 converted shL3 and shR6 sequences to siRNAs. The genomic target sequence in shL3 (21nt) is  
1087 5'-ACUGGGCUGUACUUUGUAU-3'. For the shL3 $\Rightarrow$ siL3 sense strand, one G was added  
1088 before the A on the 5' end while the last U on the 3' end was deleted, and second and third to the  
1089 last ribonucleotides on the 3' end (UA) were replaced with deoxyribonucleotides for  
1090 stabilization. For shL3 $\Rightarrow$ siL3 antisense strand, the last three nucleotides on the 5' end (AUA)  
1091 were deleted and one U and two dTs (UdTdT) were added after the last U on the 3'end. The  
1092 shL3 $\Rightarrow$ siL3 sense strand is 5'- GACUGGGCUGUACUUUGUAdTdA-3' and antisense strand is  
1093 5'-/5Phos/UACAAAGUACAGCCCAGUdTdT-3'. The shR6 $\Rightarrow$ siRNA was designed in a  
1094 similar fashion except that two Gs instead of one G were added to the 5' end of the sense strand  
1095 while UUdTdT instead of UdTdT was added to the 3' end of the antisense strand. The genomic  
1096 target sequence in shR6 (21nt) is 5'-GUGCAGAUGUAAACCAAACUU-3'. The shR6 $\Rightarrow$ siR6  
1097 sense strand is 5'-GGGUGCAGAUGUAAACCAAAdCdT-3' and antisense strand is 5'-  
1098 /5Phos/UUUGGUUACAUCUGCACUdTdT-3'. Both shL3 $\Rightarrow$ siL3 and ShR6 $\Rightarrow$ siR6 siRNA  
1099 duplexes were purchased from Dharmacon.

1100  
1101  
1102  
1103  
1104  
1105  
1106  
1107  
1108  
1109  
1110  
1111  
1112  
1113  
1114  
1115  
1116  
1117  
1118  
1119  
1120  
1121  
1122  
1123  
1124  
1125  
1126  
1127  
1128  
1129  
1130  
1131

### **Construction of pTIP-shRNA libraries**

The pTIP-shRNA libraries were constructed by subcloning libraries of 143nt PCR inserts of the form *5'-XXXXXXXXXXXXXXXXXXXXXXXXXXXXXXXXATAGAGATCGNNNNNNNNNNNNNNNNNNNNNNNNCTCGAGNNNNNNNNNNNNNNNNNNNNNNNNNTTTTGTACCGAGCTCGGATCCACTAGTCCAGTGTGGGCATGCTGCGTTGACATTGATT-3'* into the pTIP-shR6 vector after excising the shR6 insert. The poly-N region represents the 21-mer sense and antisense shRNA hairpin. The intervening CTCGAG is the loop region of the shRNA. The 5 libraries targeting Venus, CD95L ORF, CD95L 3'UTR, CD95 ORF, or CD95 3'UTR were composed of every possible 21-mer shRNA (i.e. each nearest neighbor shRNA was shifted by 1 nucleotide). These libraries were synthesized together on a chip as 143 bp single-stranded DNA oligos (CustomArray Inc, Custom 12K oligo pool). Each shRNA pool had its own unique 5' end represented by the poly-X region. This allowed selective amplification of a particular pool using 1 of 5 unique Fr primers (CD95L ORF: *5'-TGGCTTTATATATCTCCCTATCAGTG-3'*, CD95L 3' UTR: *5'-GGTCGTCCTATCTATTATTACACG-3'*, CD95 ORF: *5'-TCTTGTGTCCAGACCAATTTATTTTCG-3'*, CD95 3'UTR: *5'-CTCATTGACTATCGTTTACTGACTG-3'*, Venus: *5'-TATCATCTTTCATGATGACTTCCGG-3'*) and the common reverse primer *5'-AATCAATGTCAACGCAGCAT-3'*. Phusion High Fidelity Polymerase (NEB #M0530) was used to amplify each library pool; standard PCR conditions were used with an annealing temperature of 61°C and 15 cycles. PCR reactions were purified using PCR Cleanup kit (QIAGEN). The pTIP-shR6 vector and each of the amplified libraries were digested with SphI-HF and BsaBI. Digested PCR products were run on either a 2% Agarose gel or a 20% polyacrylamide (29:1) gel made with 0.5 x TBE buffer. PCR products were extracted using either Gel Extraction kit (QIAGEN) for extraction from Agarose gels or via electro-elution using D-Tube Dialyzer Mini columns (Novagen #71504). Purified PCR inserts were then ligated to the linearized pTIP vector with T4 DNA ligase for 24 hours at 16°C. The ligation mixtures were transformed via electroporation in MegaX DH10B T1 cells (Invitrogen #C6400) and plated on 24 cm ampicillin dishes. At least 10 colonies per pool were picked and sequenced to verify successful library construction. After verification, all colonies per library were pooled together and plasmid DNA extracted using the MaxiPrep kit (QIAGEN). The 5 pTIP-shRNA library DNA preps were used to produce virus in 293T cells.

1132 **Lethality screen with pTIP-shRNA libraries**

1133 NB7 cells were seeded at  $1.5 \times 10^6$  per  $145 \text{ cm}^2$  dish. Two dishes were infected with each of the  
1134 5 libraries with a transduction efficiency of about 10 to 20%. Media was replaced next day.  
1135 Infected cells were selected with  $1.5 \text{ }\mu\text{g/ml}$  puromycin. Cells infected with the Venus, CD95L  
1136 ORF, and CD95L 3'UTR-targeting libraries were pooled in a 1:1:1 ratio to make the CD95L cell  
1137 pool. Likewise, cells infected with the Venus, CD95 ORF, and CD95 3'UTR-targeting libraries  
1138 were pooled to make the CD95 receptor cell pool. The CD95 and the CD95L cell pools were  
1139 plated separately each in 2 sets of duplicates seeded at 600,000 cells per  $145\text{cm}^2$  dish. One set  
1140 received 100 ng/ml Dox, and the other one was left untreated (total of 4 dishes per combined  
1141 pool; 2 received no treatment and 2 received Dox). Cells infected with the different libraries  
1142 were also plated individually in triplicate with or without Dox on a 96-well plate to assess the  
1143 overall toxicity of each pool. DNA was collected from each  $145\text{cm}^2$  dish 9 days after Dox  
1144 addition.

1145 The shRNA barcodes were amplified from the harvested DNA template using NEB Phusion  
1146 Polymerase with 4 different pairs of primers (referred to as N, N+1, N+2, and N+3) in separate  
1147 reactions per DNA sample. The N pair consisted of the primers originally used to amplify the  
1148 CD95L ORF library (Fr: 5'-*TGGCTTTATATATCTCCCTATCAGTG*-3' and Rev: 5'-  
1149 *AATCAATGTCAACGCAGCAT*-3'). The N+1 primers had a single nucleotide extension at each  
1150 5' end of the N primers corresponding to the pTIP vector sequence (Fr: 5'-  
1151 *TTGGCTTTATATATCTCCCTATCAGTG*-3' and Rev: 5'-*TAATCAATGTCAACGCAGCAT*-3').  
1152 The N+2 primers had 2 nucleotide extensions (Fr: 5'-  
1153 *CTTGGCTTTATATATCTCCCTATCAGTG*-3' and Rev: 5'-*ATAATCAATGTCAACGCAGCAT*-  
1154 3'), and the N+3 primers had 3 nucleotide extensions (Fr: 5'-  
1155 *TCTTGGCTTTATATATCTCCCTATCAGTG*-3' and Rev: 5'-*AATAATCAATGTCAACGCAGCAT*-  
1156 3'). The barcodes from the pTIP-shRNA library plasmid preparations were also amplified using  
1157 Phusion Polymerase with the N, N+1, N+2, and N+3 primer pairs. The shRNA barcode PCR  
1158 products were purified from a 2% Agarose gel and submitted for 100 bp paired-end deep  
1159 sequencing (Genomics Core facility at the University of Chicago). DNA was quantitated using  
1160 the Qubit. The 4 separate PCR products amplified using N, N+1, N+2, and N+3 were combined  
1161 in equimolar amounts for each sample. Libraries were generated using the Illumina TruSeq PCR-  
1162 free kit using the Illumina provided protocol. The libraries were sequenced using the HiSEQ4000  
1163 with Illumina provided reagents and protocols. Raw sequence counts for DNAs were calculated

1164 by HTSeq. shRNA sequences in the PCR pieces of genomic DNA were identified by  
1165 searching all reads for the sense sequence of the mature shRNA plus the loop sequence  
1166 CTCGAG. To avoid a division by zero problem during the subsequent analyses all counts of zero  
1167 in the raw data were replaced with 1. A few sequences with a total read number <10 across all  
1168 plasmids reads were not further considered. In the CD95L pool this was only one shRNA (out of  
1169 2362 shRNAs) (L792') and in the CD95 20 shRNAs (out of 3004 shRNAs) were not represented  
1170 (R88, R295, R493, R494, R496, R497, R498, R499, R213', R215', R216', R217', R220', R221',  
1171 R222', R223', R225', R226', R258', R946', R1197', R423'). While most shRNAs in both pools  
1172 had a unique sequence two sequences occurred 6 times (L605', L607', L609', L611', L613',  
1173 L615', and L604', L606', L608', L610', L612', L614'). In these cases, read counts were divided by  
1174 6. Two shRNAs could not be evaluated: 1) shR6 in the CD95 pool. It had a significant  
1175 background due to the fact that pTIP-shR6 was used as a starting point to clone all other  
1176 shRNAs. 2) shL3 was found to be a minor but significant contaminant during the infection of  
1177 some of the samples. For each condition, two technical duplicates and two biological duplicates  
1178 were available. To normalize reads to determine the change in relative representation of shRNAs  
1179 between conditions, the counts of each shRNA in a subpool (all replicates and all conditions)  
1180 was divided by the total number of shRNAs in each subpool (%). First, the mean of the technical  
1181 replicates (R1 and R2) was taken. To analyze the biological replicates and to determine the  
1182 changes between conditions, two analyses were performed: 1) The change in shRNA  
1183 representation between the cloned plasmid library and cells infected with the library and then  
1184 cultured for 9 days without Dox (infection -Dox). Fold downregulation was calculated for each  
1185 subpool as  $[(\text{plasmid \%}/\text{-Dox1 \%} + \text{plasmid \%}/\text{-Dox2 \%})/2]$ . 2) The difference in shRNA  
1186 composition between the infected cells cultured with (infection +Dox) and without Dox. Fold  
1187 downregulation was calculated for each subpool as  $[(\text{-Dox1 \%}/\text{+Dox1 \%}) + (\text{-Dox1 \%}/\text{+Dox2 \%}) + (\text{-Dox2 \%}/\text{+Dox1 \%}) + (\text{-Dox2 \%}/\text{+Dox2 \%})/4]$ . Only shRNAs were considered that were at  
1188 least 5-fold underrepresented in either of the two analyses (data in *Supplementary File 3*).  
1189

1190

### 1191 **The toxicity index (TI) and GC content analysis**

1192 The TI in *Figure 7A* is defined by the sum of the counts of a 6mer or 8mer seed match in the  
1193 3'UTRs of critical survival genes divided by the seed match counts in the 3'UTRs of nonsurvival  
1194 genes. We used the 1882 survival genes recently described in a CRISPR/Cas9 lethality screen by  
1195 Wang et al. (Wang et al., 2015). The survival genes were defined by having a CRISPR score of

1196 <-0.1 and an adjusted p-value of <0.05. We chose as a control group to these top essential  
1197 genes the bottom essential genes using inverse criteria (CRISPR score of >0.1 and adjusted p-  
1198 value of <0.05) and are referring to them as the "nonsurvival genes". Both counts were  
1199 normalized for the numbers of genes in each gene set. 3'UTRs were retrieved as described above.  
1200 For the survival genes 1846 and for the nonsurvival genes 416 3'UTRs were found. For each  
1201 gene, only seed matches in the longest 3'UTR were counted. The TI was calculated for each of  
1202 the 4096 possible 6mer combinations and each of the 65536 possible 8mer combinations  
1203 (*Supplementary File 4*). These numbers were then assigned to the results of the shRNA screen  
1204 (*Supplementary File 5*). An alternative TI was calculated in *Figure 7 – figure supplement 1B*  
1205 and is based on the top 850 most highly expressed survival genes (all expressed >1000 average  
1206 reads) and 850 expression matched genes not described to be critical for cancer cell survival  
1207 were selected as controls.

1208 For the analyses in *Figure 7C and D*, the GC content % was calculated for every 6mer in  
1209 the CD95L ORF shRNA pool. The GC content % was then plotted against the log(Fold down)  
1210 for each shRNA in the CD95L ORF shRNA after infection (compared to the plasmid  
1211 composition) in *Figure 7C* and after addition of Dox (compared to cells infected but not treated  
1212 with Dox) in *Figure 7D*. In *Figure 7E*, the log(TI) and GC content % was extracted for every  
1213 possible 6mer and plotted. Pearson correlation coefficient and associated p-value were  
1214 calculated in R3.3.1.

1215

### 1216 **Sylamer analysis**

1217 Sylamer is a tool to test for the presence of RNAi-type regulation effects from a list of  
1218 differentially expressed genes, independently from small RNA measurements (van Dongen et al.,  
1219 2008) (<http://www.ebi.ac.uk/research/enright/software/sylamer>). For short stretches of RNA (in  
1220 this case length 6, 7, and 8 in length corresponding to the lengths of the determinants of seed  
1221 region binding in RNAi-type binding events), Sylamer tests for all possible motifs of this length  
1222 whether the motif occurrences are shifted in sequences associated with the list under  
1223 consideration, typically 3'UTRs when analyzing RNAi-type binding events. A shift or  
1224 enrichment of such a motif towards the down-regulated end of the gene list is consistent with  
1225 upregulation of a small RNA that has the motif as the seed region. Sylamer tests in small  
1226 increments along the list of genes, using a hypergeometric test on the counts of a given word,  
1227 comparing the leading part of the gene list to the universe of all genes in the list. For full details



1228 refer to (van Dongen et al., 2008). Enriched motifs stand out from the back-ground of all  
1229 motifs tested, as visible in the Sylamer plot. The plot consist of many different lines, each line  
1230 representing the outcomes of a series of tests for a single word, performed along regularly spaced  
1231 intervals (increments of 200 genes) of the gene list. Each test yields the log-transformed P-value  
1232 arising from a hypergeometric test as indicated above. If the word is enriched in the leading  
1233 interval the log-transformed value has its value plotted on the positive y-axis (sign changed), if  
1234 the word is depleted the log-transformed value is plotted on the negative y-axis. 3' UTRs were  
1235 used from Ensembl, version 76. As required by Sylamer, they were cleaned of low-complexity  
1236 sequences and repetitive fragments using respectively Dust (Morgulis, Gertz, Schaffer, &  
1237 Agarwala, 2006) with default parameters and the RSAT interface (Medina-Rivera et al., 2015) to  
1238 the Vmatch program, also run with default parameters. Sylamer (version 12-342) was run with  
1239 the Markov correction parameter set to 4.

1240

#### 1241 **Statistical analyses**

1242 Continuous data were summarized as means and standard deviations (except for all IncuCyte  
1243 experiments where standard errors are shown) and dichotomous data as proportions. Continuous  
1244 data were compared using t-tests for two independent groups and one-way ANOVA for 3 or  
1245 more groups. For evaluation of continuous outcomes over time, two-way ANOVA was used with  
1246 one factor for the treatment conditions of primary interest and a second factor for time treated as  
1247 a categorical variable to allow for non-linearity. Comparisons of single proportions to  
1248 hypothesized null values were evaluated using binomial tests. Statistical tests of two independent  
1249 proportions were used to compare dichotomous observations across groups.

1250 The effects of treatment on wild-type versus either Dicer<sup>-/-</sup> or Drosha<sup>-/-</sup> cells were statistically  
1251 assessed by fitting regression models that included linear and quadratic terms for value over  
1252 time, main effects for treatment and cell type, and two- and three-way interactions for treatment,  
1253 cell-type and time. The three-way interaction on the polynomial terms with treatment and cell  
1254 type was evaluated for statistical significance since this represents the difference in treatment  
1255 effects over the course of the experiment for the varying cell types.

1256 To test if higher TI is enriched in shRNAs that were highly downregulated, p-values were  
1257 calculated based on permuted datasets using Mann-Whitney U tests. The ranking of TI was  
1258 randomly shuffled 10,000 times and the W statistic from our dataset was compared to the  
1259 distribution of the W statistic of the permuted datasets. Test of enrichment was based on the

1260 filtered data of at least 5-fold difference, which we define as a biologically meaningful. Fisher  
1261 Exact Tests were performed to assess enrichment of downregulated genes (i.e. >1.5  
1262 downregulated with adjusted p-value <0.05) amongst genes with at least one si/shRNA seed  
1263 match. All statistical analyses were conducted in Stata 14 (RRID:SCR\_012763) or R 3.3.1 in  
1264 Rstudio (RRID:SCR\_000432).

1265

1266 **Data availability**

1267 The accession number for the RNA-Seq and expression data reported in this manuscript are  
1268 GSE87817.

1269

1270 **Acknowledgements**

1271 We are grateful to Lindsay Stolzenburg and Ann Harris for helping to set up the CRISPR/Cas9  
1272 gene editing method and to Matthew Schipma for computational support. We would like to thank  
1273 the Gene Editing & Screening Core, at Memorial Sloan Kettering in New York City, NY, for  
1274 RNAi reagents and services. M.H. was supported by the Intramural Research Program of  
1275 NIAMS. A.A.S. acknowledges support by the Swedish Research Council postdoctoral  
1276 fellowship. This work was funded by training grants T32CA070085 (to M.P.) and  
1277 T32CA009560 (to W.P.) R50CA211271 (to J.C.Z.), and R35CA197450 (to M.E.P.).

1278

1279 **Competing financial interests**

1280 The authors declare no competing financial interests.

1281

1282 **Figure legends**

1283

1284 **Figure 1**

1285 **Exogenous CD95L or CD95 proteins do not protect cells from toxicity of CD95L/CD95**  
1286 **derived shRNAs.**

1287 (A) *Left:* Percent cell confluence over time of NB7 cells after infection with either pLKO-shScr  
1288 or pLKO-shL1 and concurrent treatment with different concentrations of soluble CD95L protein  
1289 (S2). Two-way ANOVA was performed for pairwise comparisons of % confluence over time  
1290 between shScr expressing cells untreated or treated with 100 ng/ml S2. Each data point  
1291 represents mean  $\pm$  SE of three replicates. *Center:* Percent cell confluence over time of NB7 cells  
1292 after infection with either pLKO-shScr or pLKO-shL1 and concurrent treatment with different  
1293 concentrations of leucine zipper tagged (Lz)CD95L protein. Two-way ANOVA was performed  
1294 for pairwise comparisons of % confluence over time between shScr expressing cells untreated or  
1295 treated with 50 ng/ml LzCD95L. Each data point represents mean  $\pm$  SE of three replicates. *Right:*  
1296 Percent nuclear PI staining of MCF-7 cells 24 hours after adding different amounts of LzCD95L.  
1297 (B) Schematic of the eight silent mutations introduced to the shL1 and the shL3 target sites of  
1298 CD95L. (C) Western blot analysis of CD95L and  $\beta$ -actin in NB7 cells over-expressing CD95L-  
1299 WT, CD95L-L1MUT, or CD95L-L3MUT 3 days after infection with pLKO-shScr, pLKO-shL1,  
1300 or pLKO-shL3. Shown is one of two repeats of this analysis. (D) Percent nuclear PI staining of  
1301 NB7 cells expressing empty pLenti vector, CD95L-WT, CD95L-L1MUT, or CD95L-L3MUT 6  
1302 days after infection with either pLKO-shScr, pLKO-shL1, or pLKO-shL3. Each bar represents  
1303 mean  $\pm$  SD of three replicates. (E) Schematic of the 8 silent mutations introduced at the shR6 site  
1304 of CD95. (F) Western blot analysis of CD95 and  $\beta$ -actin in MCF-7 cells over-expressing CD95-  
1305 WT or CD95-R6MUT. (G) Percent nuclear PI staining of MCF-7 cells expressing empty  
1306 pLNCX2 vector, CD95-WT, or CD95-R6MUT 6 days after infection with pLKO-shScr, pLKO-  
1307 shR6, or pLKO-shR7. Each bar represents mean  $\pm$  SD of three replicates.

1308

1309 **Figure 1 - figure supplement 1.**

1310 **The majority of siRNAs and shRNAs targeting CD95L or CD95 are toxic.**

1311 (A) Location of target sites, growth inhibitory activities and toxicity of all tested siRNAs,  
1312 DsiRNAs, and pLKO-shRNAs targeting CD95L and CD95. Experiments were performed in  
1313 HeyA8 cells at an MOI of 3 for pLKO-shRNA infection, transfected with 25 nM of siRNAs, or 5  
1314 nM of DsiRNAs. Color code indicates the level of growth reduction caused by each sh/siRNA.  
1315 sh/siRNAs labeled with an asterisk induced significant cell death as monitored by nuclear PI  
1316 staining. Both exon/intron structure and protein domains are shown for both CD95L and CD95.  
1317 EC, extracellular domain; TM, transmembrane domain; IC, intracellular domain. Data on growth  
1318 reduction of DsiRNAs were performed in triplicates and in two independent experiments. Data  
1319 on growth reduction of siRNAs were performed in 4 replicates and in two independent  
1320 experiments. Data on growth reduction of shRNAs were performed in triplicate and in two  
1321 independent experiments. Data on nuclear fragmentation by siRNAs were performed in triplicate  
1322 in two independent experiments. Data on nuclear fragmentation by shRNAs were performed in  
1323 triplicate. (B) PI staining was used to quantify percent subG1 of HeyA8 cells 4 days after  
1324 transfection with 5 nM of CD95L derived DsiRNAs. Data are representative of three  
1325 independent experiments. Each bar represents mean  $\pm$  SD of four replicates (p-value \*\*\*  
1326  $p < 0.0001$ , unpaired t-test). (C) Level of underrepresentation (toxicity) of shRNAs targeting  
1327 either CD95L (left column) or CD95 (right column) across 216 human cancer cell lines as  
1328 described in (Cowley et al., 2014). The fraction of cell lines for which an shRNA was found to  
1329 be toxic is given in percentage For shL5 data on only 197 cell lines were available. This screen

1330 did not include shL3, but another CD95 derived shRNA we did not test (we now call shR3)  
1331 was found to be toxic to 71.8% of the 216 cell lines.

1332

1333 **Figure 1 - figure supplement 2.**

1334 **Toxicity of si/shRNAs is dose dependent.**

1335 (A) Sequences of the 6 toxic TRC shRNAs (pLKO vector) that were converted into miR-30  
1336 based shRNAs (Tet inducible LT3REPIR vector). (B) Confluence over time of NB7-Venus-  
1337 CD95L (left) or NB7-Venus CD95 (right) cells infected with the LT3REPIR vector minus/plus  
1338 Dox to induce expression of the indicated shRNAs. (C) Total green fluorescence over time of the  
1339 experiment shown in B. (D) Confluence (top) and total green fluorescence (bottom) over time of  
1340 NB7-Venus-CD95L (left) or NB7-Venus CD95 (right) cells infected with the pTIP vector  
1341 minus/plus Dox to induce expression of the indicated shRNAs. (E) Confluence over time of  
1342 HeyA8 cells transfected with the indicated concentration of either siScr or siL3. Each data point  
1343 represents mean  $\pm$  SE of six replicates. The experiment was repeated three times.

1344

1345 **Figure 2.**

1346 **CD95 and CD95L derived si/shRNAs kill cells in the absence of the targeted sites in CD95  
1347 or CD95L.**

1348 (A) Schematic of the genomic locations and sequences of the gRNAs used to excise the siL3  
1349 ( $\Delta$ 64bp) and shL3 ( $\Delta$ 41bp) target sites from CD95L. PAM site is underlined. Green indicates a  
1350 gRNA targeting the sense strand. Blue indicates a gRNA targeting the antisense strand. (B)  
1351 Schematic showing the genomic locations and sequences of the gRNAs used to excise the shR6  
1352 ( $\Delta$ 227bp) target site. (C) PCR with flanking (*top panels*) and internal (*bottom panels*) primers  
1353 used to confirm the  $\Delta$ 41 deletion in the shL3 site in one of the three homozygous deletion 293T  
1354 clones generated. Cells transfected with Cas9 only (Cas9) are wild-type. (D) Quantitative PCR  
1355 for endogenous CD95L with a primer downstream of the  $\Delta$ 41 shL3 deletion and another primer  
1356 internal to the deleted region. nd, not detectable. Each bar represents mean  $\pm$  SD of three  
1357 replicates. (E) PCR with flanking (*top row*) and internal (*bottom row*) primers used to confirm  
1358 the presence of the shL3  $\Delta$ 41 (*top panel*), siL3  $\Delta$ 64 (*middle panel*), and shR6  $\Delta$ 227 (*bottom*  
1359 *panel*) deletions in HeyA8 clones. Mix, HeyA8 cells after transfection with Cas9 and gRNAs but  
1360 before single cell cloning. (F) Quantitative PCR for CD95 in HeyA8 cells transfected with Cas9  
1361 plasmid (Cas9) alone, or the HeyA8  $\Delta$ shR6 clone #11. RNA was extracted 5 days after infection  
1362 with pLKO-shScr, pLKO-shR6, pLKO-shR2, or pLKO-shR6' (targeting the 3'UTR). Each bar  
1363 represents mean  $\pm$  SD of three replicates. (G) Percent cell confluence over time of 293T cells  
1364 (*left*) and a pool of three 293T clones with a homozygous deletion of the shL3 target site (*right*)  
1365 infected with pTIP-shScr or pTIP-shL3 and treatment with or without Dox. Data are  
1366 representative of two independent experiments. Each data point represents mean  $\pm$  SE of six  
1367 replicates. (H) *Left*: Percent confluence over time of HeyA8 cells infected with pLKO-shScr,  
1368 pLKO-shR6, or pLKO-shL3. *Center*: Percent confluence over time of a HeyA8 clone with a  
1369 homozygous deletion of the shR6 target site infected with either pLKO-shScr or pLKO-shR6.  
1370 *Right*: Percent confluence over time of a pool of three HeyA8 clones with a homozygous  
1371 deletion of the shL3 site infected with either pLKO-shScr or pLKO-shL3. Data are representative  
1372 of two independent experiments. Each data point represents mean  $\pm$  SE of three replicates. (I)  
1373 Percent confluence over time of a pool of three HeyA8 clones harboring a homozygous deletion  
1374 of the siRNA siL3 target site after transfection with different concentrations of siScr or siL3.  
1375 Data are representative of three independent experiments. Each data point represents mean  $\pm$  SE  
1376 of three replicates.

1377

1378 **Figure 2 - figure supplement 1.**

1379 **Knockout of CD95 in HeyA8 cells.**

1380 (A) PCR showing a  $\Delta 227$  shR6 deletion and insertions in HeyA8 clones #1 and #2. (B)  
1381 Schematic of the  $\Delta 227$  deletion in allele #1 and partial insertion of a pSC-B plasmid fragment in  
1382 allele #2 in HeyA8 clone #2 based on Sanger sequencing of isolated bands from PCR shown in  
1383 A. Note, cl#1 and #2 have the expected  $\Delta 227$  shR6 deletion in one allele and an insertion in the  
1384 other. cl#11 has a homozygous  $\Delta 227$  shR6 deletion. The deleted region is shown in green  
1385 containing the shR6 target site in red. pSC-B vector sequences are shown in blue letters, and the  
1386 insertion is shown in orange. (C) Western blot for CD95 and  $\beta$ -actin in Cas9-control transfected  
1387 HeyA8 cells and HeyA8 shR6 k.o. clones #1, #2, and #11. Shown is one of two repeats of this  
1388 analysis. (D) Surface staining for CD95 in parental HeyA8 cells and HeyA8 shR6 knockout  
1389 clones #1, #2, and #11. Shown is one of two repeats of this analysis. (E) Images showing  
1390 apoptosis induction with LzCD95L treatment (4.5 hrs) in parental HeyA8 cells but not in clone  
1391 #2.

1392

1393 **Figure 3.**

1394 **Toxicity of CD95L derived siRNAs involves canonical RNAi activity.**

1395 (A) Percent cell confluence (*left*) and total green object integrated intensity (*right*) over time of a  
1396 HeyA8 CD95 knockout clone ( $\Delta R6$  cl#2) expressing the Venus-CD95L sensor either untreated  
1397 (Ctr) or after transfection with 25 nM of single-stranded sense, single-stranded antisense, or  
1398 double-stranded (ds) siScr or siL3 siRNAs. The CD95L sensor is schematically shown and  
1399 comprises the Venus ORF fused to the CD95L ORF lacking the A of the ATG start codon (X).  
1400 Data are representative of two independent experiments. Each data point represents mean  $\pm$  SE  
1401 of three replicates. (B) Percent cell confluence (*left*) and total green object integrated intensity  
1402 (*right*) over time of the HeyA8 CD95L sensor cell used in *Figure 3A* after transfection with 5  
1403 nM siScr or siL3 double-stranded RNA (dsRNA) or double-stranded DNA (dsDNA). Data are  
1404 representative of two independent experiments. Each data point represents mean  $\pm$  SE of three  
1405 replicates. (C) Summary of experiments to test whether siL3 and siL2 siRNAs modified as  
1406 indicated (*left*) were active (check mark) or not (X) in reducing green fluorescence or cell growth  
1407 (both  $>70\%$  reduction at end point) when transfected at 25 nM (except for blunt end  
1408 oligonucleotides which were used at 5 nM and compared to 5 nM of siL3) into HeyA8 CD95L  
1409 sensor cells used in *Figure 3A*. Endpoints were 164 hours for blunt end siRNA transfection, 180  
1410 hrs for modified siL3 and 144 hrs for modified siL2 siRNA transfections. Every data row is  
1411 based on cell growth and green fluorescence quantification data executed as shown in A. Each  
1412 analysis was done in triplicate and based on two independent repeats. (D) Red object count over  
1413 time of HeyA8 cells (expressing NucRed) after transfection with different ratios of siL3 and  
1414 mutant siL3 (siL3MUT). Data are representative of two independent experiments. Each data  
1415 point represents mean  $\pm$  SE of three replicates. (E) Percent cell confluence over time of HCT116  
1416 parental (*left*) or Dicer<sup>-/-</sup> (clone #43, another Dicer<sup>-/-</sup> clone, #45, gave a similar result, data not  
1417 shown), or Drosha<sup>-/-</sup> (*right*) cells after infection with either shScr, shL3 or shR6 pLKO viruses.  
1418 Inserts show the level of protein expression levels of Drosha/Dicer and AGO2 levels in the tested  
1419 cells. Data are representative of three independent experiments. Each data point represents mean  
1420  $\pm$  SE of four replicates. Drosha<sup>-/-</sup> cells were more sensitive to toxic shRNAs than wt cells  
1421 ( $p < 0.0001$ , according to a polynomial fitting model). (F) Western blot analysis of HCT116 wt,  
1422 Dicer<sup>-/-</sup> or Drosha<sup>-/-</sup> cells 4 days after infection with either pLKO-shScr or pLKO-shR6. (G)  
1423 Percent cell confluence over time of HCT116 wt, Dicer<sup>-/-</sup> (clone #43) and Drosha<sup>-/-</sup> cells after  
1424 transfection with 25 nM siScr or siL3. Data are representative of four independent experiments  
1425 (Dicer<sup>-/-</sup> clone #45, gave a similar result, data not shown). Each data point represents the mean  $\pm$

1426 SE of four replicates. Data in insert confirm similar uptake of transfected siRNA (25 nM of  
1427 siGLO Red) into wild-type, Dicer<sup>-/-</sup> and Drosha<sup>-/-</sup> cells. Dicer<sup>-/-</sup> and Drosha<sup>-/-</sup> cells were more  
1428 sensitive to siL3 than wt cells (p<0.0001, according to a polynomial fitting model). **(H)** Percent  
1429 reduction in Venus expression (green) and in cell number (red object count (red)) over time of  
1430 HeyA8 cells expressing the Venus-CD95L sensor and red nuclei after transfection with 5 nM of  
1431 different chimeric siRNAs generated by substituting nucleotides in the toxic siL3 with the  
1432 scrambled siRNA sequence beginning at either the seed match end (top) or the opposite end  
1433 (bottom) of siL3 after 188 hours. The schematic in the middle shows the sequence of siL3 and  
1434 the siScr siRNA (both sense and antisense strands). The 6mer seed sequence region of siL3  
1435 (positions 2 to 7) is highlighted in light blue. Nucleotides shared by siScr and siL3 are shown in  
1436 grey font. Data are representative of two independent experiments. Each data point represents  
1437 mean of three replicates. In another independent experiment cells were transfected with 25 nM  
1438 with a very similar result (data not shown).

1439

#### 1440 **Figure 4.**

#### 1441 **Toxic shRNAs derived from CD95 and CD95L cause downregulation of critical survival** 1442 **genes.**

1443 **(A)** Schematic of RNA-Seq work flow for total RNA sample prepared both before (50 hrs) and  
1444 during (100 hrs) DISE after expressing either shR6 or shL3 from different vector systems (i.e.  
1445 pLKO-shR6 and pTIP-shL3) in different cells (HeyA8 shR6  $\Delta$ 227 cells and 293T shL3  $\Delta$ 41  
1446 cells). **(B)** One mRNA was up and 11 mRNAs were downregulated in the cells treated with toxic  
1447 shL3 and shR6 as shown in *Figure 4A*. mRNAs shown in red were found to be essential cancer  
1448 survival genes in two genome-wide lethality screens. The number of essential genes was  
1449 enriched from 6.6% of the tested genes (Blomen et al., 2015; Wang et al., 2015) to 54.5% in our  
1450 study (p=3 x 10<sup>-6</sup> according to binomial distribution). **(C)** The level of growth inhibition  
1451 observed in HeyA8 cells transfected with siRNA SmartPools (25 nM) individually targeting the  
1452 listed survival genes. Targeting the seven genes shown significantly reduced cell growth  
1453 compared to cells transfected with a siScr pool at 140 hrs (samples done in quadruplicate in two  
1454 independent experiments) with an ANOVA p<0.05. **(D)** Gene set enrichment analysis for a  
1455 group of 1846 survival genes (*top 4 panels*) and 416 nonsurvival genes (*bottom 4 panels*)  
1456 identified in a genome-wide CRISPR lethality screen (Wang et al., 2015) after introducing Dox-  
1457 inducible shL3 in 293T  $\Delta$ shL3 cells (*left-most panels*), shR6 in HeyA8  $\Delta$ shR6 cells (*center-left*  
1458 *panels*), shL1 in parental 293T cells (*center-right panels*), and siL3 in HeyA8 cells (*right-most*  
1459 *panels*). Scrambled sequences served as controls. p-values indicate the significance of  
1460 enrichment. **(E)** Schematics showing all RNAs at least 1.5 fold downregulated (adj p-value  
1461 <0.05) in cells treated as in *Figure 4A*. Histones that are underlined contain a 3'UTR. **(F)**  
1462 Metascape analysis of the 4 RNA Seq data sets analyzed. The boxed GO term clusters were  
1463 highly enriched in all data sets.

1464

#### 1465 **Figure 4 - figure supplement 1.**

#### 1466 **Down-regulation of critical survival genes after treatment with CD95 and CD95L-derived** 1467 **shRNAs and siRNAs.**

1468 **(A)** Arrayed quantitative PCR of genes found to be down-regulated (or upregulated as with  
1469 ATP13A3) in *Figure 4B* both in 293T  $\Delta$ shL3-pTIP-shL3 cells 50 hrs post-Dox treatment and  
1470 HeyA8  $\Delta$ shR6-pLKO-shR6 100 hrs post infection and puromycin selection. Data are  
1471 representative of two independent experiments. Each bar represents mean  $\pm$  SD of two biological  
1472 replicates and two technical replicates (p-value \*<0.05, \*\*<0.005, unpaired t-test). **(B)** Venn  
1473 diagram showing overlap of genes determined to be down-regulated with both read-based and

1474 alignment-based analyses of the RNA-Seq data depicted in *Figure 4A* with the critical  
1475 survival genes found in the Sabatini and Brummelkamp studies (Blomen et al., 2015; Wang et  
1476 al., 2015), all listed in **Supplementary File 2**. The Venn diagram was generated using  
1477 <http://bioinformatics.psb.ugent.be/webtools/Venn>. (C) Kinetic quantitative PCR of the down-  
1478 regulated genes in the 293T  $\Delta$ shL3 pTIP-shL3 cells. RNA was collected at 14 hrs, 26 hrs, and 50  
1479 hrs after treatment with Dox. NS, not significant. Each bar represents mean  $\pm$  SD of  
1480 quadruplicates (p-value \* $<0.05$ , \*\* $<0.005$ , unpaired t-test). (D) Table showing which genes were  
1481 significantly (p $<0.05$ ) down-regulated  $>1.5$  fold (indicated by an “X”) in parental HeyA8 cells  
1482 80 hrs after transfection with siL3 or 100 hrs after infection and puromycin selection with  
1483 pLKO-shL1, pLKO-shL3, or pLKO-shR7.

1484 The following describes the 11 genes that were significantly downregulated after introducing the  
1485 toxic shRNAs shL3 or shR6 into cancer cells (see **Figure 4B**) and some of their cancer relevant  
1486 activities:

- 1487 1) CAPZA1 (capping actin protein of muscle Z-line alpha subunit 1) is an actin capping protein.  
1488 CAPZA1 knockdown has been reported to cause disassembly of autophagosomes (Mi et al.,  
1489 2015). It is overexpressed in malignant melanoma (Sun et al., 2011).
- 1490 2) CCT3 (chaperonin containing TCP1 subunit 3) is part of a chaperone complex that folds  
1491 various proteins including actin and tubulin. CCT3 is required for proper mitotic progression  
1492 (Zhang et al., 2016).
- 1493 3) FSTL1 (follistatin-like 1) is a putative activin-binding protein. Knockdown of FSTL1 in lung  
1494 cancer cells resulted in mitotic arrest followed by apoptosis promoted by the activation of  
1495 caspase-3 and -9 (Bae et al., 2016). FSTL1 is downregulated during cellular senescence of  
1496 human mesenchymal stem cells (Yoo, Choi, & Kim, 2013).
- 1497 4) FUBP1 (far upstream element binding protein 1). A lack of FUBP1 causes a cell-autonomous  
1498 defect in the maintenance of fetal and adult hematopoietic stem cells (HSCs). FUBP1-  
1499 deficient adult HSCs exhibit significant transcriptional changes, including upregulation of the  
1500 cell-cycle inhibitor p21 and the pro-apoptotic Noxa molecule, suggesting they undergo  
1501 apoptosis (Rabenhorst et al., 2015). In addition, FUBP1 binds to an upstream element of the c-  
1502 myc promoter and regulates c-myc mRNA level, thus regulating proliferation (Jang et al.,  
1503 2009). Finally, FUBP1 is upregulated in many tumors and acts as an oncoprotein by  
1504 stimulating proliferation and inhibiting apoptosis (Baumgarten et al., 2014).
- 1505 5) GNB1 (G-protein beta subunit 1) is tumor-promoting in breast cancer. Data suggest that GNB1  
1506 plays an important role in the mTOR-related anti-apoptosis pathway (Wazir, Jiang, Sharma, &  
1507 Mokbel, 2013).
- 1508 6) HIST1H1C. A specific role of this particular histone in cancer cell survival has not yet been  
1509 described. (Knockdown causes cell cycle arrest in MCF-7 cells;  
1510 (<http://journals.plos.org/plosgenetics/article?id=10.1371/journal.pgen.1000227>)).
- 1511 7) NAA50 (N(alpha)-acetyltransferase 50, NatE catalytic subunit) is required for sister chromatid  
1512 separation *in vivo* (Hou, Chu, Kong, Yokomori, & Zou, 2007).
- 1513 8) NUCKS1 (nuclear casein kinase and cyclin dependent kinase substrate 1) is a chromatin-  
1514 associated protein with a role in the DNA damage response. Knocking down NUCKS1 causes  
1515 chromosomal breaks (Parplys et al., 2015).
- 1516 9) PRELID3B (PRELI domain containing 3B) is an inner mitochondrial protein. Knocking down  
1517 PRELID3B decreases cell viability ([http://www.genecards.org/cgi-](http://www.genecards.org/cgi-bin/carddisp.pl?gene=PRELID3B)  
1518 [bin/carddisp.pl?gene=PRELID3B](http://www.genecards.org/cgi-bin/carddisp.pl?gene=PRELID3B)).
- 1519 10) SNRPE (small nuclear ribonucleoprotein polypeptide E). siRNA-mediated depletion of  
1520 SNRPE stimulated autophagy and led to a marked reduction of cell viability in breast, lung,



1521 and melanoma cancer cell lines, whereas it had little effect on the survival of the  
1522 nonmalignant MCF-10A breast epithelial cells (Quidville et al., 2013).  
1523 11) TFRC (transferrin receptor). Blocking TFRC function with a neutralizing antibody inhibits  
1524 cell proliferation and survival (Pham et al., 2014). Suppression of TFRC led to apoptosis of  
1525 renal cells (Gui et al., 2013) and cell cycle arrest in esophageal squamous cell carcinoma cells  
1526 (Chan et al., 2014).

1527

1528 **Figure 4 - figure supplement 2.**

1529 **Characterization of the six genes downregulated in shL3 and shR6 treated cells and found**  
1530 **to be critical survival genes in lethality screens.**

1531 (A) The six downregulated survival genes were queried individually using default settings with  
1532 all studies selected in the cBioPortal for Cancer Genomics hosted by Memorial Sloan Kettering  
1533 Cancer Center (<http://www.cbioportal.org/>) (Cerami et al., 2012; Gao et al., 2013). Datasets with  
1534 alterations in 5 out of the 6 essential genes reporting both copy number alterations and  
1535 mutational data were included. To avoid reporting duplicate datasets, The Cancer Genome Atlas  
1536 publications were excluded. After filtering, 33 datasets representing cancers from 23 different  
1537 sites reported alterations in the downregulated survival genes. (B) Percent confluence over time  
1538 of HeyA8 cells transfected with increasing concentrations of a pool of siRNAs (28 different  
1539 siRNAs) targeting 7 different genes: CCT3, TFRC, NAA50, FUBP1, PRELID3B, GNB1 and  
1540 FSTL1. Each siRNA SmartPool was comprised of 4 individual siRNAs. Data are representative  
1541 of two independent experiments. Values were calculated from samples done in quadruplicates  
1542 shown as mean  $\pm$  SE. (C) PI staining used to quantify percent subG1 for cells 4 days after  
1543 transfection with 1 nM and 5 nM of combined siRNA pools targeting the 7 different survival  
1544 genes as in B. Data are representative of two independent experiments. Values were calculated  
1545 from samples done in quadruplicates shown as mean  $\pm$  SD. \*\*\*  $p < 0.0001$ , unpaired t-test.

1546

1547 **Figure 4 - figure supplement 3.**

1548 **Histones are downregulated in all forms of DISE but are not the most highly expressed**  
1549 **genes in cells.**

1550 MA plots comparing the expression level (counts per million, CPM) and fold change in the four  
1551 RNA Seq data sets in this study. Shown are all RNAs that were  $>1.5$  fold deregulated with an  
1552 adjusted p-value of  $<0.01$ . Significantly downregulated RNAs are shown in green, upregulated  
1553 RNAs in cyan. All 73 histones are shown as dark blue dots and the 12 histones downregulated in  
1554 all 4 data sets are shown as red dots.

1555

1556 **Figure 5.**

1557 **DISE inducing si/shRNAs target critical survival genes through RNAi.**

1558 (A) Sylamer plots for the list of genes in the shL3 experiment (left) and the shR6 experiment  
1559 (right) ordered from down-regulated to up-regulated. The most highly enriched sequence is  
1560 shown which in each case is the 8mer seed match of the introduced shRNA. The red line  
1561 corresponds to a p-value threshold of 0.05 after Bonferroni correction for the number of words  
1562 tested (65536). Bonferroni-adjusted p-values are shown. The unadjusted p-values are  $1.58E-24$   
1563 and  $1.35E-26$ , respectively. The black line represents the sequences carrying the let-7 8mer seed  
1564 match. (B) Location of the 6mer seed matches of either shL3 or shR6 in the 3'UTRs of the 11  
1565 genes (shown at scale) identified in the RNA-Seq experiment described in *Figure 4A*. Red font  
1566 indicates a critical survival gene. (C) A series of six 2x2 contingency tables comparing whether  
1567 or not a critical survival gene is downregulated after treatment with the indicated siRNA or  
1568 shRNA to whether or not its 3'UTR contains at least 1 seed match for the introduced sh/siRNA.

1569 p-values were calculated using Fisher's Exact Test to determine any significant relationship  
1570 between gene downregulation and presence of seed matches in 3'UTR.  
1571

1572 **Figure 5 - figure supplement 1.**

1573 **Quantification of the mature shRNA forms.**

1574 (A) Graphical representation of the percentage of the different Dicer cut sites to produce the  
1575 mature passenger (top) and guide (bottom) strands of 3 shRNAs expressed from two vectors. All  
1576 analyses were performed with cells 50 hrs after either Dox addition (in pTIP expressing cells) or  
1577 infection with the pLKO virus. Letters in green: vector sequences; black: passenger and guide  
1578 strands of shRNAs; Arrow heads label the most highly cleaved residues; the darker the arrow  
1579 head the more highly cleaved. Numbers in yellow box represent total number of reads detected  
1580 for passenger and guide strands. (B) Percent cell confluence in HeyA8 cells after transfection  
1581 with shL3=>siL3 (shL3 converted to an siRNA) or shR6=>siR6 (shR6 converted to an siRNA).  
1582 Conversion was based on the most common mature double-stranded RNA form produced as  
1583 indicated by the results in A. Data are representative of two independent experiments. Each bar  
1584 represents mean  $\pm$  SE of four replicates. Insert: percent DNA fragmentation in the same samples.  
1585 Data are representative of two independent experiments. Each bar represents mean  $\pm$  SD of four  
1586 replicates, \*\*\* p<0.0001, unpaired t-test.  
1587

1588 **Figure 5 - figure supplement 2.**

1589 **Identification of seed matches targeted by shL1 and siL3.**

1590 Sylamer plots for the list of genes in the shL1 experiment (293T cells 100 hrs after infection with  
1591 pLKO-shL1) (left) and the siL3 experiment (48 hrs after transfection of HeyA8 cells with siL3)  
1592 (right) ordered from down-regulated to up-regulated. The most highly enriched sequences are  
1593 shown which in each case is the 7mer seed match of the introduced shRNA. The red line  
1594 corresponds to a p-value threshold of 0.05 after Bonferroni correction for the number of words  
1595 tested. Bonferroni-adjusted p-values are shown.  
1596

1597 **Figure 5 - figure supplement 3.**

1598 **Activity to knockdown CD95 does determine shRNA toxicity.**

1599 HeyA8 cells infected with the indicated shRNAs in the pLKO vector were analyzed for toxicity  
1600 (top, % percent reduction at half maximal confluency), CD95 expression by Western blot  
1601 analysis (center, 2 days after puromycin addition) and qPCR analysis (bottom, 3 days after  
1602 puromycin addition). Shown data are representative of two independent experiments. +++,  
1603 >75%; ++, >50%; +, >10%; -, <10% growth reduction.  
1604

1605 **Figure 6.**

1606 **Identifying all toxic shRNAs derived from CD95L and CD95.**

1607 (A) Schematic showing the cloned shRNAs covering the ORF of Venus and the ORFs and  
1608 3'UTRs of CD95L and CD95. The 3'UTR is displayed as a dashed line because it was not  
1609 included in the full-length Venus-CD95L/CD95 sensors. (B) Work-flow of pTIP-shRNA library  
1610 synthesis, shRNA screen and data analysis. (C) Ranked fold reduction of shRNAs spanning  
1611 Venus and CD95L (ORF and 3'UTR) (*left 3 panels*) and Venus and CD95 (ORF and 3'UTR)  
1612 (*right 3 panels*). The ranked lists were separated into the shRNAs derived from Venus (top), the  
1613 ORFs (center) and the 3'UTRs (bottom). The p-value of enrichment for each ranked set of  
1614 shRNAs is given. Only the parts of the ranked lists are shown with the downregulated shRNAs.  
1615 For all 6 panels, the top section of each panel (boxed in blue) contains the data on shRNAs  
1616 downregulated after infection of cells and cultured for 9 days without Dox when compared to the

1617 composition of the shRNA plasmid library and the bottom half (boxed in orange) contains the  
1618 data on shRNAs downregulated after culture with Dox for 9 days when compared to the culture  
1619 without Dox. P-values were calculated using Mann Whitney U tests with a one-sided alternative  
1620 that the rank was lower. **(D)** The location of all shRNAs significantly downregulated at least 5  
1621 fold along the sequences of Venus, CD95L ORF, CD95L 3'UTR (left panel) and Venus, CD95  
1622 ORF, and CD95 3'UTR (right panel). The top half of each sub panel (blue ticks) shows the  
1623 shRNAs downregulated after infection and the bottom half (orange ticks) contains the data on  
1624 shRNAs downregulated after culture with Dox for 9 days. Significance of enrichment in the  
1625 different subpanels is shown. p-values were calculated according to statistical tests of two  
1626 proportions. Each data set was compared to the corresponding Venus distribution. Green line:  
1627 sequence that corresponds to the intracellular domain of CD95L.

1628

### 1629 **Figure 6 - figure supplement 1.**

#### 1630 **Toxicity and RNAi of individual shRNA pools.**

1631 **(A)** *Top panels:* Green object intensity over time of NB7 Venus-CD95L sensor cells infected  
1632 with the pTIP-Venus shRNA pool (*left panel*), pTIP-CD95L ORF shRNA pool (*center panel*), or  
1633 pTIP-CD95L 3'UTR shRNA pool (*right panel*) with or without Dox treatment. *Bottom panels:*  
1634 Green object intensity over time of NB7 Venus-CD95 sensor cells infected with the pTIP-Venus  
1635 shRNA pool (*left panel*), pTIP-CD95 ORF shRNA pool (*center panel*), or pTIP-CD95 3'UTR  
1636 shRNA pool (*right panel*) with or without Dox treatment. Values were calculated from samples  
1637 done in quadruplicates shown as mean  $\pm$  SE. **(B)** Percent confluence over time of parental NB7  
1638 cells infected with the pTIP-Venus shRNA pool (*top left panel*), pTIP-CD95L ORF shRNA pool  
1639 (*top center panel*), pTIP-CD95L 3'UTR shRNA pool (*top right panel*), pTIP-CD95 ORF-shRNA  
1640 pool (*bottom center panel*), and pTIP-CD95 3'UTR shRNA pool (*bottom right panel*) with or  
1641 without Dox treatment. Values were calculated from samples done in triplicate shown as mean  $\pm$   
1642 SE. P-values were calculated using two-way ANOVA with a factor for Dox treatment and a  
1643 factor for time. Similar data were obtained when either HCT116 or 293T cells were treated with  
1644 each of the five shRNA pools (data not shown).

1645

### 1646 **Figure 6 - figure supplement 2.**

#### 1647 **Fold change in shRNA representation after infection of NB7 cells and after treatment with** 1648 **Dox.**

1649 **(A)** Change in green fluorescence (top panels) and percent cell confluence (bottom panels) over  
1650 time of NB7 cells expressing either Venus-CD95 (left panels) or Venus-CD95L (right panels).  
1651 Cells were infected with the Tet-inducible pTIP-shR6 virus, selected for two days with  
1652 puromycin and then subjected to an analysis in the IncuCyte Zoom. No Dox was added. Two  
1653 other inducible constructs (pTIP-shL1 and pTIP-shL3) were tested in the same way and no  
1654 evidence of leakiness was observed (data not shown), supporting the finding in the shRNA  
1655 screen that certain shRNA constructs display leakiness while others do not. Values were  
1656 calculated from samples done in triplicate shown as mean  $\pm$  SE. **(B)** Scatterplot showing the fold  
1657 change of shRNAs after infection of cells and culture for 9 days without Dox when compared to  
1658 the composition of the shRNA plasmid library (X axis) and the fold change of shRNAs after  
1659 culture with Dox for 9 days when compared to the culture without Dox (Y axis). The red dots are  
1660 the shRNAs that were significantly downregulated at least 5 fold. The number of shRNAs  
1661 labeled in red in each quartile is given in blue. Two of the shRNAs tested before are labeled in  
1662 green.

1663

### 1664 **Figure 7.**

1665 **In silico prediction of DISE activity tracks with experimental determined toxicity of**  
1666 **shRNAs.**

1667 (A) *Left*: Schematic showing the preferential targeting of seed matches present in the 3'UTRs  
1668 (red marks) of survival genes by toxic si/shRNAs. *Right*: The toxicity index (TI) is the  
1669 normalized ratio of the number of 6mer or 8mer seed matches present in a list of survival genes  
1670 versus a list of nonsurvival genes. (B) Fold downregulation versus ranked (8mer seed matched  
1671 based) Toxicity Index for shRNAs of the Venus/CD95L pool (*left three panels*) and the  
1672 Venus/CD95 pool (*right three panels*). Orange and blue tick marks indicate the same as in  
1673 *Figure 6D*. To test if higher TI is enriched in shRNAs that were highly downregulated, p-values  
1674 were calculated based on permuted datasets using Mann-Whitney U tests. The ranking of TI  
1675 was randomly shuffled 10,000 times and the W statistic from our dataset was compared to the  
1676 distribution of the W statistic of the permuted datasets. (C, D) Plot of fold downregulation of  
1677 toxic shRNAs derived from CD95L ORF of the toxicity screens -Dox (left) or +Dox (center)  
1678 versus GC content the 6mer seed in each shRNA. (E) Plot of the log(TI) of all 4092 possible  
1679 6mers versus GC content of the seeds. Pearson correlation coefficient and significance (p values)  
1680 are given.

1681  
1682 **Figure 7 - figure supplement 1.**

1683 **DISE does not just target all highly expressed genes.**

1684 (A) Correlation between 850 survival genes (genes identified as critical survival genes in two  
1685 genome-wide lethality screens (Blomen et al., 2015; Wang et al., 2015) and expressed at least at  
1686 100 reads in all of the 16 control RNA Seq samples in this study) and 850 expression matched  
1687 nonsurvival genes (genes not identified as critical survival genes in two genome-wide lethality  
1688 screens (Blomen et al., 2015; Wang et al., 2015) and expressed at least at 100 reads in all of the  
1689 16 control RNA Seq samples in this study). (B) Reanalysis of the CD95L ORF data in *Figure 7B*  
1690 using two alternative ways to calculate the toxicity index (TI). *Left*: the analysis shown in *Figure*  
1691 *7B* with the data ranked using the original TI (using all known 3'UTRs for each gene group).  
1692 *Center*: analysis with the data ranked using the original TI but based on only the longest 3'UTR  
1693 for each gene. *Right*: analysis with the data ranked using the new TI based on expression  
1694 matched SGs and nonSGs identified in A and using the longest 3'UTR for each gene. To test if  
1695 higher TI is enriched in shRNAs that were highly downregulated, p-values were calculated based  
1696 on permuted datasets using Mann-Whitney U tests.

1697  
1698 **Supplementary Files:**

1699  
1700 **Supplementary File 1: Results of the RNA-Seq analysis used to generate *Figure 4B*.**

1701  
1702 **Supplementary File 2: Gene lists used in this work.**

1703  
1704 **Supplementary File 3: shRNA screen data.**

1705  
1706 **Supplementary File 4: The 6mer and 8mer toxicity index.**

1707  
1708 **Supplementary File 5: Correlation between experimental shRNA toxicity and TI.**

1709

1710 **References**

- 1711
- 1712 Algeciras-Schimnich, A., Pietras, E. M., Barnhart, B. C., Legembre, P., Vijayan, S., Holbeck, S.  
1713 L., & Peter, M. E. (2003). Two CD95 tumor classes with different sensitivities to  
1714 antitumor drugs. *Proc Natl Acad Sci U S A*, *100*(20), 11445-11450.
- 1715 Bae, K., Park, K. E., Han, J., Kim, J., Kim, K., & Yoon, K. A. (2016). Mitotic cell death caused  
1716 by follistatin-like 1 inhibition is associated with up-regulated Bim by inactivated Erk1/2  
1717 in human lung cancer cells. *Oncotarget*, *7*(14), 18076-18084.  
1718 doi:10.18632/oncotarget.6729
- 1719 Barnhart, B. C., Legembre, P., Pietras, E., Bubici, C., Franzoso, G., & Peter, M. E. (2004). CD95  
1720 ligand induces motility and invasiveness of apoptosis-resistant tumor cells. *EMBO J*,  
1721 *23*(15), 3175-3185.
- 1722 Baumgarten, P., Harter, P. N., Tonjes, M., Capper, D., Blank, A. E., Sahm, F., . . . Mittelbronn,  
1723 M. (2014). Loss of FUBP1 expression in gliomas predicts FUBP1 mutation and is  
1724 associated with oligodendroglial differentiation, IDH1 mutation and 1p/19q loss of  
1725 heterozygosity. *Neuropathol Appl Neurobiol*, *40*(2), 205-216. doi:10.1111/nan.12088
- 1726 Bernstein, E., Caudy, A. A., Hammond, S. M., & Hannon, G. J. (2001). Role for a bidentate  
1727 ribonuclease in the initiation step of RNA interference. *Nature*, *409*(6818), 363-366.  
1728 doi:10.1038/35053110
- 1729 Birmingham, A., Anderson, E. M., Reynolds, A., Ilsley-Tyree, D., Leake, D., Fedorov, Y., . . .  
1730 Khvorova, A. (2006). 3' UTR seed matches, but not overall identity, are associated with  
1731 RNAi off-targets. *Nat Methods*, *3*(3), 199-204. doi:10.1038/nmeth854
- 1732 Blomen, V. A., Majek, P., Jae, L. T., Bigenzahn, J. W., Nieuwenhuis, J., Staring, J., . . .  
1733 Brummelkamp, T. R. (2015). Gene essentiality and synthetic lethality in haploid human  
1734 cells. *Science*, *350*(6264), 1092-1096. doi:10.1126/science.aac7557
- 1735 Bramsen, J. B., Laursen, M. B., Nielsen, A. F., Hansen, T. B., Bus, C., Langkjaer, N., . . . Kjems,  
1736 J. (2009). A large-scale chemical modification screen identifies design rules to generate  
1737 siRNAs with high activity, high stability and low toxicity. *Nucleic Acids Res*, *37*(9),  
1738 2867-2881. doi:10.1093/nar/gkp106
- 1739 Ceppi, P., Hadji, A., Kohlhapp, F., Pattanayak, A., Hau, A., Xia, L., . . . Peter, M. E. (2014).  
1740 CD95 and CD95L promote and protect cancer stem cells. *Nature Commun*, *5*, 5238.
- 1741 Cerami, E., Gao, J., Dogrusoz, U., Gross, B. E., Sumer, S. O., Aksoy, B. A., . . . Schultz, N.  
1742 (2012). The cBio cancer genomics portal: an open platform for exploring  
1743 multidimensional cancer genomics data. *Cancer Discov*, *2*(5), 401-404.  
1744 doi:10.1158/2159-8290.CD-12-0095
- 1745 Chan, K. T., Choi, M. Y., Lai, K. K., Tan, W., Tung, L. N., Lam, H. Y., . . . Law, S. (2014).  
1746 Overexpression of transferrin receptor CD71 and its tumorigenic properties in esophageal  
1747 squamous cell carcinoma. *Oncol Rep*, *31*(3), 1296-1304. doi:10.3892/or.2014.2981
- 1748 Chen, L., Park, S. M., Tumanov, A. V., Hau, A., Sawada, K., Feig, C., . . . Peter, M. E. (2010).  
1749 CD95 promotes tumour growth. *Nature*, *465*(7297), 492-496.
- 1750 Chiu, Y. L., & Rana, T. M. (2003). siRNA function in RNAi: a chemical modification analysis.  
1751 *RNA*, *9*(9), 1034-1048.
- 1752 Cowley, G. S., Weir, B. A., Vazquez, F., Tamayo, P., Scott, J. A., Rusin, S., . . . Hahn, W. C.  
1753 (2014). Parallel genome-scale loss of function screens in 216 cancer cell lines for the  
1754 identification of context-specific genetic dependencies. *Sci Data*, *1*, 140035.  
1755 doi:10.1038/sdata.2014.35

- 1756 Dow, L. E., Premsrirut, P. K., Zuber, J., Fellmann, C., McJunkin, K., Miething, C., . . . Lowe,  
1757 S. W. (2012). A pipeline for the generation of shRNA transgenic mice. *Nat Protoc*, *7*(2),  
1758 374-393. doi:10.1038/nprot.2011.446
- 1759 Drachsler, M., Kleber, S., Mateos, A., Volk, K., Mohr, N., Chen, S., . . . Martin-Villalba, A.  
1760 (2016). CD95 maintains stem cell-like and non-classical EMT programs in primary  
1761 human glioblastoma cells. *Cell death & disease*, *7*, e2209. doi:10.1038/cddis.2016.102
- 1762 Fedorov, Y., Anderson, E. M., Birmingham, A., Reynolds, A., Karpilow, J., Robinson, K., . . .  
1763 Khvorova, A. (2006). Off-target effects by siRNA can induce toxic phenotype. *RNA*,  
1764 *12*(7), 1188-1196. doi:10.1261/rna.28106
- 1765 Friesen, C., Fulda, S., & Debatin, K. M. (1999). Cytotoxic drugs and the CD95 pathway.  
1766 *Leukemia*, *13*(11), 1854-1858.
- 1767 Gao, J., Aksoy, B. A., Dogrusoz, U., Dresdner, G., Gross, B., Sumer, S. O., . . . Schultz, N.  
1768 (2013). Integrative analysis of complex cancer genomics and clinical profiles using the  
1769 cBioPortal. *Science signaling*, *6*(269), p11. doi:10.1126/scisignal.2004088
- 1770 Grimm, D., Streetz, K. L., Jopling, C. L., Storm, T. A., Pandey, K., Davis, C. R., . . . Kay, M. A.  
1771 (2006). Fatality in mice due to oversaturation of cellular microRNA/short hairpin RNA  
1772 pathways. *Nature*, *441*(7092), 537-541. doi:10.1038/nature04791
- 1773 Gu, S., Jin, L., Zhang, Y., Huang, Y., Zhang, F., Valdmanis, P. N., & Kay, M. A. (2012). The  
1774 loop position of shRNAs and pre-miRNAs is critical for the accuracy of dicer processing  
1775 in vivo. *Cell*, *151*(4), 900-911. doi:10.1016/j.cell.2012.09.042
- 1776 Gu, S., Zhang, Y., Jin, L., Huang, Y., Zhang, F., Bassik, M. C., . . . Kay, M. A. (2014). Weak  
1777 base pairing in both seed and 3' regions reduces RNAi off-targets and enhances si/shRNA  
1778 designs. *Nucleic Acids Res*, *42*(19), 12169-12176. doi:10.1093/nar/gku854
- 1779 Gui, S., Sang, X., Zheng, L., Ze, Y., Zhao, X., Sheng, L., . . . Tang, M. (2013). Intra-gastric  
1780 exposure to titanium dioxide nanoparticles induced nephrotoxicity in mice, assessed by  
1781 physiological and gene expression modifications. *Part Fibre Toxicol*, *10*, 4.  
1782 doi:10.1186/1743-8977-10-4
- 1783 Guo, H., Ingolia, N. T., Weissman, J. S., & Bartel, D. P. (2010). Mammalian microRNAs  
1784 predominantly act to decrease target mRNA levels. *Nature*, *466*(7308), 835-840.
- 1785 Ha, M., & Kim, V. N. (2014). Regulation of microRNA biogenesis. *Nat Rev Mol Cell Biol*,  
1786 *15*(8), 509-524. doi:10.1038/nrm3838
- 1787 Hadji, A., Ceppi, P., Murmann, A. E., Brockway, S., Pattanayak, A., Bhinder, B., . . . Peter, M.  
1788 E. (2014). Death induced by CD95 or CD95 ligand elimination. *Cell Reports*, *10*, 208-  
1789 222.
- 1790 Hart, T., Brown, K. R., Sircoulomb, F., Rottapel, R., & Moffat, J. (2014). Measuring error rates  
1791 in genomic perturbation screens: gold standards for human functional genomics. *Mol Syst*  
1792 *Biol*, *10*, 733. doi:10.15252/msb.20145216
- 1793 Hart, T., Chandrashekhar, M., Aregger, M., Steinhart, Z., Brown, K. R., MacLeod, G., . . .  
1794 Moffat, J. (2015). High-Resolution CRISPR Screens Reveal Fitness Genes and  
1795 Genotype-Specific Cancer Liabilities. *Cell*, *163*(6), 1515-1526.  
1796 doi:10.1016/j.cell.2015.11.015
- 1797 Hou, F., Chu, C. W., Kong, X., Yokomori, K., & Zou, H. (2007). The acetyltransferase activity  
1798 of San stabilizes the mitotic cohesin at the centromeres in a shugoshin-independent  
1799 manner. *J Cell Biol*, *177*(4), 587-597. doi:10.1083/jcb.200701043
- 1800 Jackson, A. L., Burchard, J., Schelter, J., Chau, B. N., Cleary, M., Lim, L., & Linsley, P. S.  
1801 (2006). Widespread siRNA "off-target" transcript silencing mediated by seed region  
1802 sequence complementarity. *RNA*, *12*(7), 1179-1187. doi:10.1261/rna.25706

- 1803 Jang, M., Park, B. C., Kang, S., Chi, S. W., Cho, S., Chung, S. J., . . . Park, S. G. (2009). Far  
1804 upstream element-binding protein-1, a novel caspase substrate, acts as a cross-talker  
1805 between apoptosis and the c-myc oncogene. *Oncogene*, 28(12), 1529-1536.  
1806 doi:10.1038/onc.2009.11
- 1807 Jinek, M., East, A., Cheng, A., Lin, S., Ma, E., & Doudna, J. (2013). RNA-programmed genome  
1808 editing in human cells. *Elife*, 2, e00471. doi:10.7554/eLife.00471
- 1809 Khan, A. A., Betel, D., Miller, M. L., Sander, C., Leslie, C. S., & Marks, D. S. (2009).  
1810 Transfection of small RNAs globally perturbs gene regulation by endogenous  
1811 microRNAs. *Nat Biotechnol*, 27(6), 549-555.
- 1812 Kim, D. H., Behlke, M. A., Rose, S. D., Chang, M. S., Choi, S., & Rossi, J. J. (2005). Synthetic  
1813 dsRNA Dicer substrates enhance RNAi potency and efficacy. *Nat Biotechnol*, 23(2), 222-  
1814 226. doi:10.1038/nbt1051
- 1815 Kim, Y. K., Kim, B., & Kim, V. N. (2016). Re-evaluation of the roles of DROSHA, Exportin 5,  
1816 and DICER in microRNA biogenesis. *Proc Natl Acad Sci U S A*, 113(13), E1881-1889.  
1817 doi:10.1073/pnas.1602532113
- 1818 Kleber, S., Sancho-Martinez, I., Wiestler, B., Beisel, A., Gieffers, C., Hill, O., . . . Martin-  
1819 Villalba, A. (2008). Yes and PI3K Bind CD95 to Signal Invasion of Glioblastoma.  
1820 *Cancer Cell*, 13(3), 235-248.
- 1821 Krammer, P. H. (2000). CD95's deadly mission in the immune system. *Nature*, 407(6805), 789-  
1822 795.
- 1823 Krol, J., Loedige, I., & Filipowicz, W. (2010). The widespread regulation of microRNA  
1824 biogenesis, function and decay. *Nat Rev Genet*, 11(9), 597-610.
- 1825 Lin, X., Ruan, X., Anderson, M. G., McDowell, J. A., Kroeger, P. E., Fesik, S. W., & Shen, Y.  
1826 (2005). siRNA-mediated off-target gene silencing triggered by a 7 nt complementation.  
1827 *Nucleic Acids Res*, 33(14), 4527-4535. doi:10.1093/nar/gki762
- 1828 Love, M. I., Huber, W., & Anders, S. (2014). Moderated estimation of fold change and  
1829 dispersion for RNA-seq data with DESeq2. *Genome Biol*, 15(12), 550.  
1830 doi:10.1186/s13059-014-0550-8
- 1831 Lu, J., Getz, G., Miska, E. A., varez-Saavedra, E., Lamb, J., Peck, D., . . . Golub, T. R. (2005).  
1832 MicroRNA expression profiles classify human cancers. *Nature*, 435(7043), 834-838.
- 1833 Mali, P., Yang, L., Esvelt, K. M., Aach, J., Guell, M., DiCarlo, J. E., . . . Church, G. M. (2013).  
1834 RNA-guided human genome engineering via Cas9. *Science*, 339(6121), 823-826.  
1835 doi:10.1126/science.1232033
- 1836 Marques, J. T., & Williams, B. R. (2005). Activation of the mammalian immune system by  
1837 siRNAs. *Nat Biotechnol*, 23(11), 1399-1405. doi:10.1038/nbt1161
- 1838 Medina-Rivera, A., Defrance, M., Sand, O., Herrmann, C., Castro-Mondragon, J. A., Delerce, J.,  
1839 . . . van Helden, J. (2015). RSAT 2015: Regulatory Sequence Analysis Tools. *Nucleic  
1840 Acids Res*, 43(W1), W50-56. doi:10.1093/nar/gkv362
- 1841 Mi, N., Chen, Y., Wang, S., Chen, M., Zhao, M., Yang, G., . . . Yu, L. (2015). CapZ regulates  
1842 autophagosomal membrane shaping by promoting actin assembly inside the isolation  
1843 membrane. *Nat Cell Biol*, 17(9), 1112-1123. doi:10.1038/ncb3215
- 1844 Morgens, D. W., Deans, R. M., Li, A., & Bassik, M. C. (2016). Systematic comparison of  
1845 CRISPR/Cas9 and RNAi screens for essential genes. *Nat Biotechnol*, 34(6), 634-636.  
1846 doi:10.1038/nbt.3567
- 1847 Morgulis, A., Gertz, E. M., Schaffer, A. A., & Agarwala, R. (2006). A fast and symmetric DUST  
1848 implementation to mask low-complexity DNA sequences. *J Comput Biol*, 13(5), 1028-  
1849 1040. doi:10.1089/cmb.2006.13.1028

- 1850 Murmann, A. E., McMahon, K. M., Halluck-Kangas, A., Ravindran, N., Patel, M., Law, C., . . .  
1851 . Peter, M. E. (2017). Induction of DISE in ovarian cancer cells in vivo. *BioRxive*,  
1852 <https://doi.org/10.1101/141945>.
- 1853 Parplys, A. C., Zhao, W., Sharma, N., Groesser, T., Liang, F., Maranon, D. G., . . . Wiese, C.  
1854 (2015). NUCKS1 is a novel RAD51AP1 paralog important for homologous  
1855 recombination and genome stability. *Nucleic Acids Res*, *43*(20), 9817-9834.  
1856 doi:10.1093/nar/gkv859
- 1857 Patel, M., & Peter, M. E. (2017). Identification of DISE-inducing shRNAs by monitoring  
1858 cellular responses. *BioRxive*, <https://doi.org/10.1101/186890>.
- 1859 Peter, M. E., Budd, R. C., Desbarats, J., Hedrick, S. M., Hueber, A. O., Newell, M. K., . . .  
1860 Lynch, D. H. (2007). The CD95 receptor: apoptosis revisited. *Cell*, *129*(3), 447-450.
- 1861 Petri, S., & Meister, G. (2013). siRNA design principles and off-target effects. *Methods Mol*  
1862 *Biol*, *986*, 59-71. doi:10.1007/978-1-62703-311-4\_4
- 1863 Pham, D. H., Moretti, P. A., Goodall, G. J., & Pitson, S. M. (2008). Attenuation of leakiness in  
1864 doxycycline-inducible expression via incorporation of 3' AU-rich mRNA destabilizing  
1865 elements. *Biotechniques*, *45*(2), 155-156. doi:10.2144/000112896
- 1866 Pham, D. H., Powell, J. A., Gliddon, B. L., Moretti, P. A., Tsykin, A., Van der Hoek, M., . . .  
1867 Pitson, S. M. (2014). Enhanced expression of transferrin receptor 1 contributes to  
1868 oncogenic signalling by sphingosine kinase 1. *Oncogene*, *33*(48), 5559-5568.  
1869 doi:10.1038/onc.2013.502
- 1870 Pratt, A. J., & MacRae, I. J. (2009). The RNA-induced silencing complex: a versatile gene-  
1871 silencing machine. *J Biol Chem*, *284*(27), 17897-17901. doi:10.1074/jbc.R900012200
- 1872 Qadir, A. S., Ceppi, P., Brockway, S., Law, C., Mu, L., Khodarev, N. N., . . . Peter, M. E. (2017).  
1873 CD95/Fas Increases Stemness in Cancer Cells by Inducing a STAT1-Dependent Type I  
1874 Interferon Response. *Cell Rep*, *18*(10), 2373-2386. doi:10.1016/j.celrep.2017.02.037
- 1875 Quidville, V., Alsafadi, S., Goubar, A., Commo, F., Scott, V., Pioche-Durieu, C., . . . Andre, F.  
1876 (2013). Targeting the deregulated spliceosome core machinery in cancer cells triggers  
1877 mTOR blockade and autophagy. *Cancer Res*, *73*(7), 2247-2258. doi:10.1158/0008-  
1878 5472.CAN-12-2501
- 1879 Rabenhorst, U., Thalheimer, F. B., Gerlach, K., Kijonka, M., Bohm, S., Krause, D. S., . . .  
1880 Zornig, M. (2015). Single-Stranded DNA-Binding Transcriptional Regulator FUBP1 Is  
1881 Essential for Fetal and Adult Hematopoietic Stem Cell Self-Renewal. *Cell Rep*, *11*(12),  
1882 1847-1855. doi:10.1016/j.celrep.2015.05.038
- 1883 Robbins, M. A., Li, M., Leung, I., Li, H., Boyer, D. V., Song, Y., . . . Rossi, J. J. (2006). Stable  
1884 expression of shRNAs in human CD34+ progenitor cells can avoid induction of  
1885 interferon responses to siRNAs in vitro. *Nat Biotechnol*, *24*(5), 566-571.  
1886 doi:10.1038/nbt1206
- 1887 Schoggins, J. W., Wilson, S. J., Panis, M., Murphy, M. Y., Jones, C. T., Bieniasz, P., & Rice, C.  
1888 M. (2011). A diverse range of gene products are effectors of the type I interferon antiviral  
1889 response. *Nature*, *472*(7344), 481-485. doi:10.1038/nature09907
- 1890 Shao, D. D., Tsherniak, A., Gopal, S., Weir, B. A., Tamayo, P., Stransky, N., . . . Mesirov, J. P.  
1891 (2013). ATARiS: computational quantification of gene suppression phenotypes from  
1892 multisample RNAi screens. *Genome Res*, *23*(4), 665-678. doi:10.1101/gr.143586.112
- 1893 Siomi, H., & Siomi, M. C. (2009). On the road to reading the RNA-interference code. *Nature*,  
1894 *457*(7228), 396-404. doi:10.1038/nature07754
- 1895 Stark, A., Brennecke, J., Bushati, N., Russell, R. B., & Cohen, S. M. (2005). Animal  
1896 MicroRNAs confer robustness to gene expression and have a significant impact on  
1897 3'UTR evolution. *Cell*, *123*(6), 1133-1146. doi:10.1016/j.cell.2005.11.023



- 1898 Sun, D., Zhou, M., Kowolik, C. M., Trisal, V., Huang, Q., Kernstine, K. H., . . . Shen, B.  
1899 (2011). Differential expression patterns of capping protein, protein phosphatase 1, and  
1900 casein kinase 1 may serve as diagnostic markers for malignant melanoma. *Melanoma*  
1901 *Res*, 21(4), 335-343. doi:10.1097/CMR.0b013e328346b715
- 1902 Teitz, T., Wei, T., Valentine, M. B., Vanin, E. F., Grenet, J., Valentine, V. A., . . . Kidd, V. J.  
1903 (2000). Caspase 8 is deleted or silenced preferentially in childhood neuroblastomas with  
1904 amplification of MYCN. *Nat Med*, 6(5), 529-535.
- 1905 Ting, A. H., Suzuki, H., Cope, L., Schuebel, K. E., Lee, B. H., Toyota, M., . . . Baylin, S. B.  
1906 (2008). A requirement for DICER to maintain full promoter CpG island  
1907 hypermethylation in human cancer cells. *Cancer Res*, 68(8), 2570-2575.  
1908 doi:10.1158/0008-5472.CAN-07-6405
- 1909 Ui-Tei, K., Naito, Y., Takahashi, F., Haraguchi, T., Ohki-Hamazaki, H., Juni, A., . . . Saigo, K.  
1910 (2004). Guidelines for the selection of highly effective siRNA sequences for mammalian  
1911 and chick RNA interference. *Nucleic Acids Res*, 32(3), 936-948. doi:10.1093/nar/gkh247
- 1912 van Dongen, S., Abreu-Goodger, C., & Enright, A. J. (2008). Detecting microRNA binding and  
1913 siRNA off-target effects from expression data. *Nat Methods*, 5(12), 1023-1025.  
1914 doi:10.1038/nmeth.1267
- 1915 Wang, T., Birsoy, K., Hughes, N. W., Krupczak, K. M., Post, Y., Wei, J. J., . . . Sabatini, D. M.  
1916 (2015). Identification and characterization of essential genes in the human genome.  
1917 *Science*, 350(6264), 1096-1101. doi:10.1126/science.aac7041
- 1918 Watanabe, C., Cuellar, T. L., & Haley, B. (2016). Quantitative evaluation of first, second, and  
1919 third generation hairpin systems reveals the limit of mammalian vector-based RNAi. *RNA*  
1920 *Biol*, 13(1), 25-33. doi:10.1080/15476286.2015.1128062
- 1921 Wazir, U., Jiang, W. G., Sharma, A. K., & Mokbel, K. (2013). Guanine nucleotide binding  
1922 protein beta 1: a novel transduction protein with a possible role in human breast cancer.  
1923 *Cancer Genomics Proteomics*, 10(2), 69-73.
- 1924 Yoo, J. K., Choi, S. J., & Kim, J. K. (2013). Expression profiles of subtracted mRNAs during  
1925 cellular senescence in human mesenchymal stem cells derived from bone marrow. *Exp*  
1926 *Gerontol*, 48(5), 464-471. doi:10.1016/j.exger.2013.02.022
- 1927 Zamore, P. D., Tuschl, T., Sharp, P. A., & Bartel, D. P. (2000). RNAi: double-stranded RNA  
1928 directs the ATP-dependent cleavage of mRNA at 21 to 23 nucleotide intervals. *Cell*,  
1929 101(1), 25-33. doi:10.1016/S0092-8674(00)80620-0
- 1930 Zare, H., Khodursky, A., & Sartorelli, V. (2014). An evolutionarily biased distribution of  
1931 miRNA sites toward regulatory genes with high promoter-driven intrinsic transcriptional  
1932 noise. *BMC Evol Biol*, 14, 74. doi:10.1186/1471-2148-14-74
- 1933 Zhang, Y., Wang, Y., Wei, Y., Wu, J., Zhang, P., Shen, S., . . . Yu, L. (2016). Molecular  
1934 chaperone CCT3 supports proper mitotic progression and cell proliferation in  
1935 hepatocellular carcinoma cells. *Cancer Lett*, 372(1), 101-109.  
1936 doi:10.1016/j.canlet.2015.12.029
- 1937

Figure 1

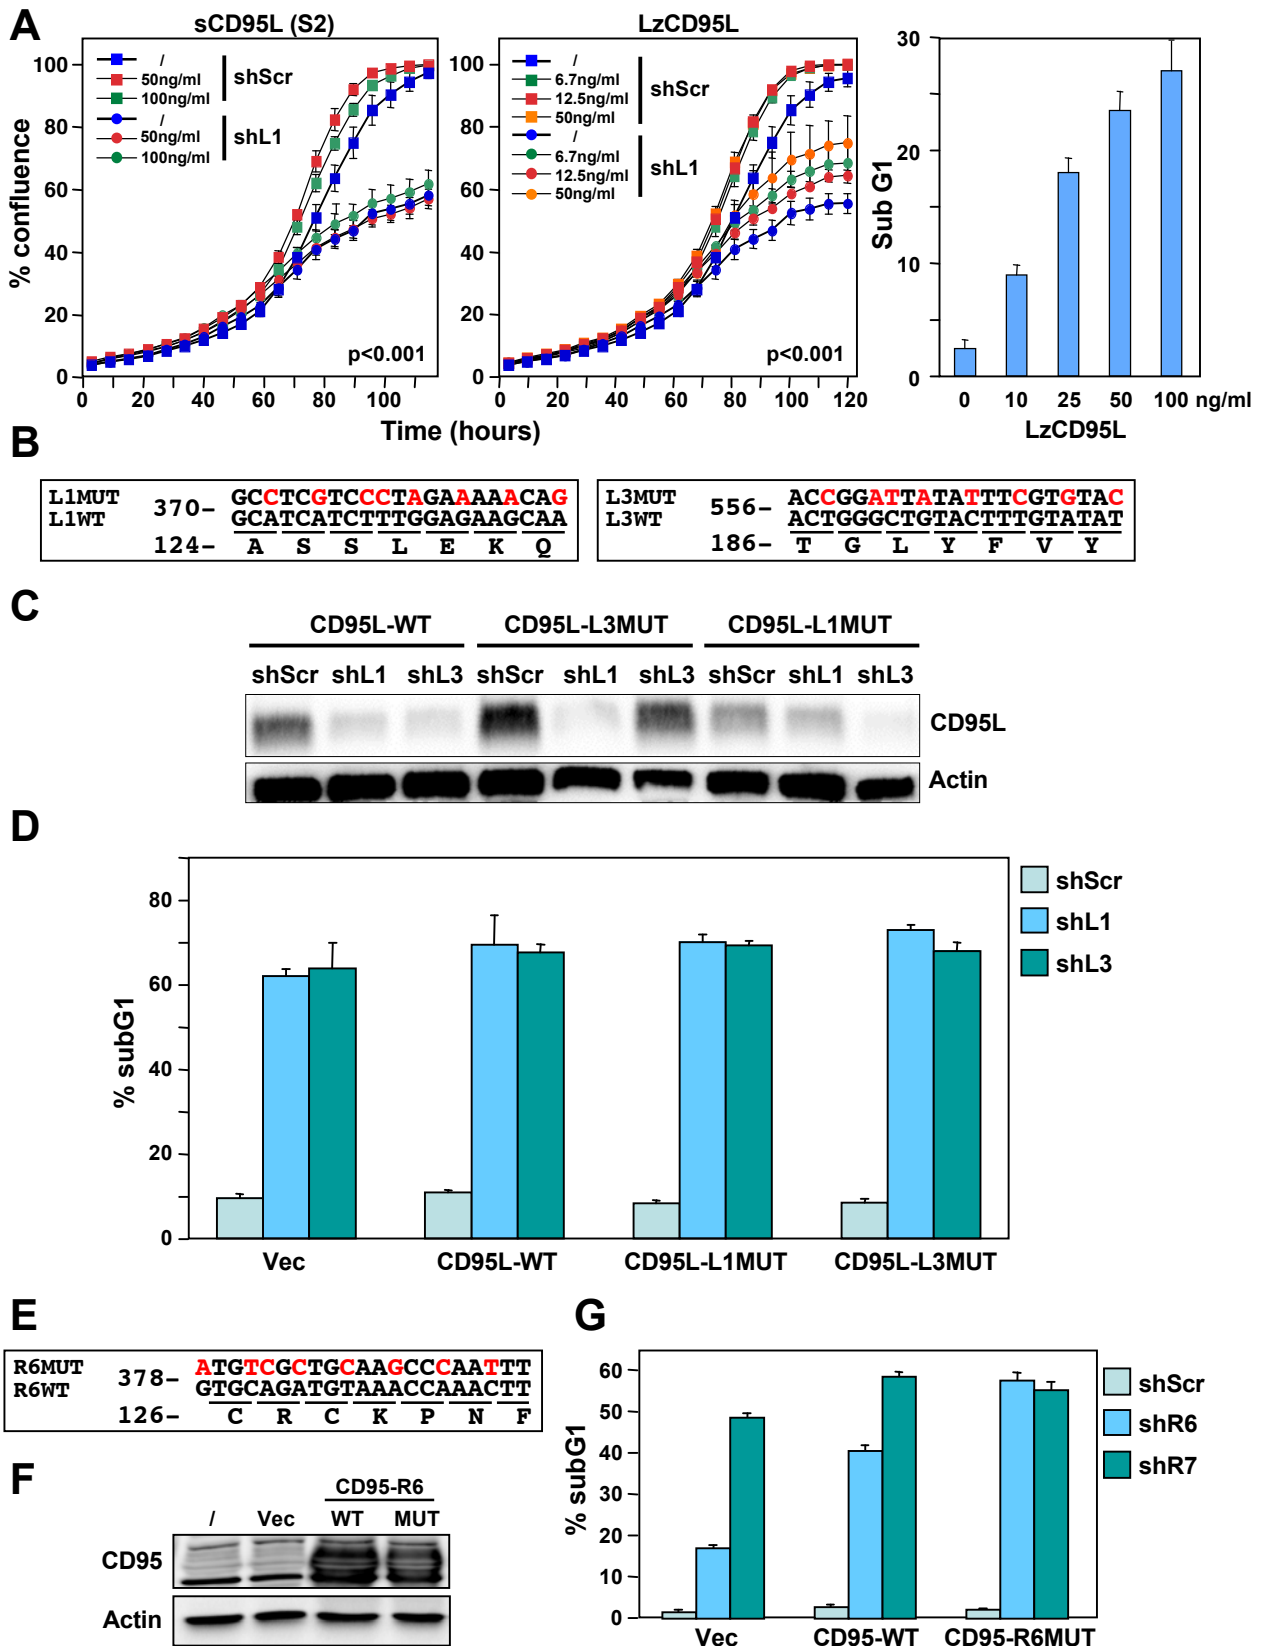

Figure 1 - figure supplement 1

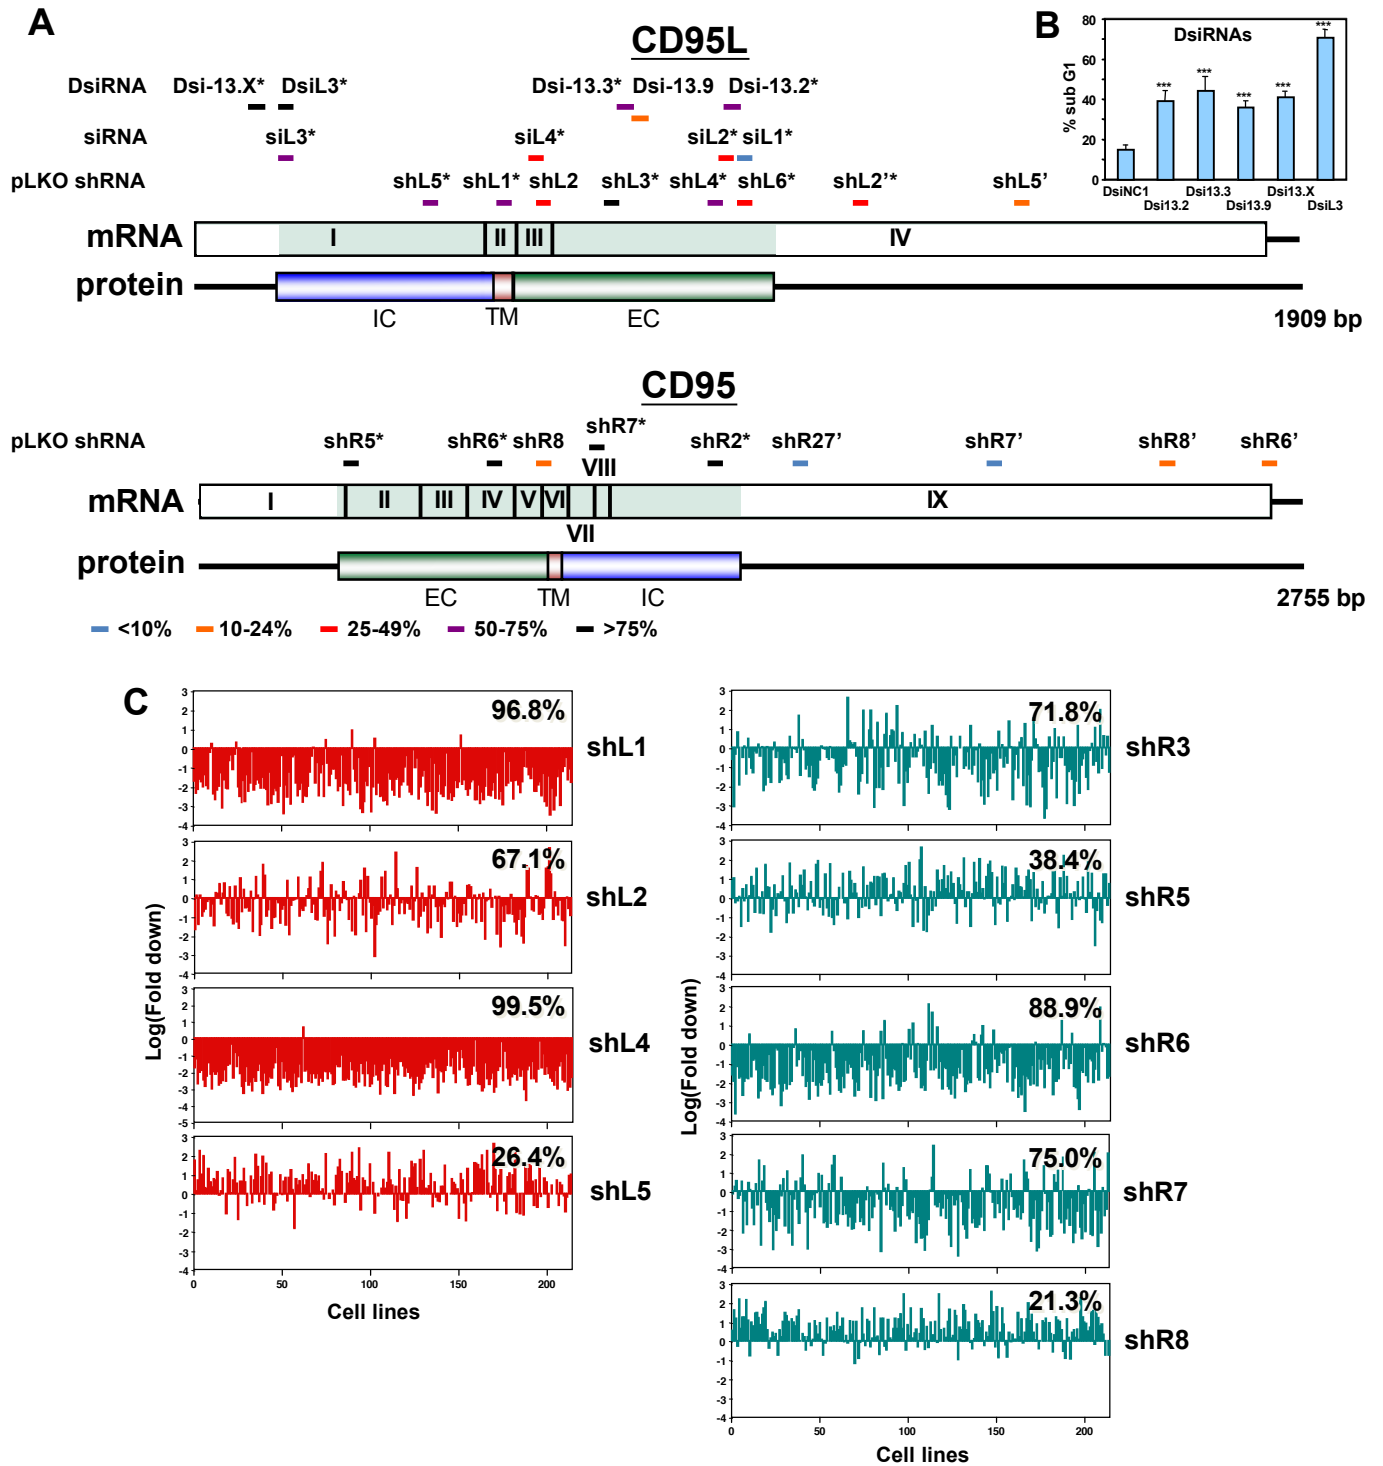

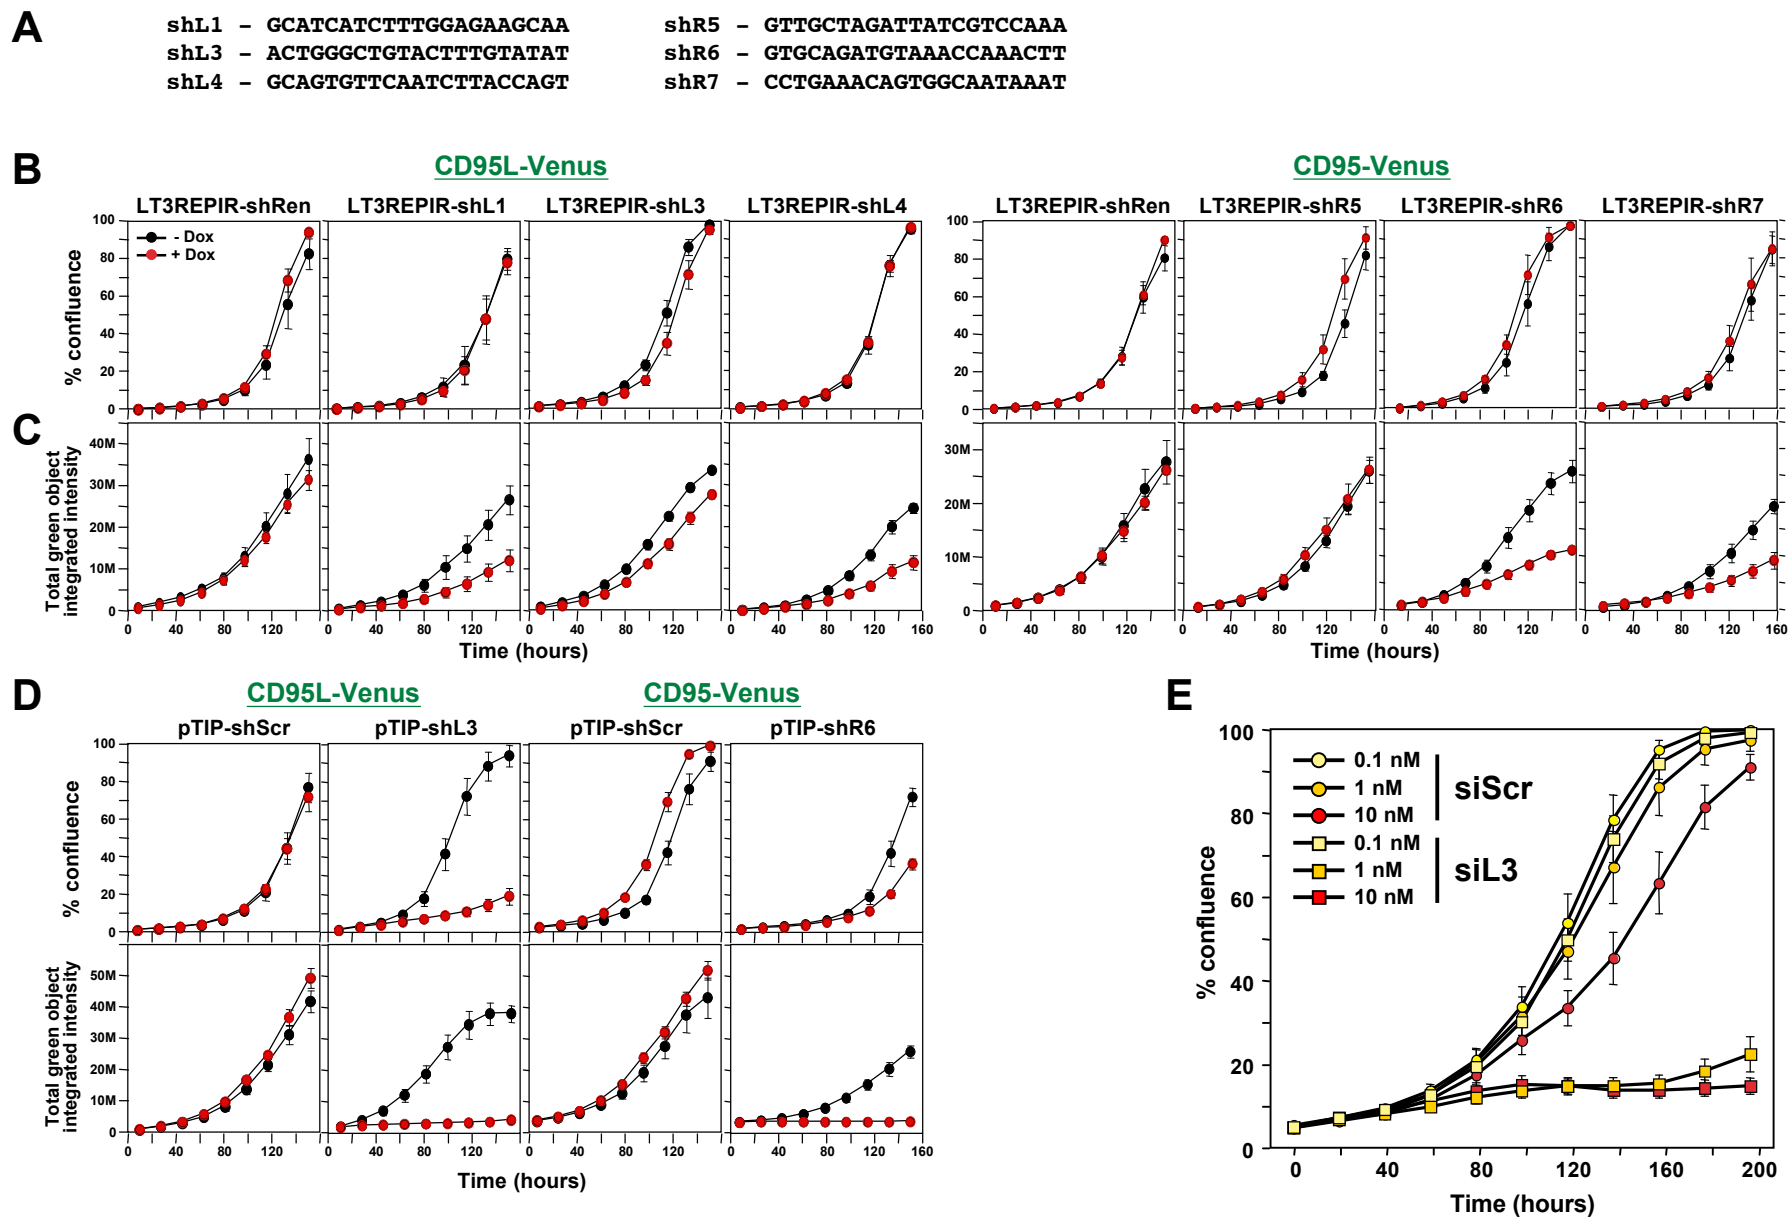

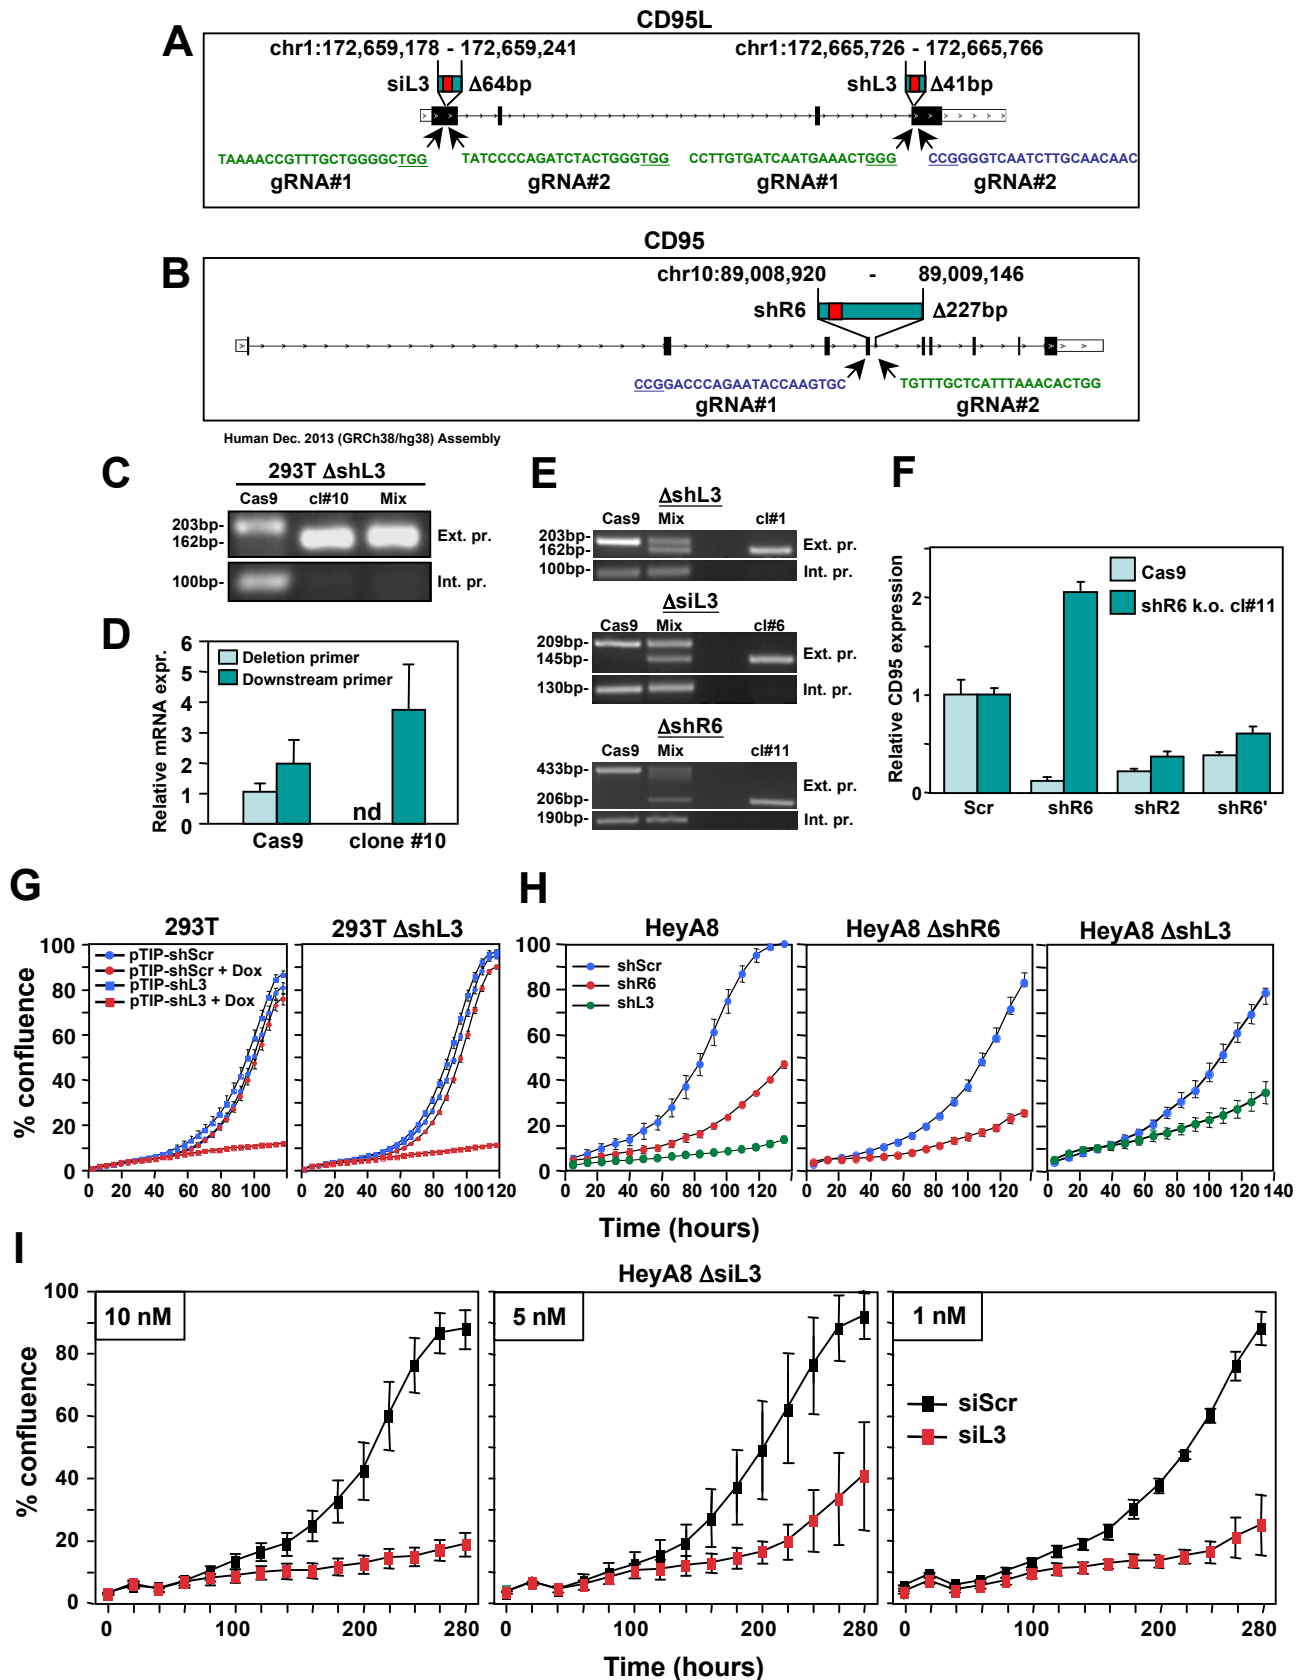

Figure 2 - figure supplement 1

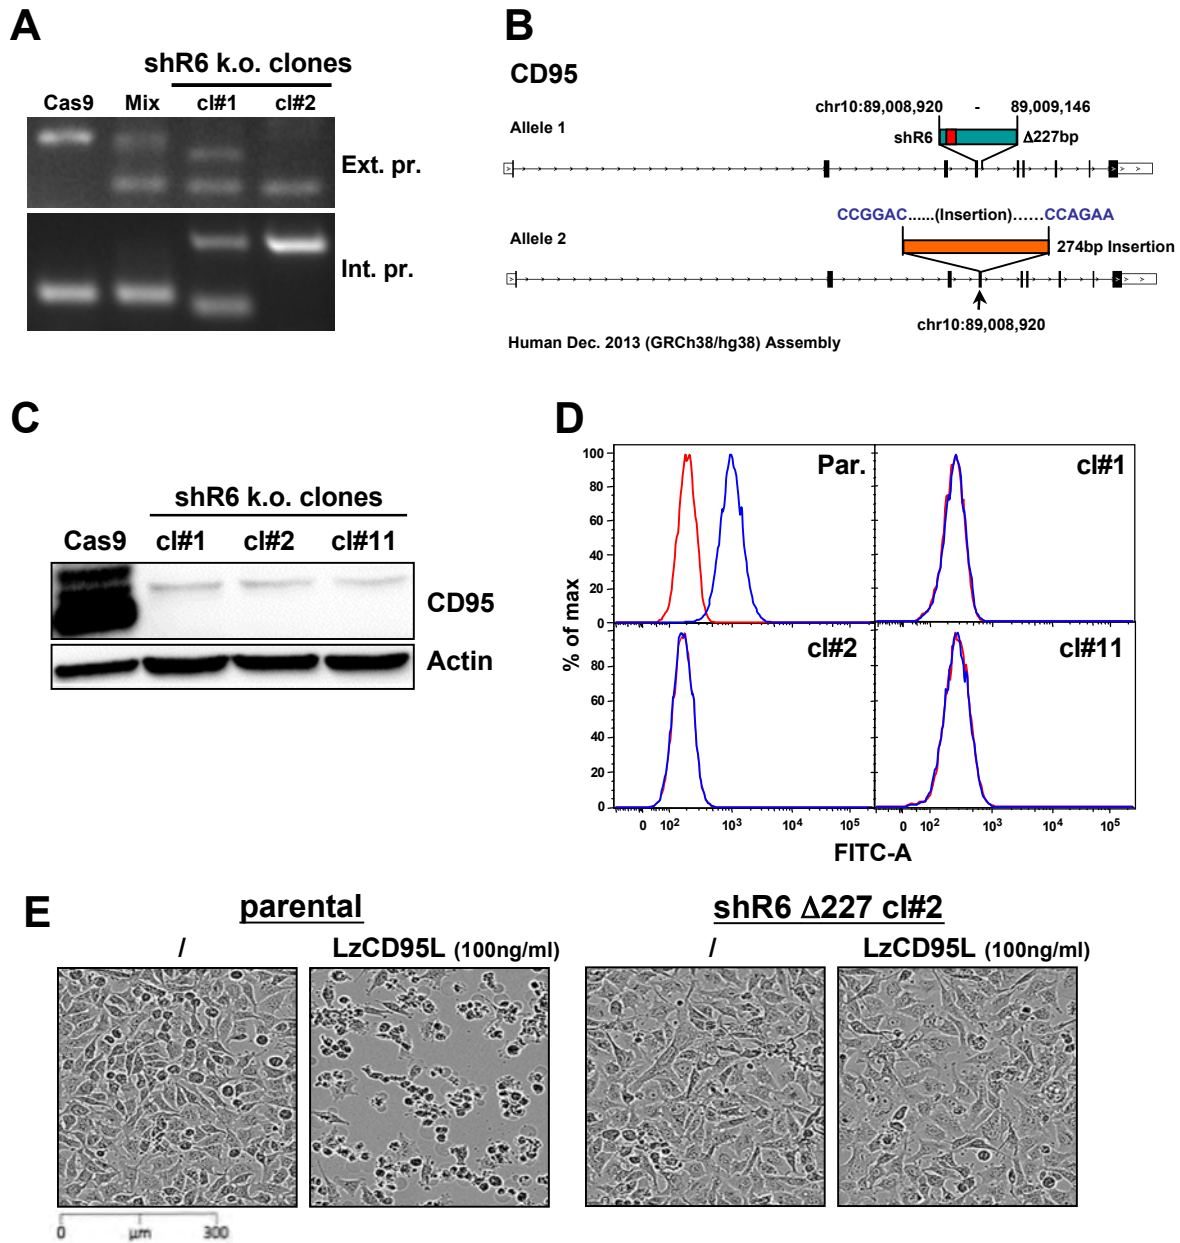

Figure 3

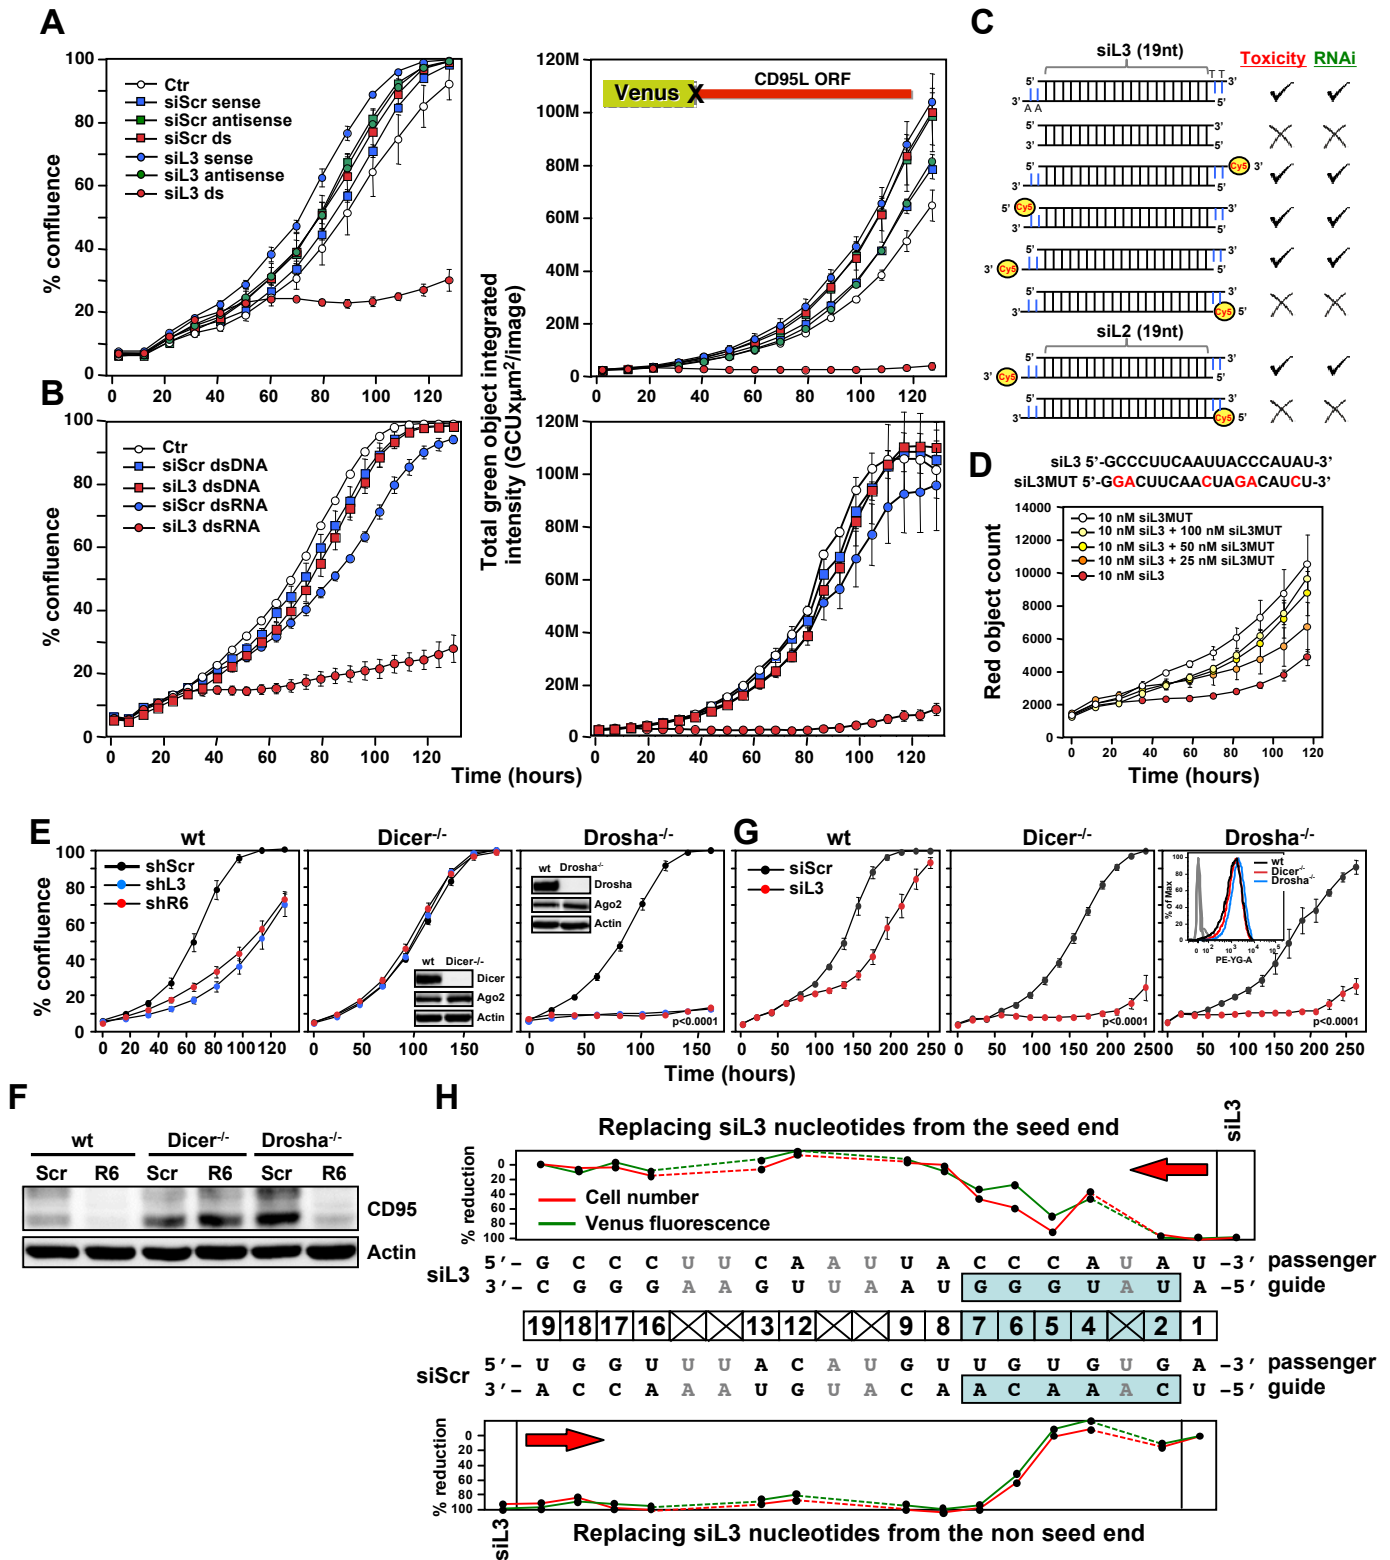

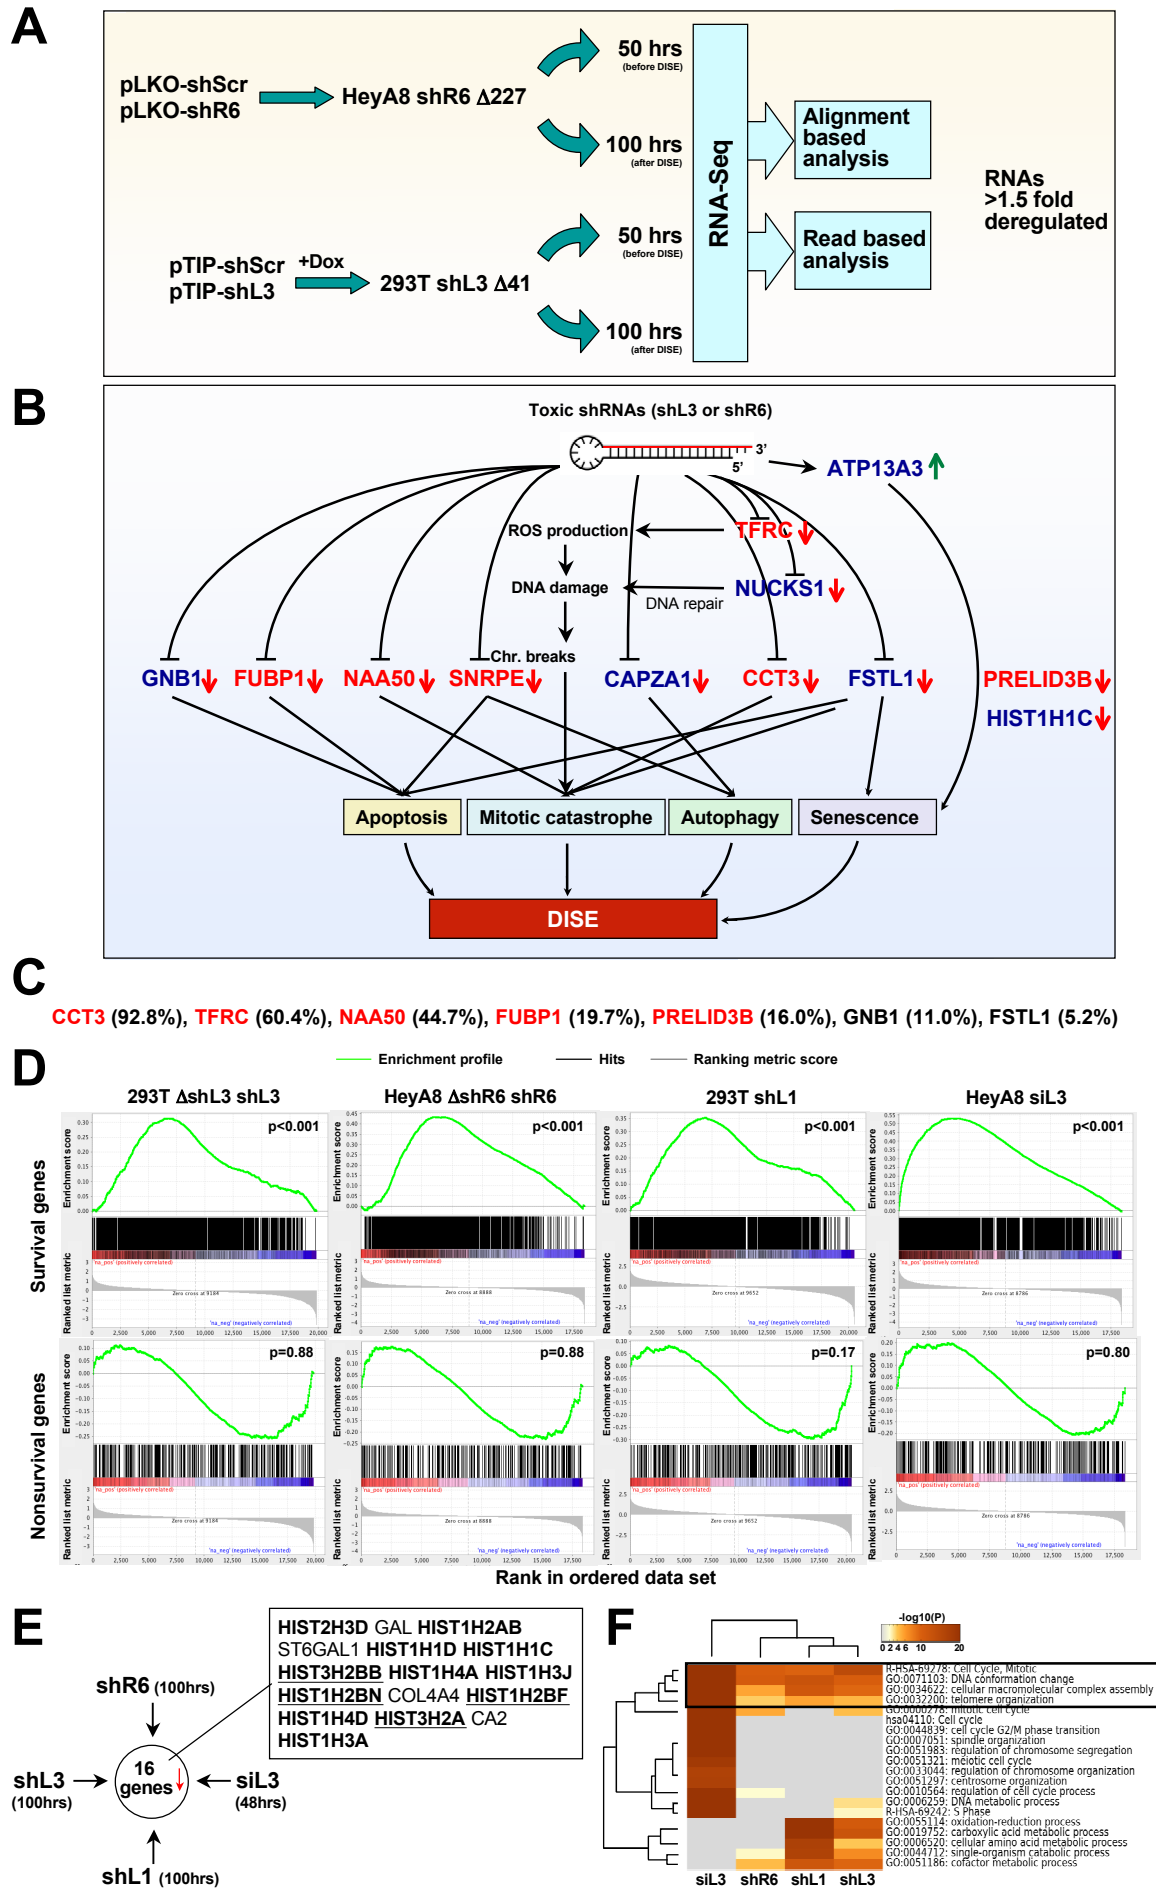



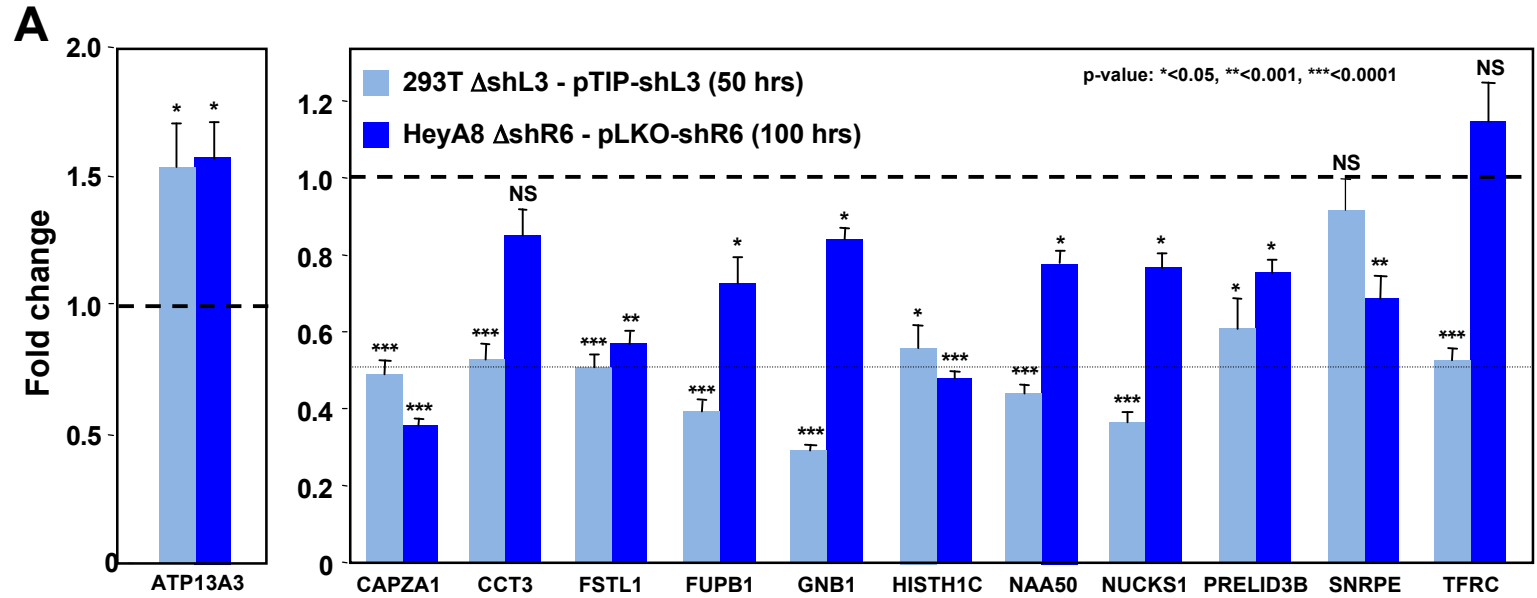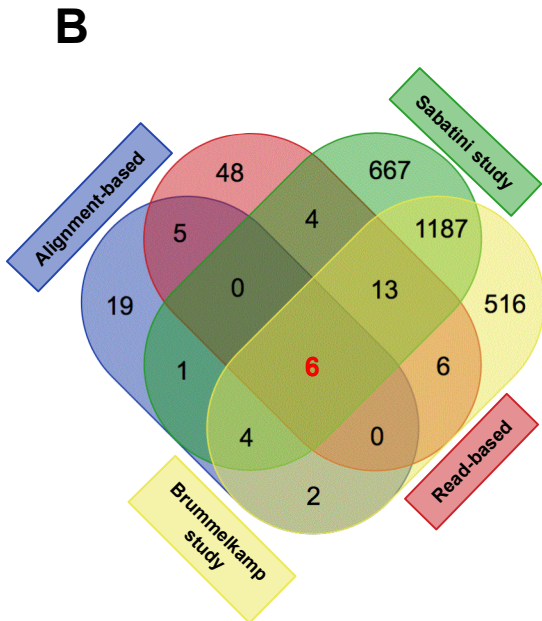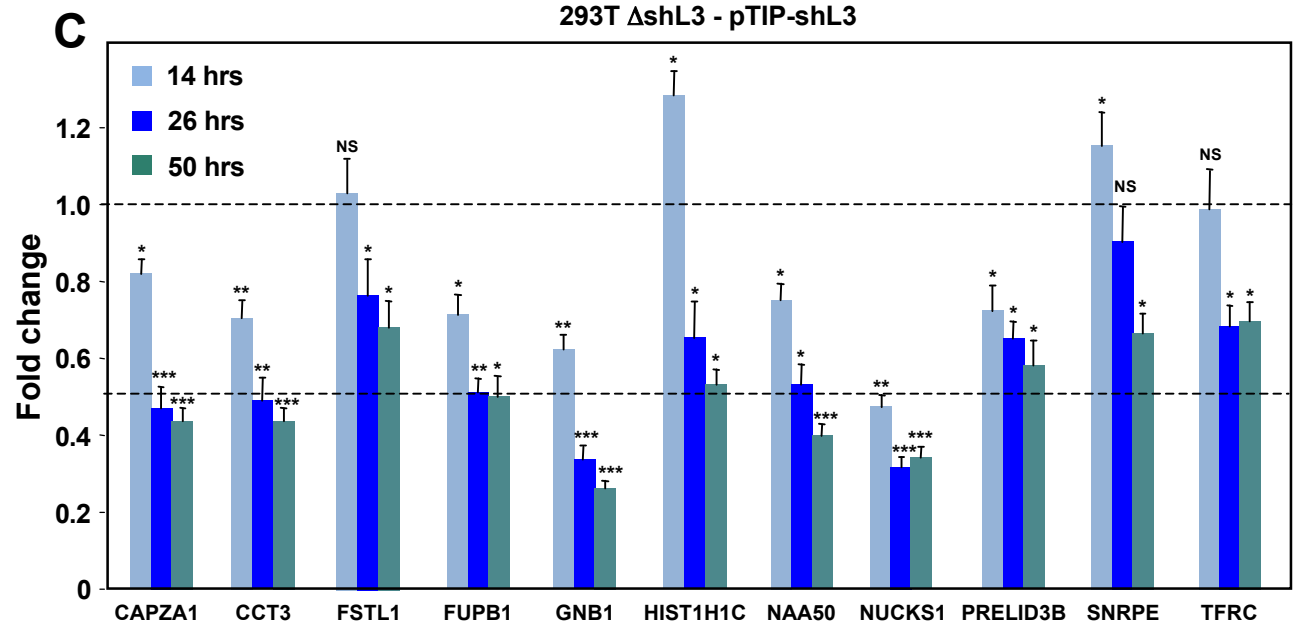

**D**

|      |   |   |   |   |  |   |   |   |   |   |   |
|------|---|---|---|---|--|---|---|---|---|---|---|
| siL3 |   |   | X | X |  | X |   |   |   |   | X |
| shL1 |   |   |   |   |  | X |   |   |   |   |   |
| shL3 |   | X |   | X |  | X | X | X | X | X | X |
| shR7 | X | X |   | X |  | X | X | X | X | X |   |

Figure 4 - figure supplement 2

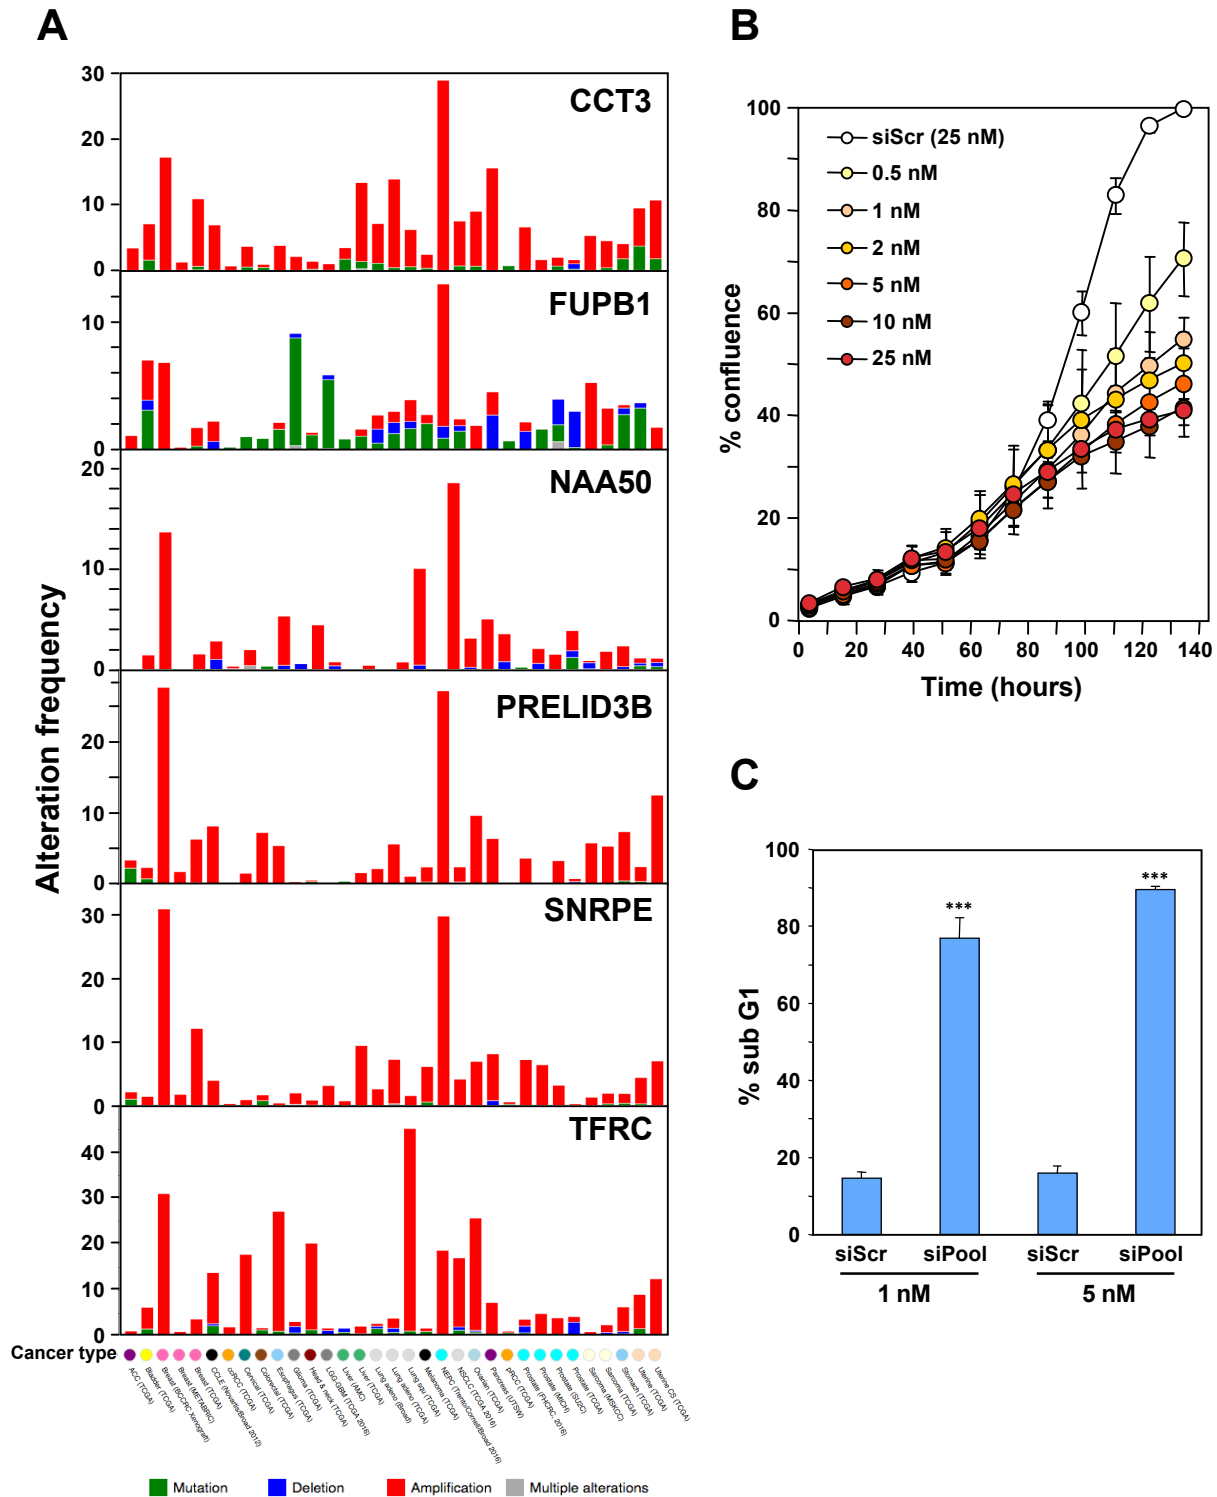

Figure 4 - figure supplement 3

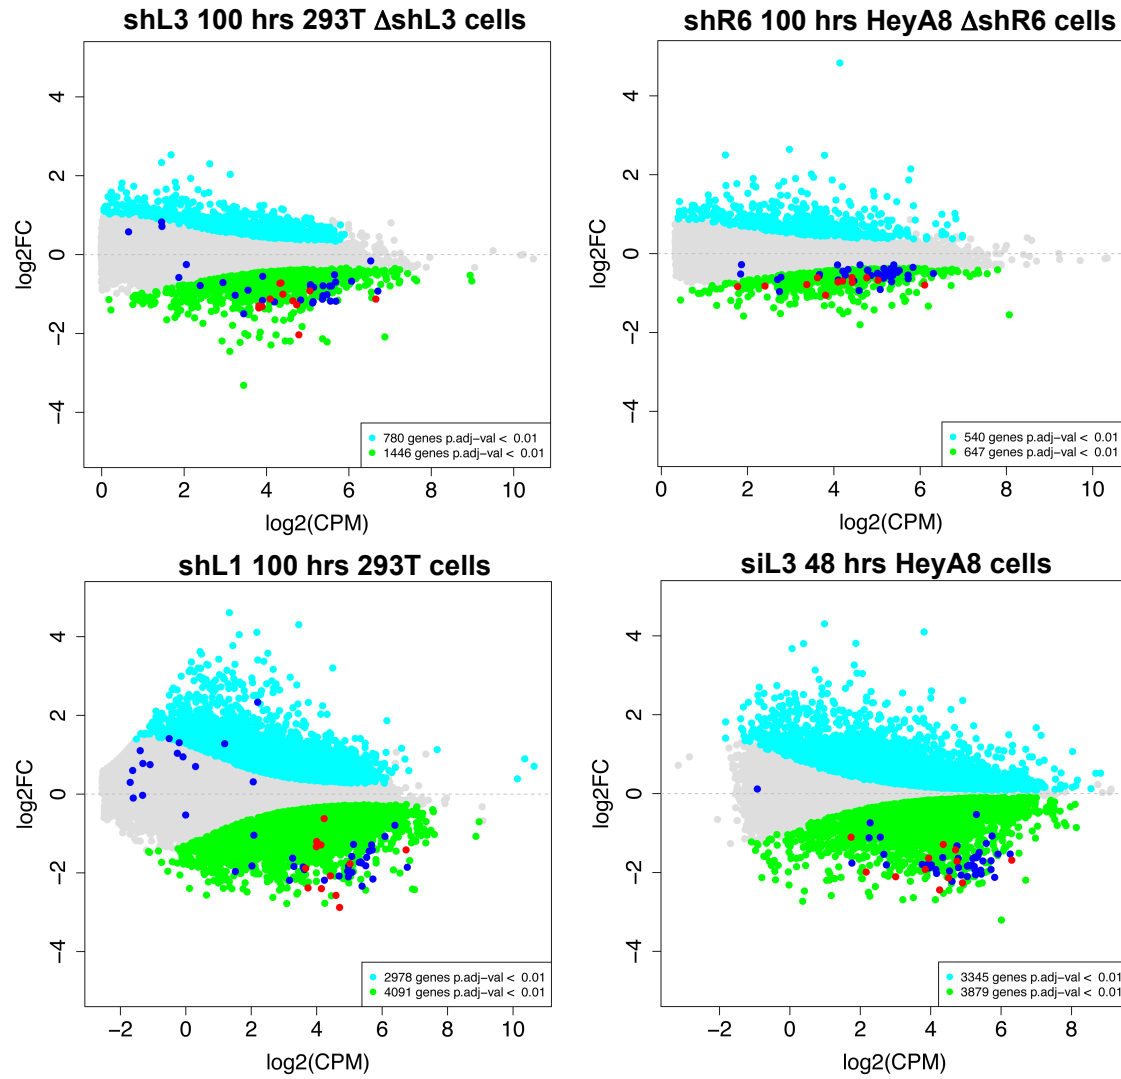

Figure 5

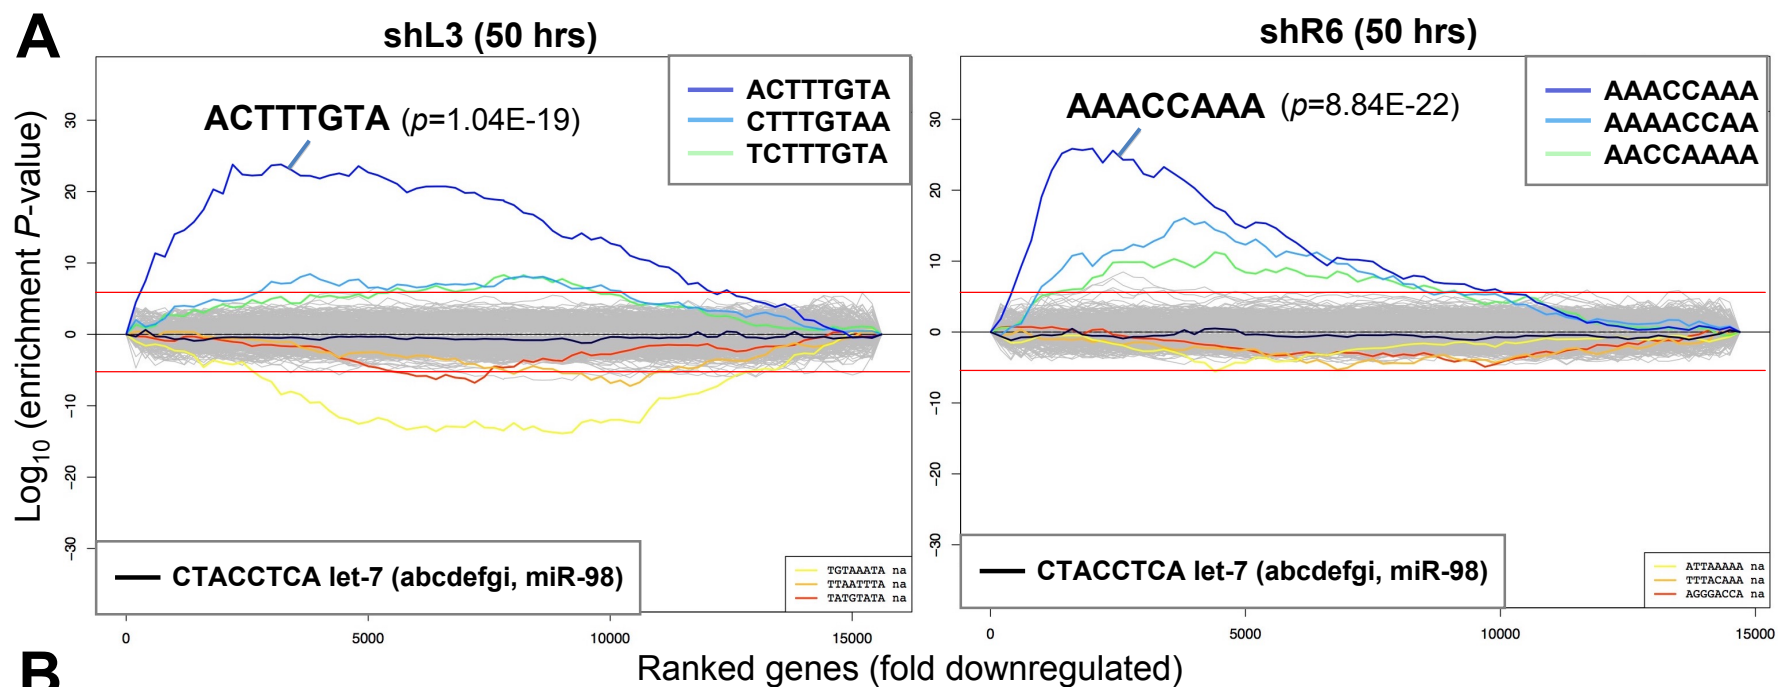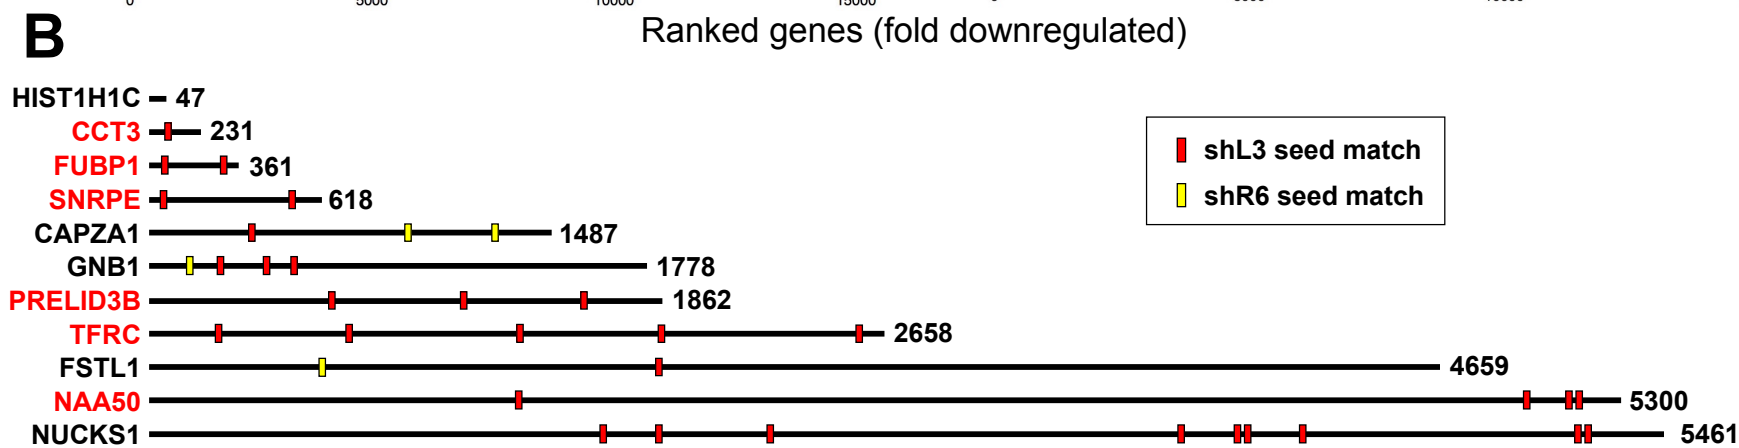

**C**

Downregulated

| Seed match present | shL3 (50hrs) |     | shL3 (100hrs) |     | shR6 (50hrs) |     | shR6 (100hrs) |     | shL1 (100hrs) |     | siL3 (48hrs) |     |
|--------------------|--------------|-----|---------------|-----|--------------|-----|---------------|-----|---------------|-----|--------------|-----|
|                    | No           | Yes | No            | Yes | No           | Yes | No            | Yes | No            | Yes | No           | Yes |
| No                 | 825          | 2   | 783           | 48  | 1113         | 13  | 1108          | 16  | 600           | 189 | 1205         | 238 |
| Yes                | 904          | 55  | 850           | 109 | 612          | 40  | 619           | 31  | 746           | 259 | 244          | 93  |
| P-value            | 2.83E-13     |     | 2.58E-05      |     | 6.65E-09     |     | 4.31E-05      |     | 0.38          |     | 5.74E-06     |     |

Figure 5 - figure supplement 1

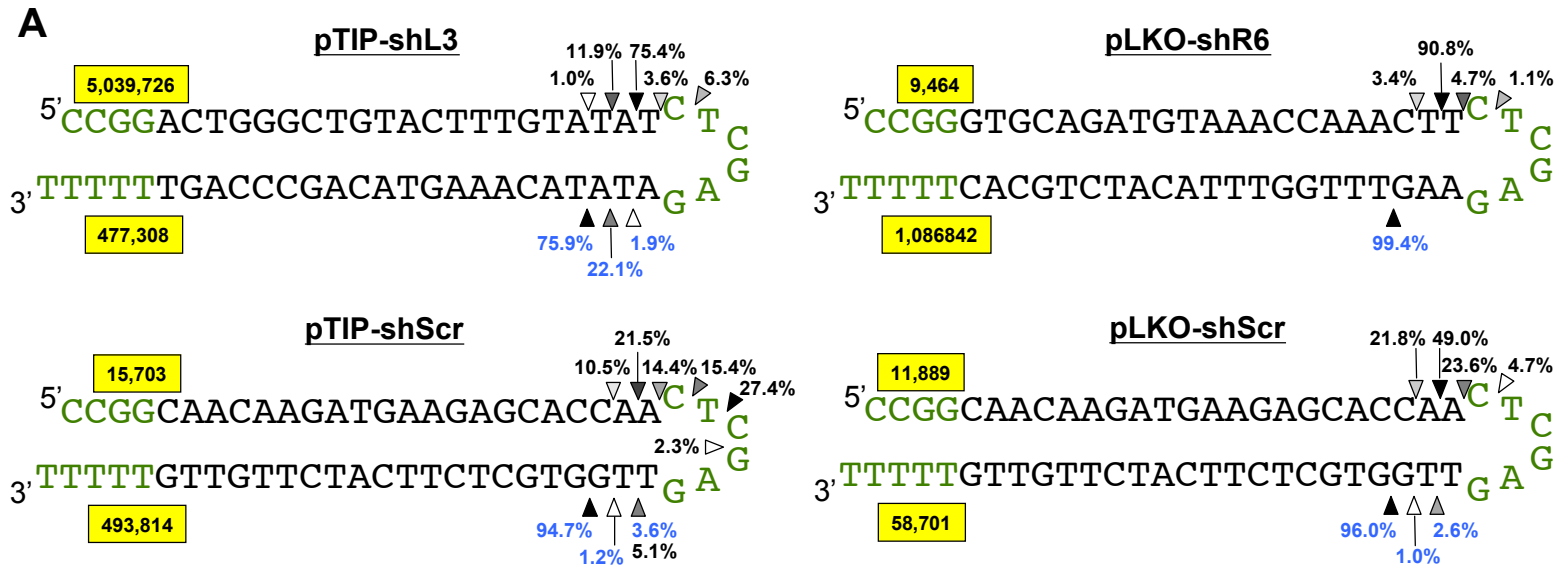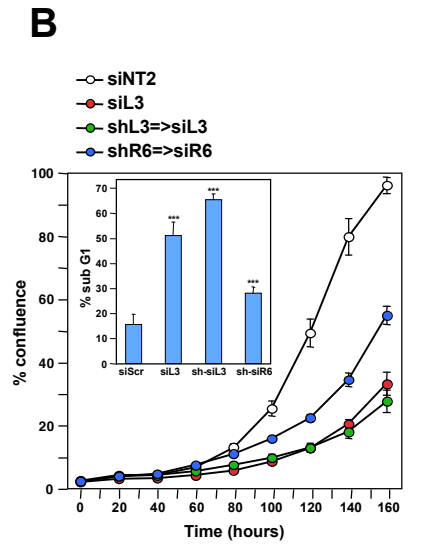

Figure 5 - figure supplement 2

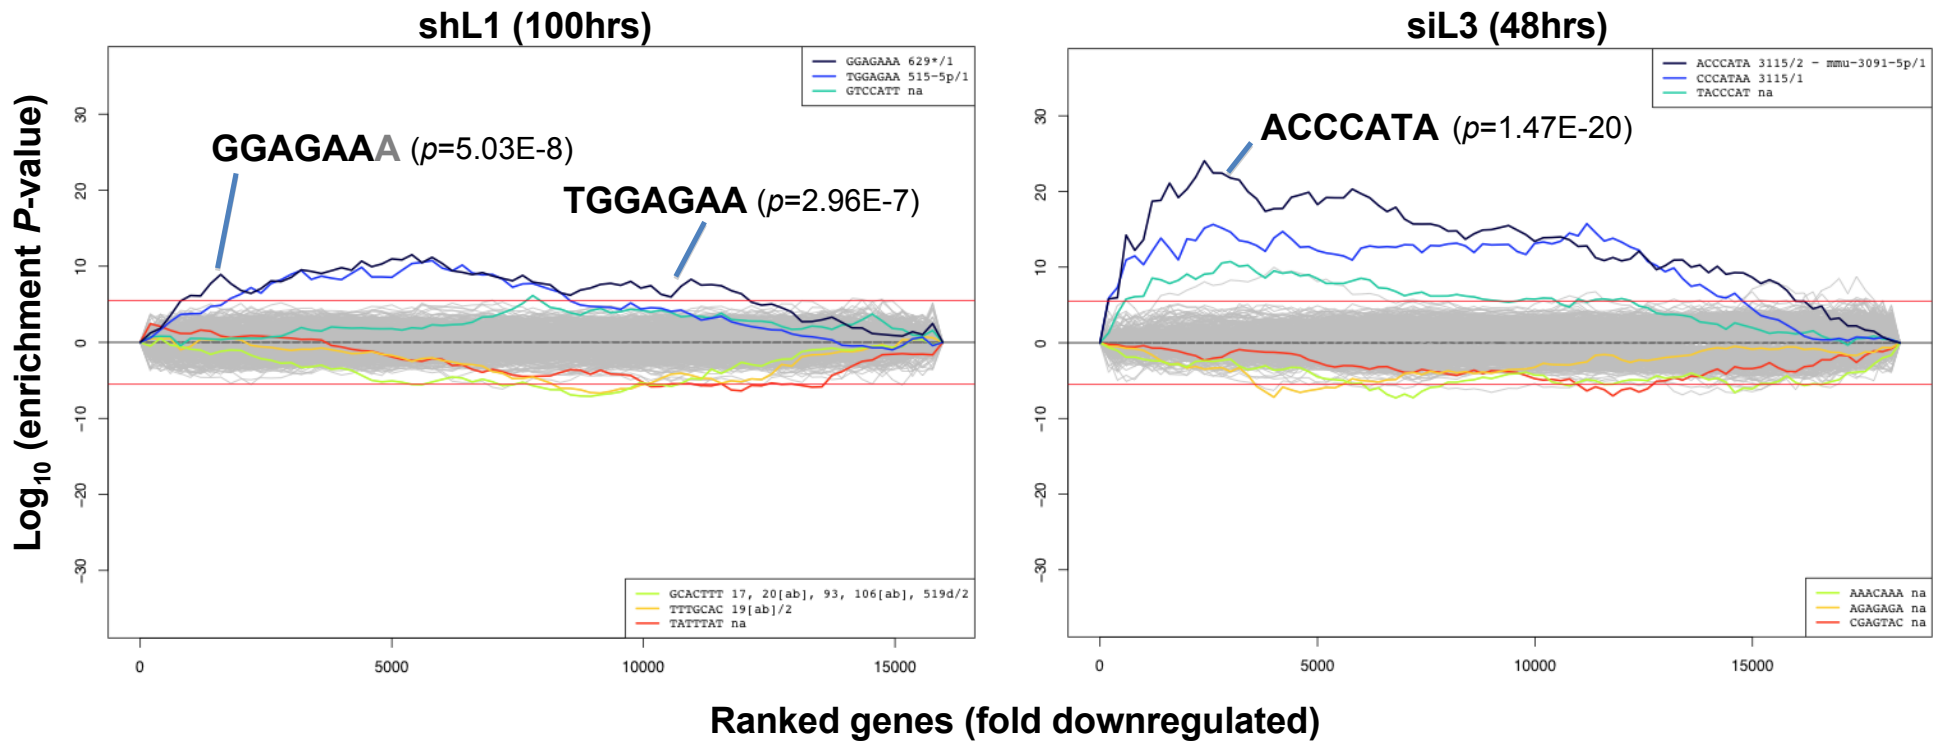

## Figure 5 - figure supplement 3

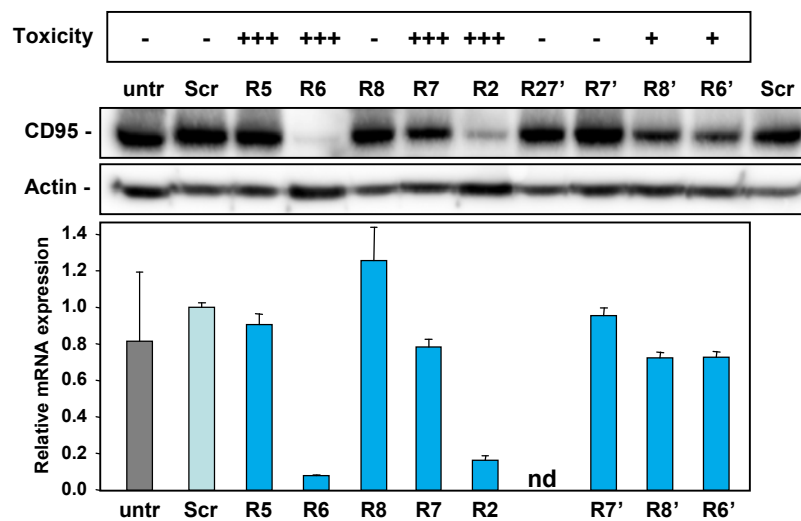

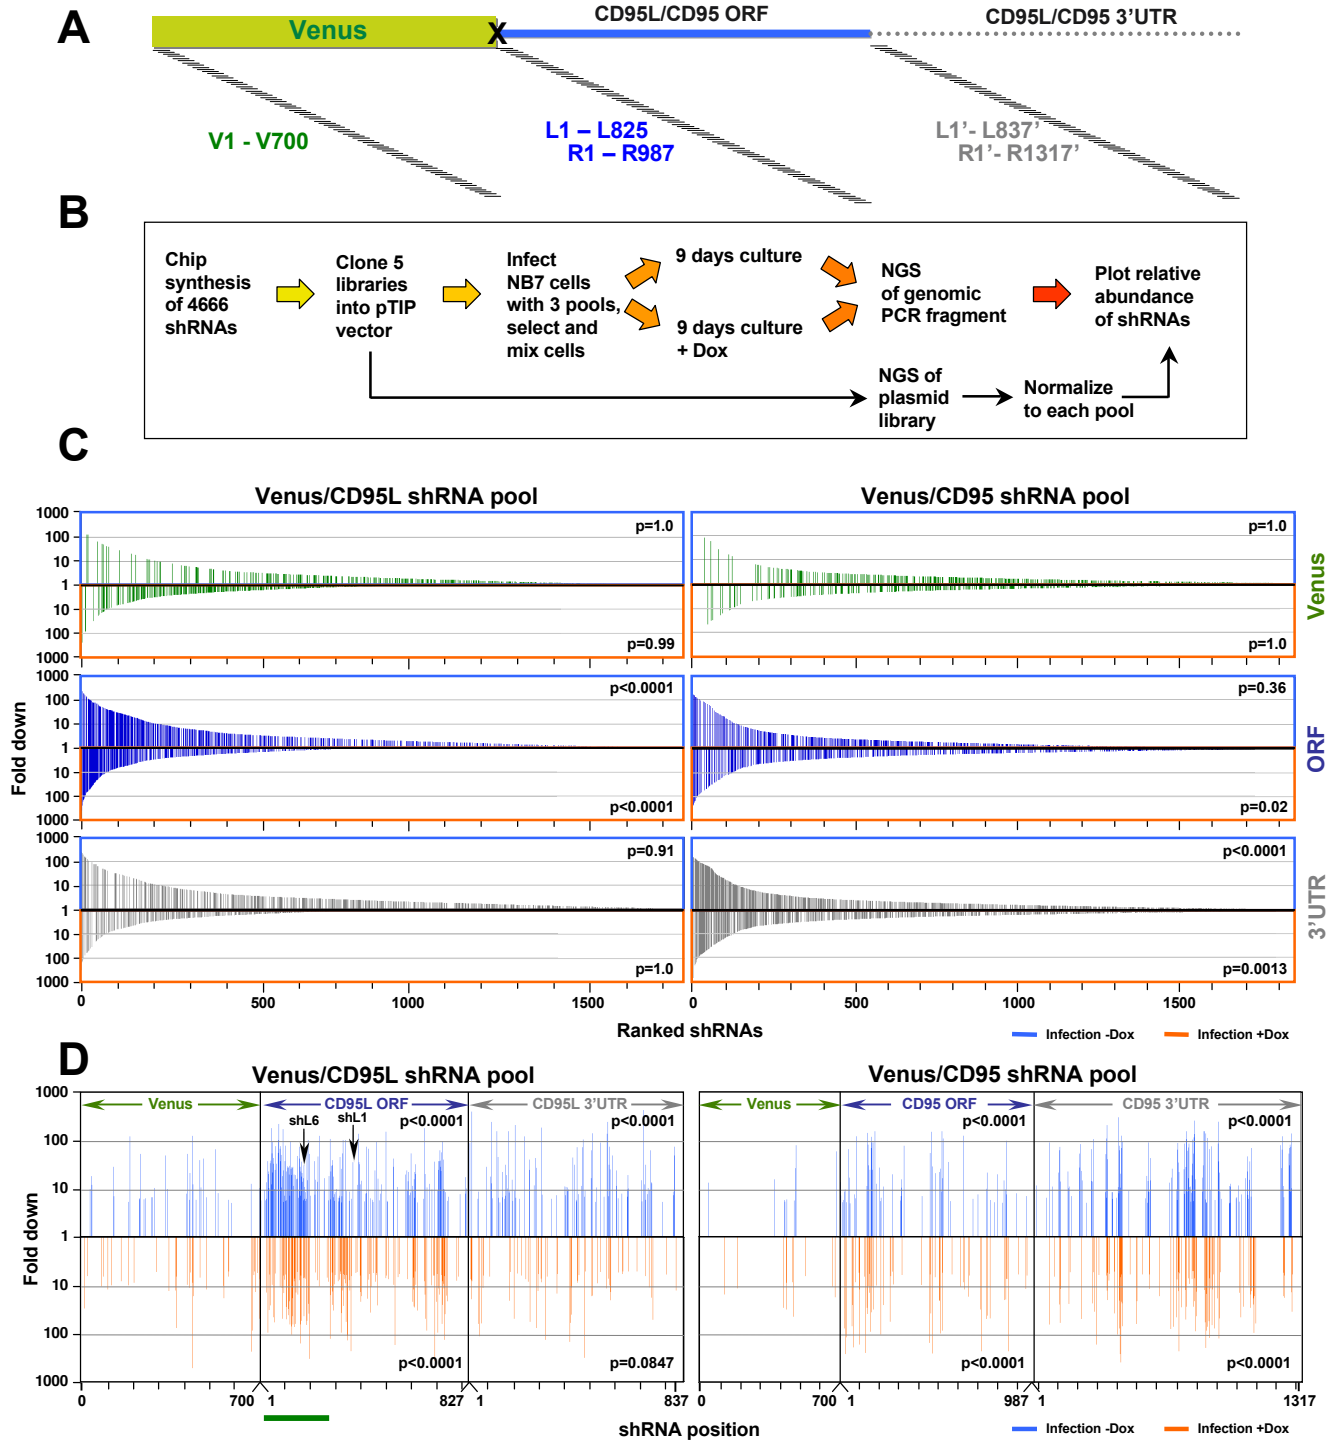



# Figure 6 - figure supplement 1

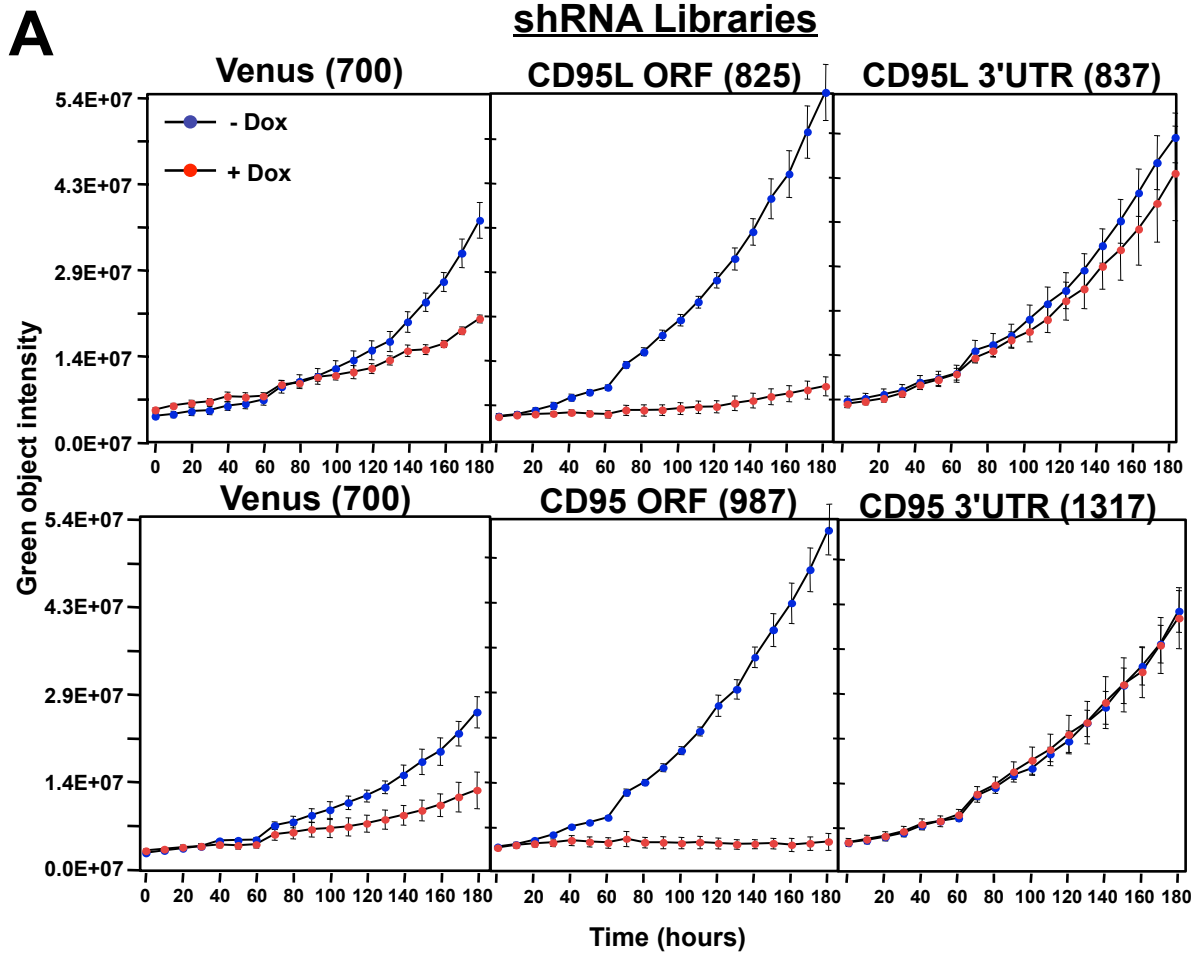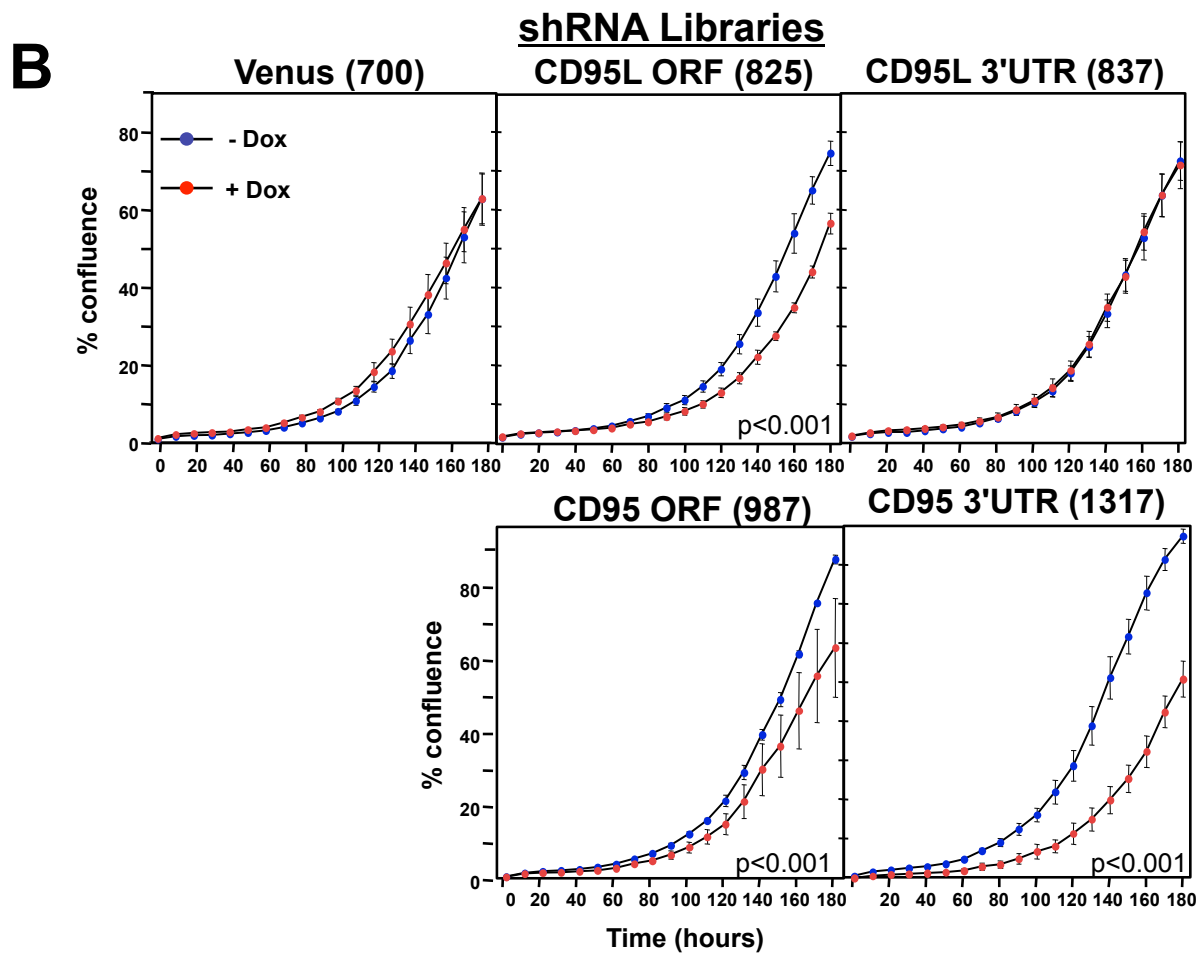

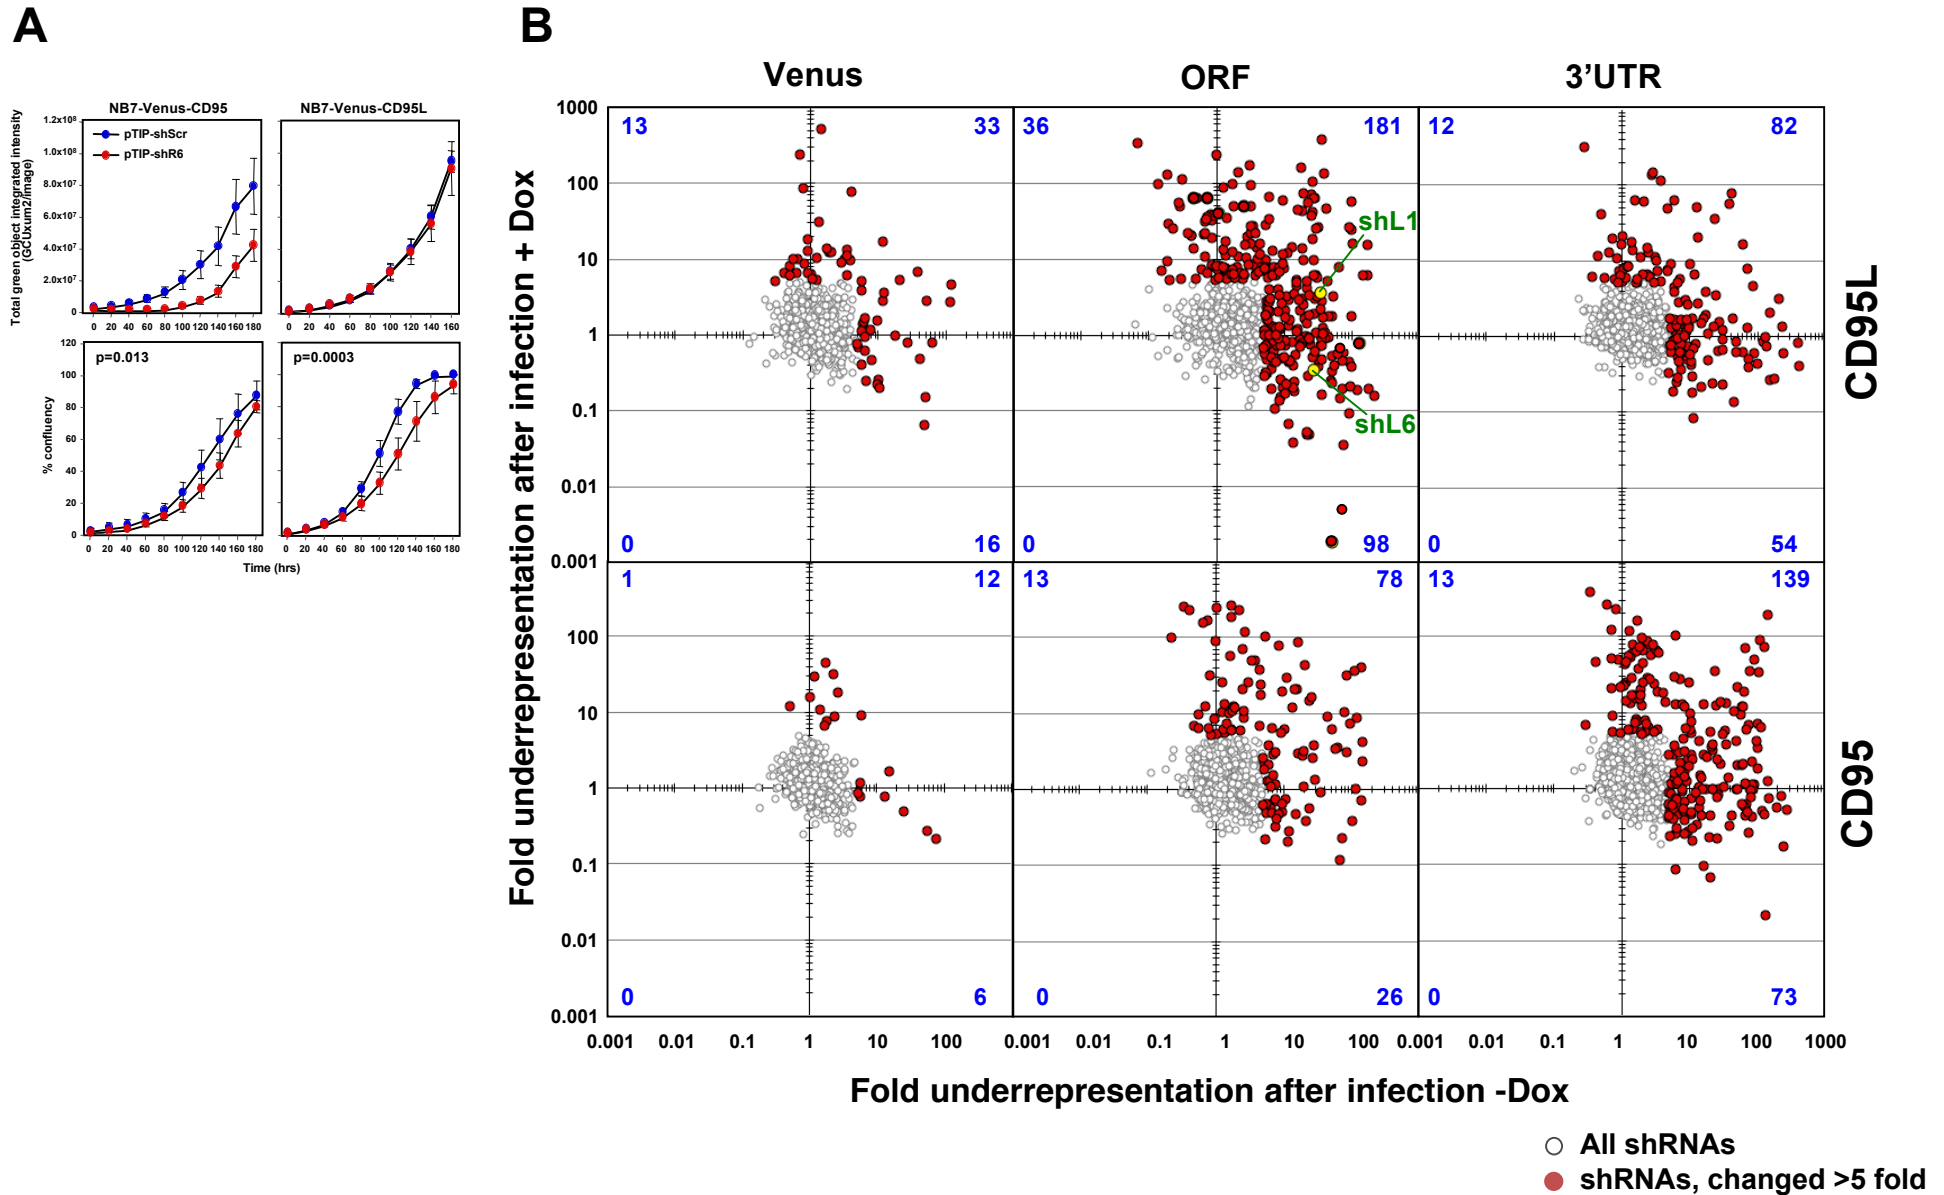

Figure 7

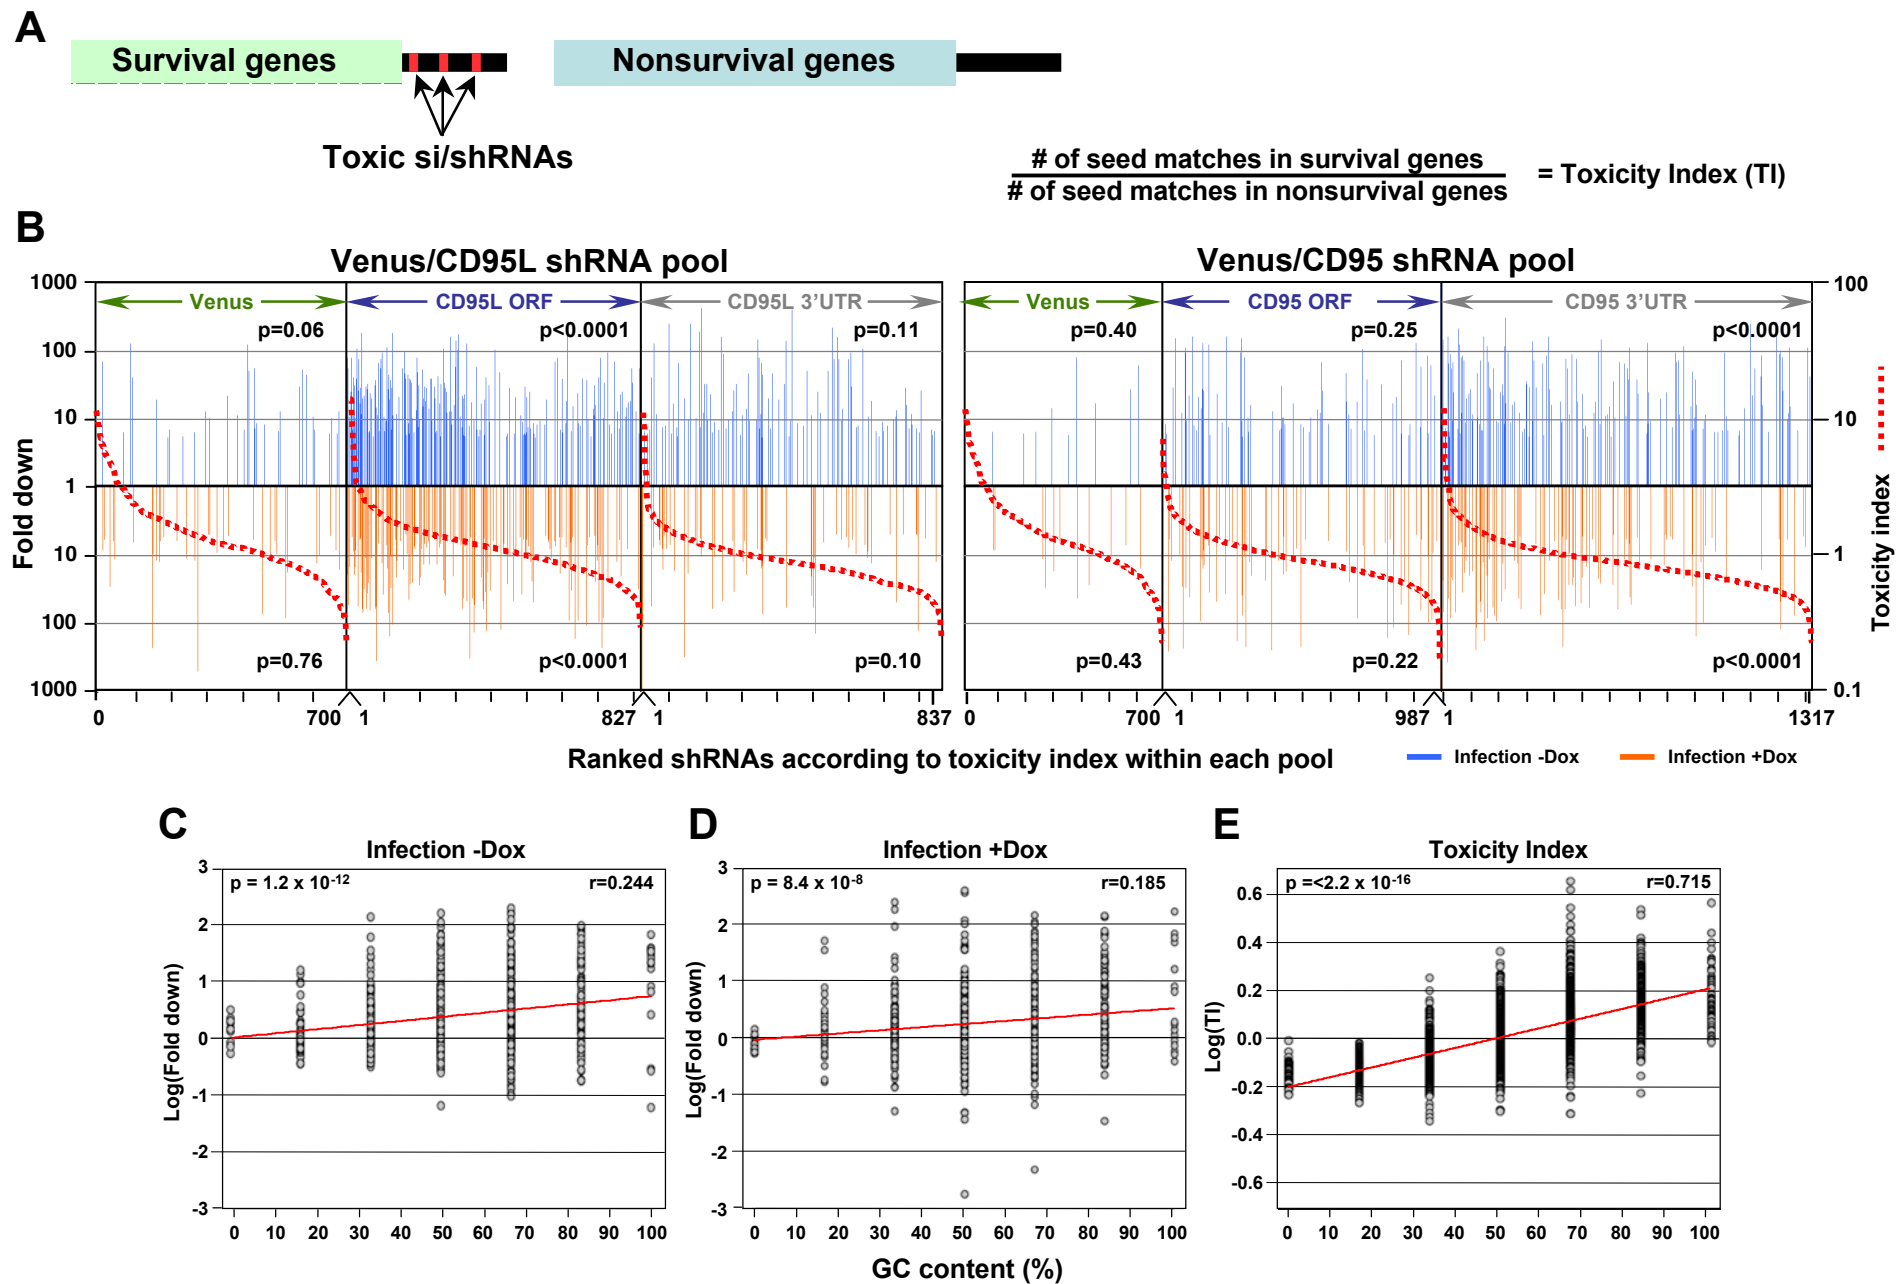

Figure 7 - figure supplement 1

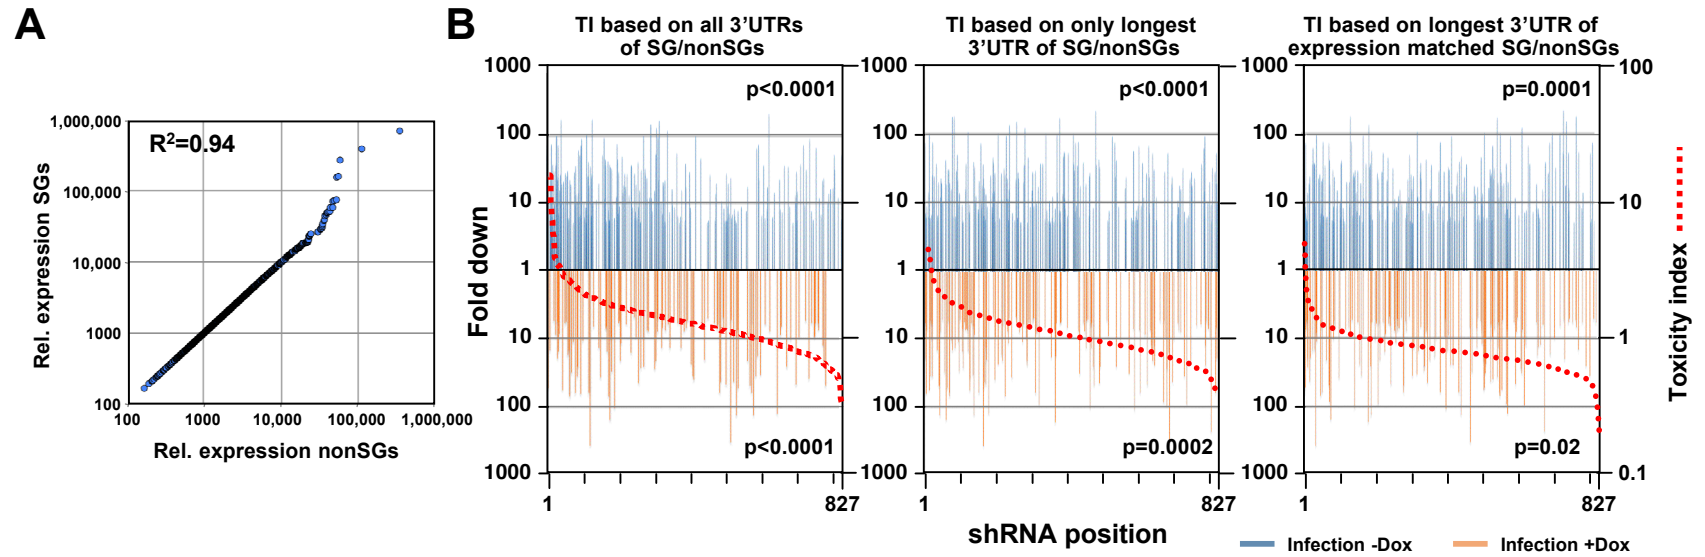

Source: http://biorxiv.org/content/10.1101/141952v4.full.pdf
